# Supplementary material for: Probing the evolution of an Ar-BINMOL-derived salen–Co(iii) complex for asymmetric Henry reactions of aromatic aldehydes: salan–Cu(ii) versus salen–Co(iii) catalysis
Source: Royal Society of Chemistry journal article supplement (doi:10.1039/c4ra06056c), 2014-08-14

## Supporting Information

### Probing Evolution of Ar-BINMOL-derived Salen-Co(III) Complex for Asymmetric Henry Reactions of Aromatic Aldehydes: Salan-Cu(II) *versus* Salen-Co(III) Catalysis

Yun-Long Wei<sup>†</sup>, Ke-Fang Yang<sup>†</sup>, Fei Li, Zhan-Jiang Zheng, Zheng Xu, and Li-Wen Xu<sup>\*</sup>

Key Laboratory of Organosilicon Chemistry and Material Technology of Ministry of Education (MOE), Hangzhou Normal University, Hangzhou 311121, and Key Laboratory of Applied Surface and Colloid Chemistry, Ministry of Education (MOE) and School of Chemistry and Chemical Engineering, Shaanxi Normal University, Xi'an 710062, P. R. China. Fax: (+86)-571-28867756; E-mail: [liwenxu@hznu.edu.cn](mailto:liwenxu@hznu.edu.cn), [liepxulw@yahoo.com](mailto:liepxulw@yahoo.com)

<sup>†</sup>Mr. Y. L. Wei and Dr. K. F. Yang contributed equally to this work (Co-first authors)

## Contents

|                                                                                                                                                                                                                              |            |
|------------------------------------------------------------------------------------------------------------------------------------------------------------------------------------------------------------------------------|------------|
| <i>1. General information</i> .....                                                                                                                                                                                          | <i>p1</i>  |
| <i>2. The Synthesis of Salen and Salan Ligand</i> .....                                                                                                                                                                      | <i>p2</i>  |
| <i>3. The synthesis of (Salen)Co(III)-X catalysts</i> .....                                                                                                                                                                  | <i>p16</i> |
| <i>4. General procedure for the asymmetric Henry reactions</i> .....                                                                                                                                                         | <i>p19</i> |
| <b>Table S1.</b> The effect of aromatic compound on the catalytic Henry reaction of substituted aromatic aldehydes.....                                                                                                      | <i>p31</i> |
| <b>Figure S1.</b> Benzaldehyde-assisted catalytic Henry reaction of substituted aromatic aldehydes.....                                                                                                                      | <i>p32</i> |
| <b>Figure S2.</b> The comparison of enantioselectivities and yields in the salen-Co ( <b>1a</b> ) catalyzed Henry reaction of F- or Br-substituted aromatic aldehydes.....                                                   | <i>p34</i> |
| <b>Figure S3.</b> Optimized structures of the most reasonable catalyst-substructure complexes ( <i>o</i> -fluorobenzaldehyde and ( <i>R,R,S,S</i> )-salen ( <b>5a</b> )-Co(III) catalyst) based on experimental results..... | <i>p35</i> |
| <i>5. HPLC chromatograms of Henry products 3</i> .....                                                                                                                                                                       | <i>p36</i> |
| <i>6. NMR Charts of salen ligands and Compounds 3</i> .....                                                                                                                                                                  | <i>p55</i> |

## General information

All reagents and solvents were used directly without purification. Flash column chromatography was performed over silica (200-300 mesh). Reactions were monitored by thin layer chromatography using silica gel.  $^1\text{H}$  NMR and  $^{13}\text{C}$  NMR (500 and 125MHz, respectively) spectra were recorded in  $\text{CDCl}_3$ ,  $^1\text{H}$  NMR chemical shifts are reported in ppm relative to tetramethylsilane (TMS) with the solvent resonance employed as the internal standard ( $\text{CDCl}_3$  at 7.26 ppm,  $(\text{CD}_3)_2\text{CO}$  at 2.05ppm).  $^{13}\text{C}$  NMR chemical shifts are reported in ppm from tetramethyl silane (TMS) with the solvent resonance as the internal standard ( $\text{CDCl}_3$  at 77.20 ppm). Thin layer chromatography was performed using silica gel;  $\text{F}_{254}$  TLC plates and visualized with ultraviolet light. HPLC was carried out with a Waters 2695 Millennium system equipped with a photodiode array detector. The ESI-MS analysis of the samples was operated on an LCQ advantage mass spectrometer (ThermoFisher Company, USA), equipped with an ESI ion source in the positive ionization mode, with data acquisition using the Xcalibur software (Version 1.4).

## 2. The Synthesis of Salen and Salan Ligand

### 2.1. Schematic synthesis of salan 1-3

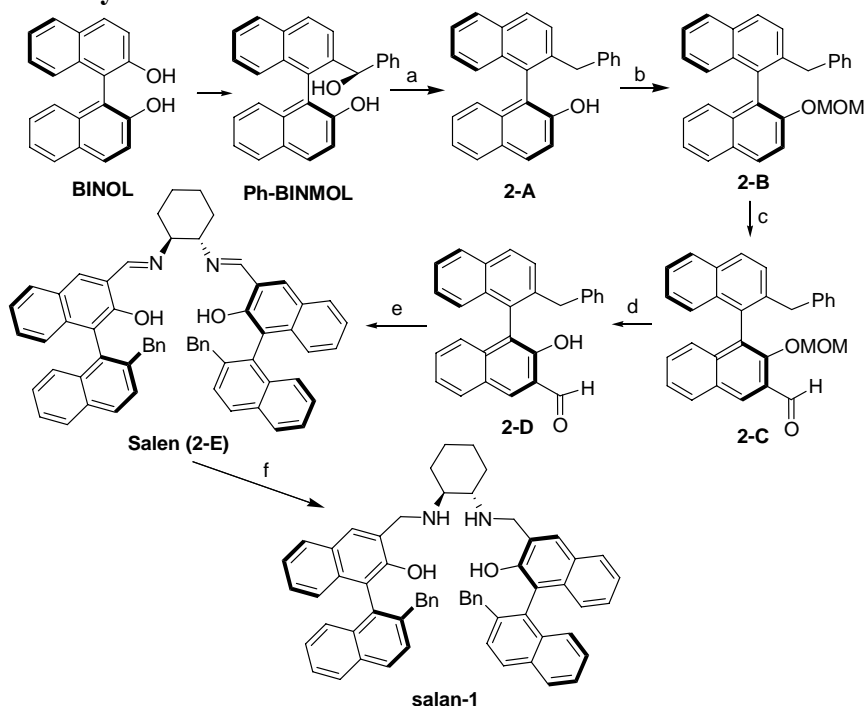

## 2.2 The synthesis of BINOL-derived product salan (1) from Ph-BINMOL:

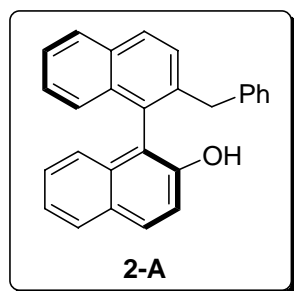

**Step a:** To a solution of (*S, R*)-Ar-BINMOL (9.4g, >99%*ee*, 25 mmol) and NaI (22.5 g, 150 mmol) in dry acetonitrile (100 mL) were added TMSCl (13 mL, 150 mmol) at room temperature under Argon atmosphere. After the addition, the solution was allowed to stir at room temperature overnight. Then saturated sodium thiosulfate solution was added until the mixture turned colorless. The resultant mixture was extracted with DCM, and washed with water and saturated NaCl solution. The organic layer was dried over Na<sub>2</sub>SO<sub>4</sub>, concentrated, and the residue was purified by column chromatography (hexanes/ethyl acetate = 5/1) to give the desired product **2-A** (9 g, 100% yield) as a white solid. <sup>1</sup>H NMR (CDCl<sub>3</sub>, 400 MHz)  $\delta$  7.91 (m, 3H), 7.52 (d, *J* = 8.4 Hz, 1H), 7.45 (t, *J* = 6.8 Hz, 1H), 7.52-7.25 (m, 8H), 7.12 (d, *J* = 7.2 Hz, 2H), 6.99 (d, *J* = 8.0 Hz, 1H), 6.90 (d, *J* = 6.0 Hz, 1H), 4.62 (s, 1H), 3.77 (s, 2H). <sup>13</sup>C NMR (CDCl<sub>3</sub>, 100 MHz)  $\delta$  151.2, 140.5, 140.3, 133.7, 133.2, 132.8, 130.1, 129.3, 129.1, 129.1, 128.4, 128.3, 128.2, 127.0, 126.8, 126.1, 126.0, 125.8, 124.7, 124.7, 123.5, 117.5, 117.3, 77.4, 77.1, 76.8, 39.8 ppm. IR (neat, cm<sup>-1</sup>): 3488, 3439, 3052, 3020, 2957, 2925, 1924, 1810, 1685, 1617, 1596, 1517, 1505, 1493, 1468, 1450, 1438, 1401, 1379, 1361, 1332, 1301, 1271, 1260, 1236, 1220, 1202, 1173, 1142, 1126, 1074, 1026, 975, 968, 948, 935, 910, 875, 868, 837, 816, 790, 769, 755, 717, 698, 684 cm<sup>-1</sup>. Exact mass calcd for C<sub>27</sub>H<sub>20</sub>O [M+H]<sup>+</sup>, 361.15, Found 361.15.

## 2.3 The synthesis of MOM-protected product (Step b):

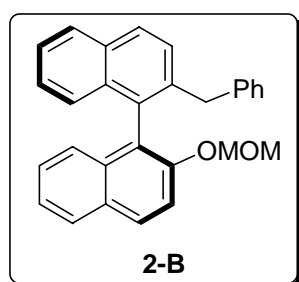

To a solution of NaH (0.96 g, 40 mmol) in dry THF (150 mL) were added compound **2-A** (7.2 g, 20 mmol) which was dissolved in dry THF at 0 °C temperature under Argon atmosphere. The mixture was stirred for 1h, then MOMCl (3.06 mL, 40 mmol) was added at 0 °C. The mixture was allowed to stir at room temperature for 4h. After quenching with water, the resultant mixture was extracted with ethyl acetate, and washed with water and saturated NaCl solution. The organic layer was dried over MgSO<sub>4</sub>, concentrated, and the residue was purified by column chromatography (hexanes/ethyl acetate = 10/1) to give the desired product **2-B** (7.28 g, 90% yield) as a pale yellow solid. <sup>1</sup>H NMR (CDCl<sub>3</sub>, 400 MHz) δ 7.93 (m, 4H), 7.59 (d, *J* = 9.2 Hz, H), 7.47-7.34 (m, 3H), 7.22 (s, 3H), 7.12-7.06 (m, 4H), 6.94 (s, 2H), 4.91 (m, 2H), 3.78 (s, 2H), 3.15 (s, 3H). <sup>13</sup>C NMR (CDCl<sub>3</sub>, 100 MHz) δ 152.6, 141.1, 138.0, 134.0, 133.3, 132.7, 132.3, 129.7, 129.6, 129.2, 128.1, 128.0, 127.9, 127.9, 127.8, 126.5, 126.3, 126.0, 125.7, 125.4, 125.3, 124.1, 116.4, 94.6, 77.4, 77.1, 76.8, 55.8, 39.9 ppm. IR (neat, cm<sup>-1</sup>): 3419, 3060, 3025, 2951, 2920, 2900, 2848, 2839, 1910, 1754, 1621, 1592, 1504, 1492, 1471, 1450, 1435, 1401, 1355, 1335, 1300, 1269, 1246, 1200, 1166, 1148, 1088, 1069, 1032, 1013, 946, 923, 897, 861, 843, 829, 812, 794, 784, 762, 747, 740, 718, 696, 683 cm<sup>-1</sup>. Exact mass calcd for C<sub>29</sub>H<sub>24</sub>O<sub>2</sub> [M+Na]<sup>+</sup>, 427.17, Found 427.17.

#### 2.4 The synthesis of BINMOL-derived aldehyde (Step c):

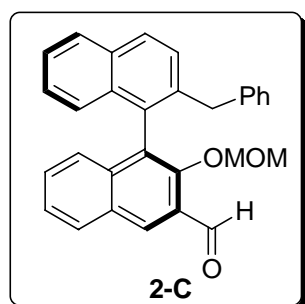

To a solution of compound **2-B** (4.04 g, 10 mmol) in the dry THF (100 ml) were added TMEDA (1.8 ml, 12 mmol) in dry THF at -78 °C under Argon atmosphere. Then *n*-BuLi (9 ml, 14 mmol, 1.5 M in hexane) was added slowly in 1h. After the addition, the solution was allowed to stir at 0 °C for 30 min. The solution was then cooled to

-78 °C. A solution of dry DMF (10 mL, 13 mmol) in THF (10 mL) was added to the reaction and the solution was stirred for 30 min at -78 °C. The mixture was warmed to 0 °C and stirred for additional 1.5 h. After quenching with saturated NH<sub>4</sub>Cl solution, 1 M HCl was added to the reaction mixture. The mixture was extracted with ethyl acetate, and washed with saturated NaHCO<sub>3</sub>, water and saturated NaCl solution. The organic layer was dried over Na<sub>2</sub>SO<sub>4</sub>, concentrated, and the residue was purified by column chromatography (hexanes/ethyl acetate = 20/1) to give the desired product **2-C** (3.24 g, 75% yield) as a pale yellow power. <sup>1</sup>H NMR (500 MHz, CDCl<sub>3</sub>) δ: 10.61 (s, 1H), 8.60 (s, 1H), 8.02-8.04 (d, J = 8 Hz, 1H), 7.90-7.93 (t, J = 9Hz, 2H), 7.48-7.49 (d, J = 8.5, 1H), 7.43-7.4 (m, 2H), 7.25-7.30 (m, 2H), 7.19-7.20 (d, J = 8.5 Hz, 1H), 7.03-7.08 (m, 4H), 6.88-6.89 (d, J = 7.5Hz, 1H), 4.68-4.69 (m, 1H), 4.55-4.56 (m, 1H), 3.92-3.95 (d, J = 15.5 Hz, 1 H), 3.78-3.85 (d, J = 15.5 Hz, 1H), 2.93 (s, 3H); <sup>13</sup>C NMR (125 MHz, CDCl<sub>3</sub>) δ:153.2, 140.2, 138.9, 136.9, 133.3, 132.3, 131.8, 131.1, 130.1, 129.2, 129.0, 128.6, 128.1, 128.0, 126.5, 126.2, 126.0, 125.9, 99.9, 57.0, 40.1 ppm. IR (neat, cm<sup>-1</sup>): 3057, 2920, 1689, 1618, 1586, 1506, 1496, 1451, 1382, 1354, 1330, 1259, 1182, 1156, 1104, 1073, 1042, 963, 925, 879, 832, 807, 787, 754, 712, 698, 665 cm<sup>-1</sup>. Exact mass calcd for C<sub>30</sub>H<sub>24</sub>O<sub>3</sub> [M+Na]<sup>+</sup>, 455.16, Found 455.16.

## 2.5 The synthesis of deprotected BINMOL-derived aldehyde (Step d):

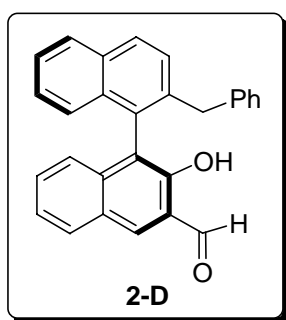

To a solution of compound **2-C** (3.03 g, 7 mmol) in THF (75 ml) were added slowly Conc. HCl (75 ml) at 0 °C. The mixture was stirred for 2 h at room temperature. Then water was added, The resultant mixture was extracted with ethyl acetate, and washed with saturated NaHCO<sub>3</sub>, water and saturated NaCl solution. The organic layer was dried over Na<sub>2</sub>SO<sub>4</sub>, concentrated, and the residue was purified by column

chromatography (hexanes/ethyl acetate = 10/1) to give the desired product **2-D** (2.58 g, 95% yield) as a yellow power.  $^1\text{H}$  NMR ( $\text{CDCl}_3$ , 400 MHz)  $\delta$  10.04 (s, H), 10.18 (s, H), 8.42 (s, H), 7.87 (d,  $J = 8.8$  Hz, 3H), 7.70 (s, H), 7.46-7.43 (m, 2H), 7.36 (d,  $J = 8.0$  Hz, 2H), 7.36 (d,  $J = 8.0$  Hz, 2H), 7.06 (s, 4H), 6.94 (d,  $J = 8.4$  Hz, 3H), 3.78 (d,  $J = 5.6$  Hz, 2H).  $^{13}\text{C}$  NMR ( $\text{CDCl}_3$ , 100 MHz)  $\delta$  196.8, 153.4, 140.7, 138.5, 138.0, 137.7, 132.9, 132.5, 130.6, 129.8, 129.2, 128.5, 128.2, 128.2, 128.1, 127.5, 126.4, 125.8, 125.7, 125.4, 125.2, 124.5, 122.1, 120.8, 39.9 ppm. IR (neat,  $\text{cm}^{-1}$ ): 3428, 3150, 3059, 2838, 1792, 1655, 1629, 1577, 1506, 1452, 1443, 1412, 1384, 1292, 1254, 1225, 1212, 1179, 1142, 1115, 1073, 1054, 1025, 952, 936, 923, 895, 879, 856, 809, 796, 778, 757, 711, 697, 681  $\text{cm}^{-1}$ . Exact mass calcd for  $\text{C}_{28}\text{H}_{20}\text{O}_2$   $[\text{M}]^+$ , 388.15. Found 388.15;

## 2.6 The synthesis of BINMOL-derived salen (Step e):

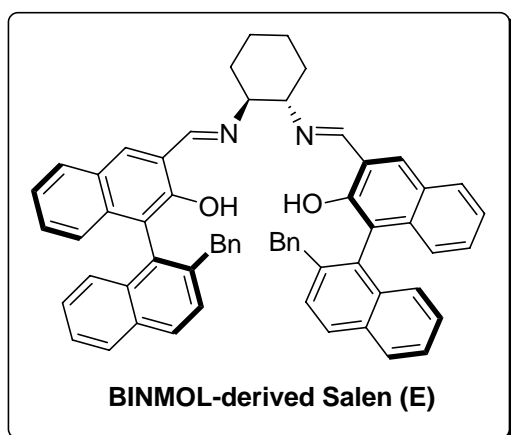

To a solution of (1*S*,2*S*)-diaminocyclohexane tartrate (0.66 g, 2.5 mmol) and  $\text{K}_2\text{CO}_3$  (0.7 g, 5 mmol) in 50% ethanol (12 ml) were added slowly compound **2-D** (1.94 g, 5 mmol) in ethanol (24 ml) at room temperature. After the addition, the solution was allowed to stir at room temperature for 48 h. The precipitate was collected by filtration, washed with ice ethanol, and dried in vacuum oven to obtain the product salen **2-E** (2.03 g, 95% yield) as a pale yellow power.  $^1\text{H}$  NMR ( $\text{CDCl}_3$ , 400 MHz)  $\delta$  8.45 (s, H), 8.34 (s, H), 8.01 (t,  $J = 7.2$  Hz, H), 7.90 (d,  $J = 8.8$  Hz, 4H), 7.76 (t,  $J = 8.0$  Hz, 4H), 7.49-7.46 (m, 3H), 7.40 (s, H), 7.38 (s, H), 7.30 (s, H), 7.22 (s, H), 7.11-7.08 (m, 7H), 7.00 (s, H), 6.97 (d,  $J = 8.0$  Hz, 5H), 6.94 (s, H), 6.92 (s, H), 3.81 (d,  $J = 5.6$  Hz, 4H), 3.32-3.30 (m, 2H), 1.99 (d,  $J = 13.6$  Hz, 2H), 1.89 (d,  $J = 8.8$  Hz, 2H), 1.70 (d,

$J = 11.2$  Hz, 2H), 1.46 (t,  $J = 10.0$  Hz, 2H).  $^{13}\text{C}$  NMR ( $\text{CDCl}_3$ , 100 MHz)  $\delta$  196.8, 165.0, 154.4, 141.0, 138.4, 138.0, 133.3, 129.3, 129.2, 128.9, 128.3, 128.2, 128.2, 128.0, 126.4, 126.1, 125.8, 125.8, 125.7, 125.6, 125.5, 125.2, 125.2, 124.7, 124.5, 123.3, 120.4, 119.3, 39.9 ppm. IR (neat,  $\text{cm}^{-1}$ ): 3403, 3055, 2929, 2856, 1629, 1597, 1506, 1494, 1443, 1380, 1348, 1294, 1258, 1180, 1143, 1115, 1062, 1024, 941, 915, 808, 746, 712, 697  $\text{cm}^{-1}$ . Exact mass calcd for  $\text{C}_{62}\text{H}_{50}\text{N}_2\text{O}_2$   $[\text{M}+\text{H}]^+$ , 855.39, Found 855.39.

## 2.7 The synthesis of desired salan ligand (Step f):

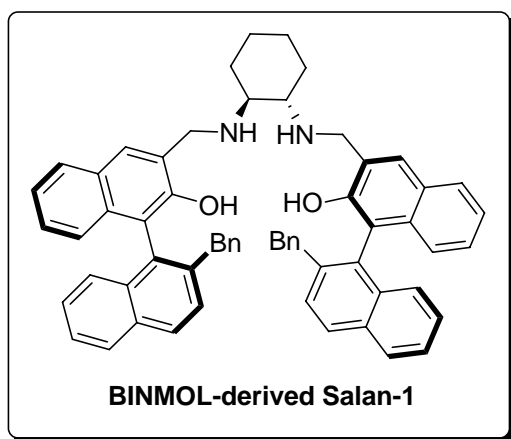

To a solution of compound **E** (1.71 g, 2 mmol) in MeOH (20 ml) were added  $\text{NaBH}_4$  (0.08 g, 2.2 mmol) at  $0^\circ\text{C}$ . After stirring for 2 h, water was added to quench the reaction. The solvent was removed under vacuum. The resultant mixture was extracted with DCM, and washed with water and saturated NaCl solution. The organic layer was dried over  $\text{Na}_2\text{SO}_4$ , concentrated, and the residue was purified by column chromatography (hexanes/ethyl acetate = 10/1) to give the **BINMOL-derived Salan-1** (1.72 g, >99% yield) as a white solid.  $^1\text{H}$  NMR ( $\text{CDCl}_3$ , 400 MHz)  $\delta$  7.87 (d,  $J = 8.4$  Hz, 5H), 7.75 (d,  $J = 8.0$  Hz, 2H), 7.55 (s, 2H), 7.43 (d,  $J = 8.8$  Hz, 2H), 7.35-7.29 (m, 6H), 7.21-7.16 (m, 4H), 7.13-7.08 (m, 5H), 7.03 (d,  $J = 8.4$  Hz, 2H), 6.98 (d,  $J = 7.6$  Hz, 4H), 4.13 (s, 4H), 3.77 (s, 4H), 2.43 (s, 2H), 2.08 (s, 2H), 1.52 (s, 2H), 1.09 (d,  $J = 4.4$  Hz, 6H).  $^{13}\text{C}$  NMR ( $\text{CDCl}_3$ , 100 MHz)  $\delta$  153.3, 141.3, 138.1, 133.8, 133.2, 132.5, 129.3, 128.1, 128.1, 128.0, 128.0, 127.6, 127.4, 126.3, 126.2, 126.1, 125.6, 125.6, 125.3, 124.7, 123.2, 119.0, 60.2, 50.3, 50.2, 39.8, 30.5, 24.1 ppm. IR (neat,  $\text{cm}^{-1}$ ): 3421, 3052, 3023, 2925, 2852, 1942, 1627, 1601, 1601, 1506, 1493,

1451, 1429, 1374, 1355, 1292, 1252, 1227, 1207, 1182, 1148, 1109, 1074, 1026, 939, 917, 885, 855, 829, 803, 783, 746, 717, 697  $\text{cm}^{-1}$ . Exact mass calcd for  $\text{C}_{62}\text{H}_{54}\text{N}_2\text{O}_2$   $[\text{M}+\text{H}]^+$ , 859.42, Found 859.42.

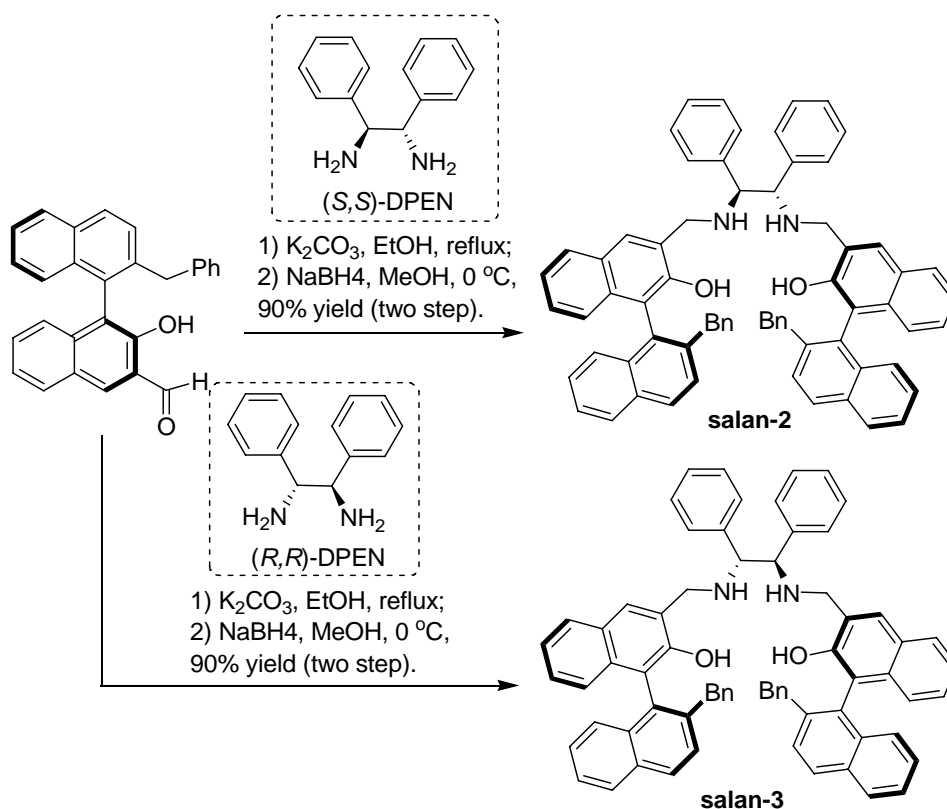

## 2.8 The synthesis of desired salan ligand 2 and 3.

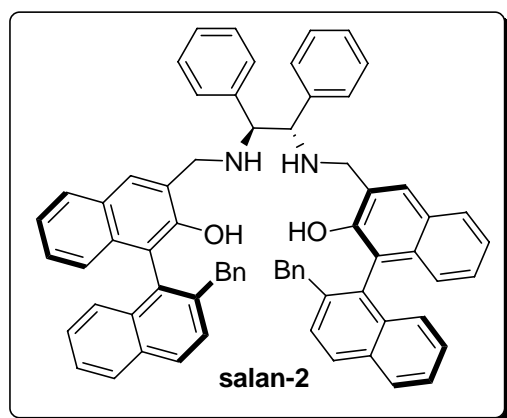

To a solution of (1*S*,2*S*)-(-)-1,2-Diphenyl-1,2-ethanediamine (0.53 g , 2.5 mmol) and  $\text{K}_2\text{CO}_3$  (0.7 g , 5 mmol) in 50% ethanol (12 mL) were added slowly **4** (1.94 g, 5 mmol) in ethanol(24ml) at room temperature. After the addition, the solution was allowed to stir at room temperature for 48h. The precipitate was collected by filtration, washed with ice ethanol, and dried in vacuum oven to obtain the product **salan-2** (2.24 g, 94%



yield) as a pale yellow power. To a solution of **salen-2** (1.90 g, 2 mmol) in MeOH (20 mL) were added NaBH<sub>4</sub> (0.08 g, 2.2 mmol) at 0 °C. After stirring for 2 h, water was added to quench the reaction. The solvent was removed under vacuum. The resultant mixture was extracted with DCM, and washed with water and saturated NaCl solution. The organic layer was dried over Na<sub>2</sub>SO<sub>4</sub>, concentrated, and the residue was purified by column chromatography (hexanes/ethyl acetate = 10/1) to give **salan-2** (1.91 g, >99% yield) as a gray solid. <sup>1</sup>H NMR (400 MHz, CDCl<sub>3</sub>) δ = 7.40 (d, J = 8.8 Hz, 6H), 7.18 (d, 11H), 7.10 (s, 7H), 7.04 (t, J = 8.4 Hz, 6H), 6.95 (t, J = 7.2 Hz, 8H), 6.83 (d, J = 8.0 Hz, 4H), 4.71 (s, 4H), 3.73 (d, J = 15.2 Hz, 4H), 3.55 (d, J = 15.2 Hz, 4H), 1.56 (s, 2H); <sup>13</sup>C NMR (100 MHz, CDCl<sub>3</sub>) δ = 141.7, 138.7, 133.8, 133.2, 132.5, 130.0, 129.4, 128.1, 128.1, 128.0, 128.0, 127.7, 127.4, 126.3, 126.2, 126.1, 125.6, 125.6, 125.3, 124.7, 123.2, 119.0, 60.2, 50.3, 39.8. IR (neat, cm<sup>-1</sup>): 3433, 3056, 3026, 2922, 2852, 1630, 1507, 1494, 1452, 1433, 1384, 1349, 1298, 1256, 1183, 1150, 1110, 1074, 1028, 888, 829, 783, 748, 716, 699 cm<sup>-1</sup>. Exact mass calcd for C<sub>70</sub>H<sub>56</sub>N<sub>2</sub>O<sub>2</sub> [M+H]<sup>+</sup>, 957.4420. Found 957.4372.

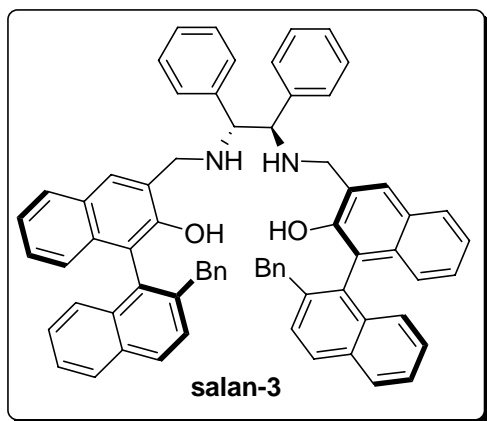

Using the same method, (1*R*,2*R*)-(-)-1,2-Diphenyl-1,2-ethanediamine can give **salan-3** (1.91 g, >99% yield) as a gray solid. <sup>1</sup>H NMR (400 MHz, CDCl<sub>3</sub>) δ = 7.37 (d, J = 8.8 Hz, 6H), 7.15 (d, 11H), 7.07 (s, 7H), 7.01 (t, J = 8.4 Hz, 6H), 6.92 (t, J = 7.2 Hz, 8H), 6.80 (d, J = 8.0 Hz, 4H), 4.68 (s, 4H), 3.70 (d, J = 15.2 Hz, 4H), 3.52 (d, J = 15.2 Hz, 4H), 1.53 (s, 2H); <sup>13</sup>C NMR (100 MHz, CDCl<sub>3</sub>) δ = 142.3, 139.3, 134.8, 134.2, 133.5, 131.0, 130.3, 129.1, 129.1, 129.0, 129.0, 128.7, 128.4, 127.3, 127.2, 127.1, 126.6, 126.6, 126.3, 125.7, 124.2, 120.0, 61.2, 51.3, 40.8. IR (neat, cm<sup>-1</sup>): 3435, 3056, 3026, 2922, 2852, 1629, 1506, 1494, 1452, 1433, 1384, 1349, 1255, 1183, 1149,

1110, 1027, 917, 889, 830, 804, 782, 748, 715, 699  $\text{cm}^{-1}$ . Exact mass calcd for  $\text{C}_{70}\text{H}_{56}\text{N}_2\text{O}_2$   $[\text{M}+\text{H}]^+$ , 957.4420. Found 957.4363.

## 2.9 The Synthesis of Salen-5 Ligands

Similarly to the synthesis of salan ligand (1-3), the general procedure for the synthesis of salen ligand 5 (5a-c):

To a solution of (1*R*, 2*R*)-diaminocyclohexane tartrate (0.66 g, 2.5 mmol) and  $\text{K}_2\text{CO}_3$  (0.7 g, 5 mmol) in 50% ethanol (12 mL) were added slowly the Ar-BINMOL-derived aldehyde (1.94 g, 5 mmol) in ethanol (24 mL) at room temperature. After the addition, the solution was allowed to stir at room temperature for 48 hrs. The precipitate was collected by filtration, washed with ice ethanol, and dried in vacuum oven to obtain the product **5a** (2.03 g, 95% yield) as a pale yellow power.

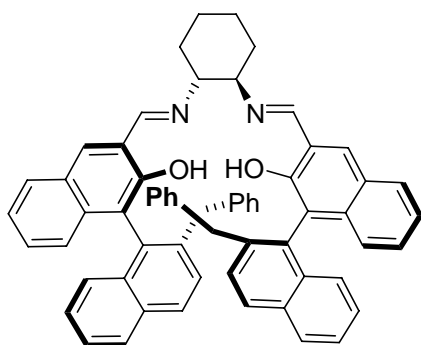

**(R, R, S, S)-5a:**  $^1\text{H-NMR}$  (500 MHz,  $\text{CDCl}_3$ )  $\delta$ : 12.99 (s, 2 H), 8.40 (s, 2 H), 7.85-7.87 (d,  $J = 11.5$  Hz, 4 H), 7.69-7.73 (t,  $J = 10$  Hz, 4 H), 7.42-7.44 (d,  $J = 11$  Hz, 2 H), 7.31-7.35 (t,  $J = 10$  Hz, 2 H), 7.15-7.26 (m, 4 H), 6.92-7.00 (m, 8 H), 6.84-6.97 (m, 8H), 3.73-3.83 (dd,  $J = 19, 27$  Hz, 4 H), 3.26-3.28 (t,  $J = 4$  Hz, 2H), 1.94-1.97 (d,  $J = 16.5\text{Hz}$ , 2H), 1.83-1.86 (d,  $J = 11\text{Hz}$ , 2 H), 1.66-1.68 (d,  $J = 12$  Hz, 2H), 1.39-1.44 (t,  $J = 12.5\text{Hz}$ , 2H);  $^{13}\text{C NMR}$  (125 MHz,  $\text{CDCl}_3$ )  $\delta$ : 165.2, 154.5, 138.7, 136.1, 135.4, 135.0, 133.4, 133.2, 132.6, 132.0, 129.3, 129.0, 128.9, 128.4, 128.1, 127.5, 126.2, 126.0, 125.2, 124.9, 123.4, 120.6, 119.5, 73.2, 60.5, 39.5, 32.9, 24.2, 21.1, 14.3.

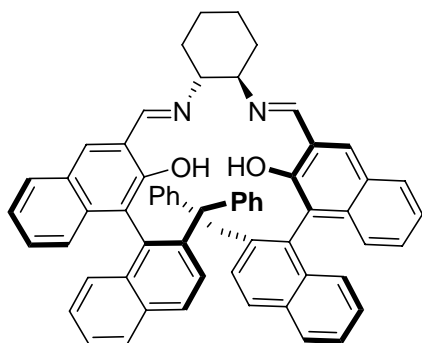

**(R, R, R, R)- 5d:**  $^1\text{H-NMR}$  (500 MHz,  $\text{CDCl}_3$ )  $\delta$ : 13.29 (s, 2H), 8.39 (s, 2H), 7.89-7.90 (m, 4H), 7.38-7.42 (m, 6H), 7.32-7.34 (d,  $J = 8.0$  Hz, 2H), 7.25-7.26 (m, 4H), 7.10-7.14 (m, 10H), 7.00-7.02 (d,  $J = 6.5$ , 4H), 6.91-6.92 (d,  $J = 8.0$  Hz, 2H), 3.72-3.75 (d,  $J = 15.0$  Hz, 2H), 3.58-3.61 (d,  $J = 15.0$  Hz, 2H), 3.33-3.35 (t,  $J = 5.0$  Hz, 2H), 2.04-2.07 (d,  $J = 13.5$  Hz, 2H), 1.90-1.91 (d,  $J = 8.5$  Hz, 2H), 1.76 -1.78 (d,  $J = 10.0$  Hz, 2H), 1.47-1.50 (d,  $J = 10.0$  Hz, 2H);  $^{13}\text{C NMR}$  (125 MHz,  $\text{CDCl}_3$ )  $\delta$ : 165.1, 154.2, 141.3, 138.6, 135.3, 133.2, 133.0, 132.5, 131.9, 129.6, 128.8, 128.2, 128.17, 128.12, 128.06, 128.0, 126.2, 125.7, 124.6, 123.2, 120.3, 119.3, 73.2, 39.6, 32.5, 24.1.

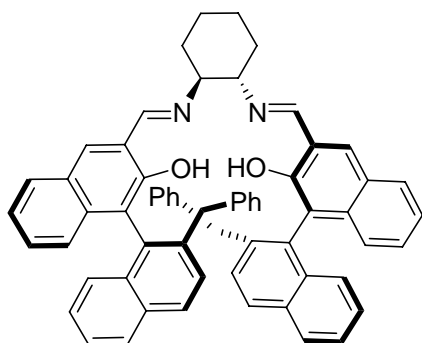

**(S, S, R, R)-5e:**  $^1\text{H NMR}$  (500 MHz,  $\text{CDCl}_3$ )  $\delta$ : 13.09- 13.11 (m, 2H), 8.49 - 8.51 (m, 2H), 7.93-7.94 (m, 4H), 7.78 - 7.81 (m, 4H), 7.52 - 7.55 (m, 2H), 7.42-7.43 (m, 2H), 7.33-7.34 (m, 2H), 7.26-7.27 (m, 2H), 6.94 -7.16 (m, 16H), 3.87-3.91 (m, 4H), 3.37 (s, 2H), 2.03-2.06 (d,  $J = 12.0$  Hz, 2H), 1.93 (s, 2H), 1.77 (s, 2H), 1.51 (s, 2H);  $^{13}\text{C NMR}$  (125 MHz,  $\text{CDCl}_3$ )  $\delta$  : 165.1, 154.5, 141.1, 138.4, 135.3, 135.3, 135.3, 133.1, 132.1, 129.4, 128.9, 128.4, 128.1, 128.06, 127.4, 126.2, 125.9, 125.7, 125.3, 124.8, 123.3, 120.5, 119.4, 73.2, 40.0, 32.8, 24.2.

The synthesis of **(R,R,S,S)-5b-c** was similarly to that of **5a**, and the characterization of product **5b-c** was shown as following:

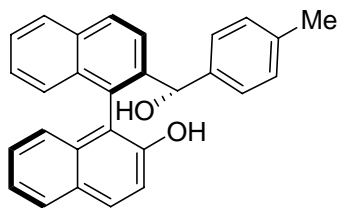

**The characterization of product 5b-a (intermediate 1):**  $^1\text{H}$  NMR (500 MHz,  $\text{CDCl}_3$ )  $\delta$ : 7.87-7.93 (m, 4H), 7.50-7.64 (m, 2H), 7.17-7.37 (m, 5H), 6.90-6.95 (m, 5H), 6.57 (s, 1H), 5.70 (s, 1H), 3.42 (s, 1H), 2.28 (s, 3H);  $^{13}\text{C}$  NMR (125 MHz,  $\text{CDCl}_3$ )  $\delta$  : 151.4, 141.5, 139.6, 136.6, 134.2, 133.1, 130.1, 129.4, 129.1, 128.7, 128.1, 128.09, 126.7, 126.6, 126.4, 126.1, 125.2, 123.5, 118.1, 117.4, 73.3, 21.0.

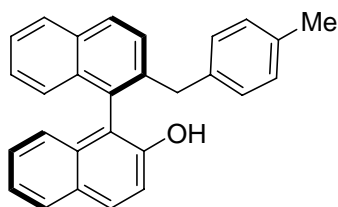

**The characterization of product 5b-b (intermediate 2):**  $^1\text{H}$  NMR (500 MHz,  $\text{CDCl}_3$ )  $\delta$ : 7.87-7.94 (m, 4 H), 7.44 - 7.53 (m, 2 H), 7.21-7.35 (m, 5H), 6.95-7.02 (m, 3 H), 6.81 - 6.8 (d,  $J = 7.6$  Hz, 2H), 4.72 (s, 1H), 3.74 (s, 2H), 2.25 (s, 3H);  $^{13}\text{C}$  NMR (125 MHz,  $\text{CDCl}_3$ )  $\delta$ : 151.2, 140.7, 137.3, 135.5, 133.7, 133.3, 132.7, 130.0, 129.3, 129.2, 129.0 128.98, 128.8, 128.3, 128.2, 127.0, 126.7, 125.9, 124.7, 123.5, 117.5, 117.4, 39.3, 21.0.

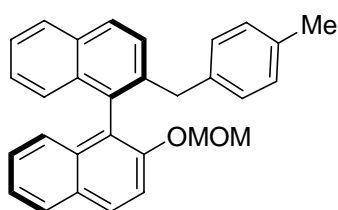

**The characterization of product 5b-c (intermediate 3):**  $^1\text{H}$  NMR (500 MHz,  $\text{CDCl}_3$ )  $\delta$ : 8.02-8.04 (d,  $J = 8.4$  Hz, 1H), 7.93-7.95 (m, 3H), 7.65-7.68 (d,  $J = 8.8$  Hz, 1H), 7.51 - 7.53 (d,  $J = 8.8$  Hz, 1H), 7.40 - 7.48 (m, 2H), 7.26-7.29 (m, 3H), 7.14-7.16 (d,  $J = 8.8$  Hz, 1H), 7.00 - 7.02 (d,  $J = 8.0$  Hz, 2H), 6.91-6.93 (d,  $J = 8.0$  Hz, 2H), 5.04-5.06 (d,  $J = 7.2$  Hz, 1H), 4.96 - 4.97 (d,  $J = 7.2$  Hz, 1H), 3.18 (s, 2H), 3.21 (s, 3H), 2.32 (s, 3H);  $^{13}\text{C}$  NMR (125 MHz,  $\text{CDCl}_3$ )  $\delta$ : 152.7, 138.4, 138.0, 135.1, 134.0, 133.4, 132.6, 132.4, 129.8 129.6, 129.2, 128.8, 127.9, 127.93, 127.8, 126.6, 126.3, 126.0, 125.2,

124.1, 122.9, 116.6, 94.8, 55.8, 39.4, 21.0.

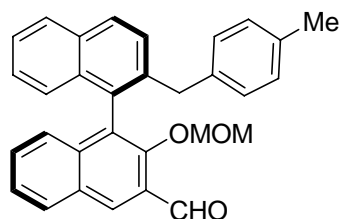

**The characterization of product 5b-d (intermediate 4):**  $^1\text{H}$  NMR (500 MHz,  $\text{CDCl}_3$ )  $\delta$ : 10.67 (s, 1H), 8.65(s, 1H), 8.06- 8.08 (d,  $J = 8.0$  Hz, 1H), 7.93-7.97 (t,  $J = 8.0$  Hz, 2H), 7.52-7.54 (d,  $J = 8.4$  Hz, 1H), 7.45-7.49 (t,  $J = 7.2$  Hz, 2H), 7.24-7.33 (m, 3H), 7.10-7.12 (d,  $J = 8.8$  Hz, 1H), 6.92-6.94 (d,  $J = 8.0$  Hz, 2H), 6.83 -6.85 (d,  $J = 7.8$  Hz, 2H), 4.73-4.83 (d,  $J = 6.0$  Hz, 1H), 4.61-4.62 (d,  $J = 6.0$  Hz, 1H), 3.94 -3.97 (d,  $J = 11.2$  Hz, 1H), 3.79-3.83 (d,  $J = 11.2$  Hz, 1H), 3.07 (s, 3H), 2.26 (s, 3H);  $^{13}\text{C}$  NMR (125MHz,  $\text{CDCl}_3$ )  $\delta$ : 153.2, 139.3, 137.0 135.3, 133.4, 132.3, 132.3, 131.8, 131.0, 130.2, 129.2, 129.15, 129.0, 128.9, 128.6, 128.2, 128.09, 126.5, 126.3, 126.26, 126.0, 125.5, 99.9, 57.0, 39.6, 21.0.

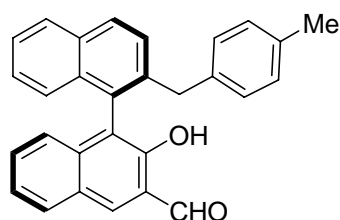

**The characterization of product S5b-e (intermediate 5):**  $^1\text{H}$  NMR (500 MHz,  $\text{CDCl}_3$ )  $\delta$ : 10.45 (s 1H), 10.19 (s, 1H), 8.32 (s, 1H), 7.96-8.00 (d,  $J = 6.8$ , 1H), 7.92-7.94 (m, 2H), 7.23-7.51 (m, 6H), 7.10-7.12 (d,  $J = 8.0$  Hz, 1H), 6.94-6.96 (d,  $J = 8.0$  Hz, 2H), 6.87- 6.89 (d,  $J = 8.0$  Hz, 2H), 3.75-3.85 (dd,  $J = 15.2, 21.2$  Hz, 2H), 2.27 (s, 3H);  $^{13}\text{C}$  NMR (125 MHz,  $\text{CDCl}_3$ )  $\delta$ : 196.8, 153.4, 138.0 137.9, 137.7, 135.3, 133.0, 132.6, 130.6, 130.5, 129.8, 129.2, 128.9, 128.5, 128.3, 128.2, 127.6, 126.4, 125.4, 124.4, 122.1, 120.9, 39.5, 21.0.

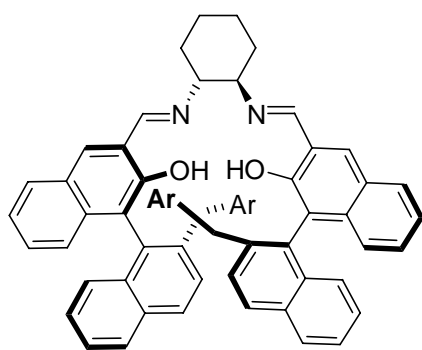

**5b:** Ar = *p*-MePh

**The characterization of product (*R,R,S,S*)-5b:**  $^1\text{H}$  NMR (500 MHz,  $\text{CDCl}_3$ )  $\delta$ : 8.93-8.94 (d,  $J = 8.5$  Hz, 2H), 7.9 (s, 4H), 7.81-7.84 (m, 4H), 7.55-7.58 (m, 2H), 7.44-7.46 (m, 2H), 7.34-7.37 (m, 2H), 7.29-7.32 (m, 2H), 7.17-7.20 (m, 2H), 7.09-7.12 (m, 2H), 6.95-7.02 (m, 10H), 4.22-4.25 (m, 2H), 3.85-3.92 (m, 2H), 3.41 (d,  $J = 1.0$  Hz, 2H), 2.33-2.34 (d,  $J = 3.5$  Hz, 6H), 1.95-1.96 (d,  $J = 4.5$  Hz, 2H), 1.81 (s, 2H), 1.35-1.41 (m, 4H).  $^{13}\text{C}$  NMR (125 MHz,  $\text{CDCl}_3$ )  $\delta$  : 165.2, 154.5, 138.7, 135.4, 135.0, 133.4, 133.2, 132.6, 132.0, 129.3, 129.0, 128.9, 128.4, 128.1, 127.5, 126.2, 126.0, 125.2, 124.9, 123.4, 120.6, 119.5, 60.5, 39.5, 32.9, 24.2, 21.1, 14.3;

**The synthesis and characterization of product (*R,R,S,S*)-5c:**

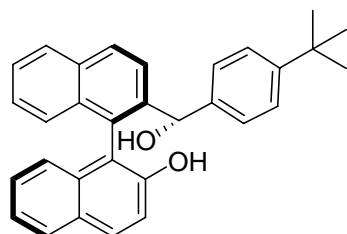

**The characterization of product 5c-a(intermediate 1):**  $^1\text{H}$  NMR (400MHz, $\text{CDCl}_3$ ): 1.24 (s, 9 H), 2.91 (s, 1 H), 5.31 (s,  $\text{CH}_2\text{Cl}_2$ ), 5.54 (s, 1 H), 5.76 (s, 1 H), 6.25 (d,  $J = 8.4$  Hz, 1 H), 6.83 (d,  $J = 8.4$  Hz, 2 H), 7.06 (t,  $J = 8.0$  Hz, 3 H), 7.19 (d,  $J = 8.4$  Hz, 1 H), 7.26-7.31 (m, 3 H), 7.49 (t,  $J = 8.0$  Hz, 1 H), 7.70 (d,  $J = 8.4$  Hz, 1 H), 7.88 (dd,  $J = 8.8, 16.0$  Hz, 4 H) ;  $^{13}\text{C}$  NMR (100 MHz,  $\text{CDCl}_3$ ): 31.3, 34.4, 53.5, 73.3, 117.1, 117.9, 123.5, 124.9, 124.97, 125.05, 125.9, 126.38, 126.44, 126.8, 127.9, 128.1, 129.0, 129.5, 129.7, 130.1, 133.1, 133.4, 134.0, 139.4, 141.7, 149.99, 151.1.

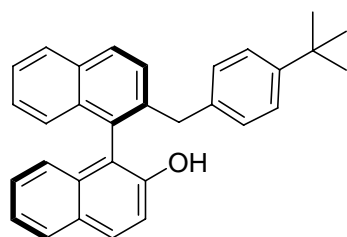

**The characterization of product 5c-b (intermediate-2):**  $^1\text{H}$  NMR (500 MHz,  $\text{CDCl}_3$ )  $\delta$ : 7.94-8.04 (m, 4H), 7.59-7.61 (dd,  $J_1 = 2.0$  Hz,  $J_2 = 8.5$  Hz, 1H), 7.53-7.55 (m, 1H), 7.45-7.47 (m, 1H), 7.36-7.42 (m, 3H), 7.23-7.29 (m, 3H), 7.08-7.10 (d,  $J = 8.5$ Hz, 1H), 6.94-6.96 (m, 2H), 5.00 (s, 1H), 3.86 (s, 2H), 1.37-1.38 (d,  $J = 4.0$  Hz, 9H);  $^{13}\text{C}$  NMR (125 MHz,  $\text{CDCl}_3$ )  $\delta$  : 151.3, 148.8, 140.7, 137.3, 133.9, 133.5, 132.8, 130.1, 129.3, 129.2, 128.9, 128.6, 128.2, 127.0, 126.04, 126.0, 125.3, 124.9, 123.5, 117.7, 117.5, 39.4, 34.4, 31.5;

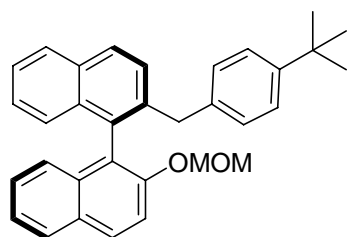

**The characterization of product 5c-c (intermediate-3):**  $^1\text{H}$  NMR (500 MHz,  $\text{CDCl}_3$ )  $\delta$ : 7.95-8.06 (m, 4H), 7.60-7.70 (m, 2H), 7.40-7.49 (m, 2H), 7.21-7.32( m, 5H), 7.13-7.17 (m, 1H), 6.93-6.97 (m, 2H), 5.03-5.06 (m, 1H), 4.93-4.96 (m, 1H), 3.86-3.89 (m, 2H), 3.22-3.23 (m, 3H), 1.35-1.37 (m, 9H);  $^{13}\text{C}$  NMR (125 MHz,  $\text{CDCl}_3$ )  $\delta$  : 165.1, 154.2, 141.3, 138.6, 135.3, 133.2, 133.0, 132.5, 131.9, 129.6, 128.8, 128.2, 128.2, 128.1, 128.1, 128.0, 127.2, 126.2, 125.7, 125.2, 124.6, 123.2, 120.3, 119.3, 73.2, 39.6, 32.5, 24.1;

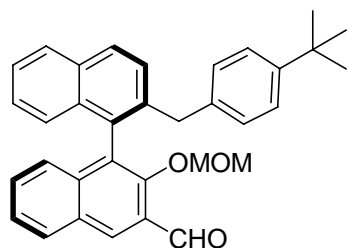

**The characterization of product 5c-d (intermediate-4):**  $^1\text{H}$  NMR (400 MHz,  $\text{CDCl}_3$ )  $\delta$ : 10.64 (s, 1H), 8.62 (s, 1H), 8.04 (s, 1H), 7.92-8.02 (m, 2H), 6.98-7.31 (m, 9H), 6.77 (d,  $J = 8.4$  Hz, 2H), 4.57-4.71 (m, 2H), 3.80-3.96 (m, 2H), 2.96 (s, 3H), 1.24 (s, 9H);  $^{13}\text{C}$  NMR (100 MHz,  $\text{CDCl}_3$ ): 191.1, 153.1, 148.5, 139.2, 127.1, 137.0, 133.4, 14 / 99

132.3, 131.8, 131.1, 130.0, 129.1, 129.0, 128.7, 128.6, 128.4, 128.1, 126.3, 126.2, 126.0, 125.4, 124.9, 99.9, 39.7, 34.3, 31.4.

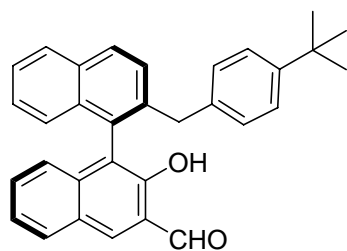

**The characterization of product 5c-e (intermediate-5):**  $^1\text{H}$  NMR (500 MHz,  $\text{CDCl}_3$ )  $\delta$ : 10.43-10.45 (m, 1 H), 10.91 (s, 1 H), 8.31 (s, 1 H), 7.96-7.99 (s, 3 H), 6.87-7.60 (m, 11 H), 3.84-3.85 (m, 2 H), 1.29-1.31 (m, 9 H);  $^{13}\text{C}$  NMR (125 MHz,  $\text{CDCl}_3$ )  $\delta$  : 196.7, 153.4, 148.5, 138.8, 137.95, 137.88, 137.6, 133.0, 132.6, 130.7, 130.4, 129.8, 128.8, 128.5, 128.3, 127.5, 12.4, 125.8, 125.3, 125.0, 122.1, 120.9, 39.6, 34.3, 31.4.

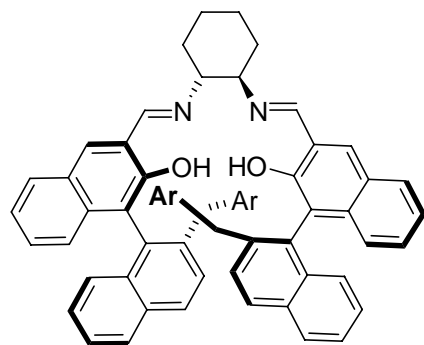

**5c:** Ar = *p-t*-BuPh

**The characterization of product (*R,R,S,S*)-5c/(Salen-5c):**  $^1\text{H}$  NMR (500 MHz,  $\text{CDCl}_3$ )  $\delta$ : 13.4 (s, 2H), 8.35 (s, 2H), 7.88-7.90 (dd,  $J = 3.0$  Hz, 8.5 Hz, 4H), 7.47-7.49 (d,  $J = 8.5$  Hz, 2H), 7.38- 7.42 (m, 2H), 7.29 (s, 2H), 7.22-7.23 (d,  $J = 3.5$  Hz, 4H), 7.10-7.12 (dd,  $J = 2.0$  Hz, 8.5Hz, 6H), 6.90-7.04 (m, 8H), 3.78-3.82 (d,  $J = 15.5$  Hz, 2H), 3.64-3.67 (d,  $J = 15.5$  Hz, 2H), 3.31-3.33 (dd,  $J = 4.0$  Hz, 6.0 Hz, 2H), 2.07-2.10 (d,  $J = 13.5$  Hz, 2H), 1.90-1.92 (d,  $J = 8.5$  Hz, 2H), 1.77-1.79 (m, 2H), 1.47-1.51 (t,  $J = 5.0$  Hz, 2H), 1.27 (s, 18H);  $^{13}\text{C}$  NMR (125 MHz,  $\text{CDCl}_3$ )  $\delta$  :165.2, 154.0, 148.4, 138.8, 138.0, 135.3, 133.2, 132.5, 131.9, 129.2, 128.7, 128.1, 127.2, 126.1, 126.09 ,125.1, 125.0,124.6,123.0, 120.2, 119.4, 39.4, 34.3, 32.3, 31.5, 21.1

### 3. The synthesis of (Salen)Co(III)-X catalysts<sup>[2]</sup>



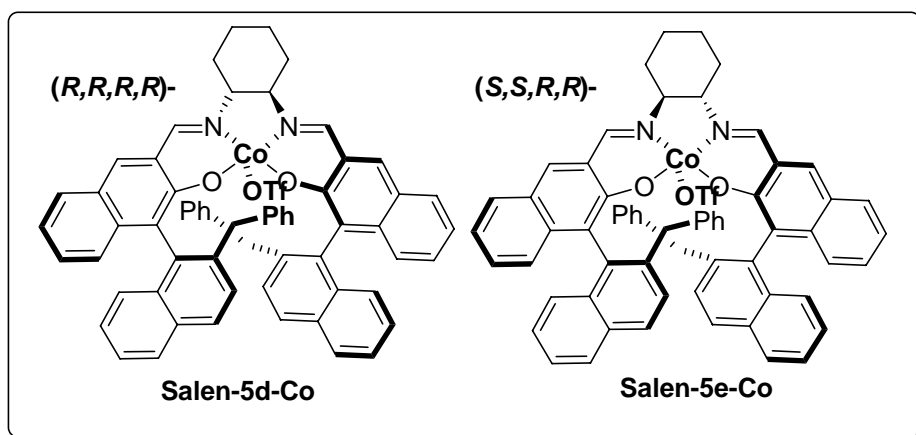

**Typical procedure of synthesis of (Salen)Co-OTf:** deoxygenated toluene (ca. 11.6 mL) was added to salen (0.9405 g, 1.1 mmol) under  $N_2$ , and deoxygenated MeOH (ca. 11.6 mL) to  $Co(OAc)_2 \cdot 4H_2O$  (545 mg, 2.2 mmol) under  $N_2$ .  $N_2$  was bubbled through the resulting solutions for 20 min to ensure complete deoxygenation. The solution of  $Co(OAc)_2 \cdot 4H_2O$  in MeOH (purple) was added via cannula under  $N_2$  to the solution of 5 in toluene (yellow) to give a deep red solution. The resulting mixture was stirred for 30 min under an  $N_2$  purge. Trifluoromethanesulfonic acid (97  $\mu$ L, 1.1 mmol) and  $CH_2Cl_2$  (16.6 mL) were added, and the resulting black solution stirred for an additional 2 h under an air atmosphere with vigorous stirring. Solvent was removed under reduced pressure, and the residue dissolved in minimal  $CH_2Cl_2$ . Excess insoluble  $Co(OAc)_2 \cdot 4H_2O$  was removed via filtration through a Celite<sup>®</sup> pad, washing with  $CH_2Cl_2$  (200 mL). Removal of solvent under reduced pressure provided complex 6 as a paramagnetic black solid (1.108g, >95%).

**(S,S,R,R)-5e salen-Co-OTf:** IR (KBr): 3551, 3473, 3238, 3055, 2930, 2860, 2096, 1714, 1584, 1493, 1388, 1326, 1150, 1029, 957, 780, 638, 488, 408; ESI-MS (m/z):  $[M]^+$  calcd for  $C_{62}H_{48}CoN_2O_2$  911.30 found 911.80.

**(R,R,S,S)-5a salen-Co-OTf:** IR(KBr): 3550, 3415, 3055, 2928, 1646, 1616, 1584, 1493, 1451, 1449, 1326, 1150, 1029, 757, 638, 510, 425; ESI-MS (m/z):  $[M]^+$  calcd for  $C_{62}H_{48}CoN_2O_2$  911.30 found 911.80.

**(R,R,S,S)-5d salen-Co-OTf:** IR (KBr): 3473, 3414, 3055, 2929, 2859, 1616, 1584, 1492, 1450, 1327, 1029, 953, 783, 698, 511, 433. ESI-MS (m/z):  $[M]^+$  calcd for  $C_{62}H_{48}CoN_2O_2$  911.30 found 911.80.

**(R,R,R,R)-5b Co-OTf:** IR (KBr): 3551, 3473, 3415, 3237, 3051, 2926, 2858, 1616, 1584, 1507, 1445, 1347, 1150, 1028, 950, 861, 808, 755, 637, 498, 432; ESI-MS (m/z): [M]<sup>+</sup> calcd for C<sub>64</sub>H<sub>52</sub>CoN<sub>2</sub>O<sub>2</sub> 939.33 found 939.35.

**(R,R,R,R)-5c salen-Co-OTf:** IR(KBr): 3550, 3473, 3415, 3235, 3053, 2958, 2865, 2067, 1910, 1616, 1507, 1387, 1295, 1150, 1115, 1028, 858, 813, 750, 637, 563, 507, 433. ESI-MS (m/z): [M]<sup>+</sup> calcd for C<sub>70</sub>H<sub>66</sub>CoN<sub>2</sub>O<sub>2</sub> 1023.43, found 1023.90.

### Typical procedure of the synthesis of S5a-Co-OAc:

Typical procedure: deoxygenated toluene (ca. 11.6 mL) was added to salen ligand (881 mg, 1.03 mmol) under N<sub>2</sub>, and deoxygenated MeOH (ca. 11.6 mL) to Co(OAc)<sub>2</sub>·4H<sub>2</sub>O (372 mg, 1.5mmol) under N<sub>2</sub>. N<sub>2</sub> was bubbled through the resulting solutions for 20 min to ensure complete deoxygenation. The solution of Co(OAc)<sub>2</sub>·4H<sub>2</sub>O in MeOH (purple) was added via cannula under N<sub>2</sub> to the solution of 5 in toluene (yellow) to give a deep red solution. With stirred, the resulting mixture was reflux for 2h under 80°C. Solvent was removed under reduced pressure, and the residue dissolved in minimal CH<sub>2</sub>Cl<sub>2</sub>. Excess insoluble Co(OAc)<sub>2</sub>·4H<sub>2</sub>O was removed via filtration through a Celite<sup>®</sup> pad, washing with CH<sub>2</sub>Cl<sub>2</sub> (200 mL). Removal of solvent under reduced pressure provided (Salen) Co-OAc as a paramagnetic black solid (701mg, >70%). IR(KBr): 3551, 3474, 3414, 3237, 2925, 2854, 1616, 2361, 1584, 1587, 1551, 1507, 1348, 1148, 961, 802, 744, 716, 617, 503, 431. ESI-MS (m/z): [M]<sup>+</sup> calcd for C<sub>62</sub>H<sub>48</sub>CoN<sub>2</sub>O<sub>2</sub> 911.30, found 911.80.

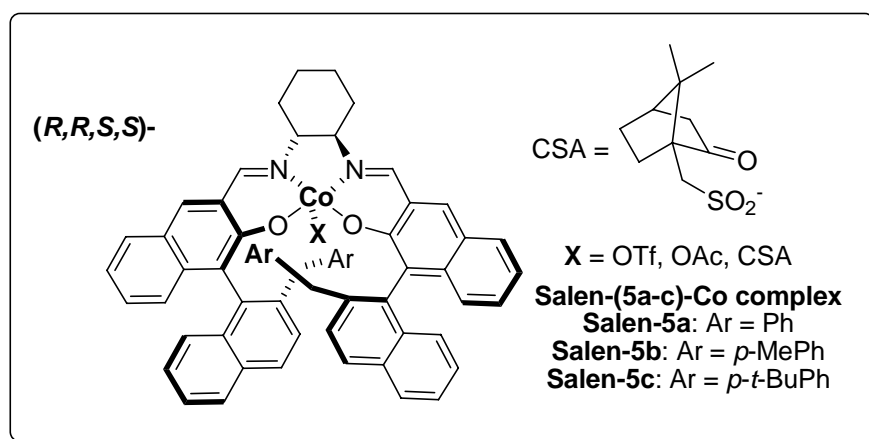

### The synthesis of (R,R,S,S)-5a-Co-OTs:

A degassed solution of  $\text{Co}(\text{OAc})_2 \cdot 4 \text{H}_2\text{O}$  (11.0 mg, 0.044 mmol) in 3 mL MeOH was added to a degassed solution of **5a** (37.7 mg, 0.040 mmol) in 3 mL toluene via a cannula under  $\text{N}_2$ . The combined red solution was purged with  $\text{N}_2$  for 30 min and then LPTS (11.1 mg, 0.040 mmol) was added and followed by 5 mL of  $\text{CH}_2\text{Cl}_2$ . The mixture was stirred exposed to air for 1.5 h and concentrated, re-dissolved in  $\text{CH}_2\text{Cl}_2$  and filtered over Celite<sup>®</sup> pad. The filtrate was concentrated and precipitated in pentane, to filter off a dark green crystalline solid that was air-dried; yield: 24 mg (70%). IR (KBr): 3550, 3472, 3413, 3238, 3054, 2929, 2859, 1714, 1616, 1584, 1492, 1425, 1349, 1123, 956, 757, 622, 567, 488, 433. ESI-MS ( $m/z$ ):  $[\text{M}]^+$  calcd for  $\text{C}_{62}\text{H}_{48}\text{CoN}_2\text{O}_2$  911.30, found 911.80.

#### **The synthesis of (*R,R,S,S*)-5a-Co-OCSA:**

Deoxygenated toluene (ca. 11.6 mL) was added to salen ligand (0.9405 mg, 1.1 mmol) under  $\text{N}_2$ , and deoxygenated MeOH (ca. 11.6 mL) to  $\text{Co}(\text{OAc})_2 \cdot 4\text{H}_2\text{O}$  (545 mg, 2.2 mmol) under  $\text{N}_2$ .  $\text{N}_2$  was bubbled through the resulting solutions for 20 min to ensure complete deoxygenation. The solution of  $\text{Co}(\text{OAc})_2 \cdot 4\text{H}_2\text{O}$  in MeOH (purple) was added via cannula under  $\text{N}_2$  to the solution in toluene (yellow) to give a deep red solution. The resulting mixture was stirred for 30 min under an  $\text{N}_2$  purge. CSA acid (256 mg, 1.1 mmol) and  $\text{CH}_2\text{Cl}_2$  (16.6 mL) were added, and the resulting black solution stirred for an additional 2 h under an air atmosphere with vigorous stirring. Solvent was removed under reduced pressure, and the residue dissolved in minimal  $\text{CH}_2\text{Cl}_2$ . Excess insoluble  $\text{Co}(\text{OAc})_2 \cdot 4\text{H}_2\text{O}$  was removed via filtration through a Celite<sup>®</sup> pad, washing with  $\text{CH}_2\text{Cl}_2$  (200 mL). Removal of solvent under reduced pressure provided salen-**5a**-Co(III)-OCAS as a paramagnetic black solid (856 mg, 82% yield). IR (KBr): 3551, 3475, 3414, 3238, 3055, 2933, 2860, 1732, 1616, 1584, 1492, 1451, 1425, 1326, 1149, 1039, 780, 757, 717, 617, 488, 432. ESI-MS ( $m/z$ ):  $[\text{M}]^+$  calcd for  $\text{C}_{62}\text{H}_{48}\text{CoN}_2\text{O}_2$  911.30, found 911.80.

## **4. General procedure for the asymmetric Henry reactions <sup>[3]</sup>**

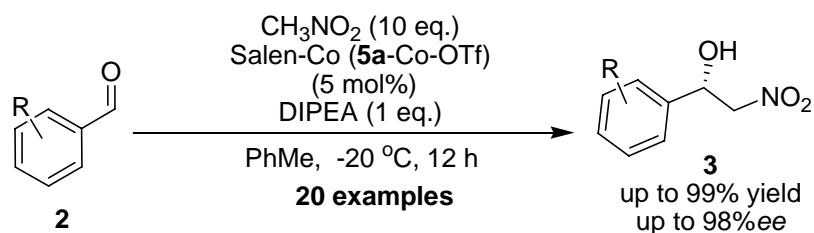

#### 4.1 General procedure for the asymmetric salan-Cu(II)-catalyzed Henry reaction (Cu catalysis)

All reactions were performed on a 1 mmol scale with 10 mol% of Cu salt and 10 mol % of salan ligand (**1**) at a 0.5 M concentration using 10 equiv of nitromethane in EtOH. Reactions were run at 10 °C in a screw-capped vial for 48 h.

A representative procedure: salan ligand **1** (42.9 mg, 0.05 mmol) and Cu(OAc)<sub>2</sub>·H<sub>2</sub>O (10.0 mg, 0.05 mmol) were added to ethanol at ambient temperature. Stirring continued for ten minute and then nitromethane (0.27 mL, 10 mmol) and aromatic aldehyde (0.5 mmol) were added to the solution. After stirring for 48 hours, the mixture was then extracted with DCM and the organic extracts were combined, washed with brine, dried over anhydrous Na<sub>2</sub>SO<sub>4</sub>, and evaporated in vacuo. The residue was purified by column chromatography. All the products are known and confirmed by GC-MS, NMR, and HPLC.

#### 4.2 General procedure for the asymmetric salan-Co(III)-catalyzed Henry reaction (Co catalysis)

**General procedure:** To a screw cap vial containing a stir bar, cobalt complex (26.5 mg, 0.025 mmol, 5% mmol) was added. And then 2 mL toluene, 2-fluorobenzaldehyde (53 μL, 0.5 mmol), and DIPEA (83 μL, 0.5 mmol) was added to the vial. The reaction mixture was cooled down to -20 °C, and then CH<sub>3</sub>NO<sub>2</sub> (0.27 mL, 5 mmol) was added. The mixture was continued to stir at -20 °C for 12 h. The reaction mixture was purified by flash column chromatography on silica gel (*n*-hexane/EtOAc = 10/1) to give the nitroaldol adduct as a colorless oil.

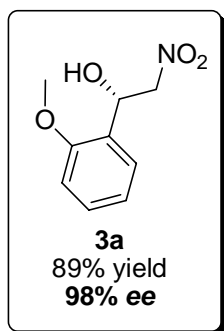

(*S*)-1-(2-Methoxyphenyl)-2-nitroethanol (**3a**) was obtained according to the general procedure (89% yield). Enantiomeric excess was determined by HPLC with a Chiralcel OD-H column (*n*-hexane-isopropanol 85:15 V/V, 0.8 mL/min, 215 nm); minor enantiomer  $t_r = 9.06$  min, major enantiomer  $t_r = 9.75$  min; 98% ee.  $[\alpha]_D^{14} = +26.50^\circ$  ( $c = 0.8$ ,  $\text{CHCl}_3$ );  $^1\text{H NMR}$  (500 MHz,  $\text{CDCl}_3$ )  $\delta$ : 7.42 (d,  $J = 7.0$  Hz, 1 H), 7.32-7.35 (m, 1 H), 7.03 (t,  $J = 7.5$  Hz, 1 H), 6.91 (d,  $J = 8.5$  Hz, 1 H), 5.59-5.62 (m, 1 H), 4.61-4.64 (m, 1 H), 4.53-4.57 (m, 1H), 3.87 (s, 3 H), 3.38 (d,  $J = 6.0$  Hz, 1 H);  $^{13}\text{C NMR}$  (125 MHz,  $\text{CDCl}_3$ )  $\delta$ : 156.0, 129.8, 127.2, 126.0, 121.1, 110.5, 80.0, 67.9, 55.5; IR (KBr): 3549, 3414, 3239, 2940, 2068, 1618, 1553, 1491, 1382, 1287, 1243, 1121, 1075, 1025, 789, 758, 617, 487  $\text{cm}^{-1}$ ;

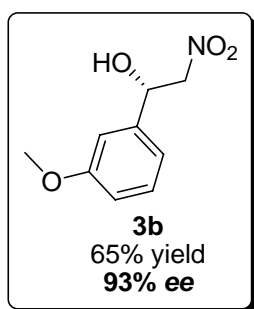

(*S*)-1-(3-Methoxyphenyl)-2-nitroethanol (**3b**) was obtained according to the general procedure (64% yield). Enantiomeric excess was determined by HPLC with a Chiralcel OD-H column (*n*-hexane-isopropanol 90:10 V/V, 0.8 mL/min, 215 nm); minor enantiomer  $t_r = 26.45$  min, major enantiomer  $t_r = 35.29$  min; 93% ee;  $[\alpha]_D^{14} = +9.82^\circ$  ( $c = 0.47$ ,  $\text{CHCl}_3$ ).  $^1\text{H NMR}$  (500 MHz,  $\text{CDCl}_3$ )  $\delta$ : 7.30 (t,  $J = 8.0$  Hz, 1 H), 6.94 (d,  $J = 6.5$  Hz, 2 H), 6.88 (dd,  $J = 2.5$  Hz, 8.5 Hz, 1 H), 5.41 (dd,  $J = 2.5$  Hz, 9.5 Hz, 1 H), 4.56-4.60 (m, 1 H), 4.49 (dd,  $J = 3.0$  Hz, 13.0 Hz, 1 H), 3.81 (s, 3 H), 3.05 (s, 1H);  $^{13}\text{C NMR}$  (125 MHz,  $\text{CDCl}_3$ )  $\delta$ : 160.1, 139.9, 130.1, 118.1, 114.4, 111.6, 81.3, 70.9,

55.3; IR (KBr): 3551, 2918, 2069,1617, 1552, 1488, 1382, 1324, 1125, 1075, 904, 844, 768, 730, 635, 493  $\text{cm}^{-1}$ ;

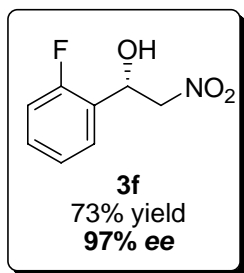

**(S)-1-(2-Fluorophenyl)-2-nitroethanol (3f)** was obtained according to the general procedure (92% yield). Enantiomeric excess was determined by HPLC with a Chiralcel OD-H column (*n*-hexane-isopropanol 95:5 V/V, 1mL/min, 215 nm); minor enantiomer  $t_r = 15.125$  min, major enantiomer  $t_r = 15.711$  min; 97% *ee*.  $[\alpha]_D^{14} = +41.15^\circ$  ( $c = 0.8$ ,  $\text{CHCl}_3$ );  $^1\text{H NMR}$  (500 MHz,  $\text{CDCl}_3$ )  $\delta$ : 7.55 (d,  $J = 7.5$  Hz, 1 H), 7.39 (m, 1 H), 7.22 (d,  $J = 7.5$  Hz, 1 H), 7.12 (m, 1 H), 5.79 (dt,  $J = 8.5, 4.5$  Hz, 1 H), 4.56-4.64 (m, 2 H), 3.39 (d,  $J = 1.1$  Hz, 1 H);  $^{13}\text{C NMR}$  (125 MHz,  $\text{CDCl}_3$ )  $\delta$ : 159.33 (d,  $J_{\text{CF}} = 244.8$  Hz), 130.50 (d,  $J_{\text{CF}} = 8.3$  Hz), 127.62 (d,  $J_{\text{CF}} = 3.5$  Hz), 125.16 (d,  $J_{\text{CF}} = 13.4$  Hz), 124.89 (d,  $J_{\text{CF}} = 2.2$  Hz), 115.62 (d,  $J_{\text{CF}} = 20.9$  Hz), 79.70 (d,  $J_{\text{CF}} = 1.3$  Hz), 65.44 (d,  $J_{\text{CF}} = 2.8$  Hz);  $^{19}\text{F NMR}$  (470 MHz,  $\text{CDCl}_3$ )  $\delta$ : -118.352; IR(KBr): 3422, 2923, 1617, 1588, 1557, 1489, 1457, 1380, 1074, 1033, 897, 809, 762, 739, 615  $\text{cm}^{-1}$ ;

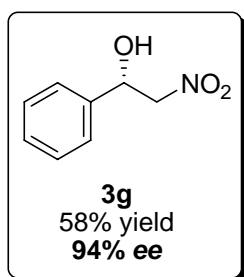

**(S)-1-Phenyl-2-nitroethanol (3g)** was obtained according to the general procedure as colorless oil (56% yield). Enantiomeric excess was determined by HPLC with a Chiralcel OD-H column (*n*-hexane-isopropanol 85:15 V/V, 0.8 mL/min, 215 nm); minor enantiomer  $t_r = 13.06$  min, major enantiomer  $t_r = 15.85$  min; 94% *ee*.  $[\alpha]_D^{14} = +14.07^\circ$  ( $c = 0.8$ ,  $\text{CHCl}_3$ ).  $^1\text{H NMR}$  (500 MHz,  $\text{CDCl}_3$ )  $\delta$ : 7.43 - 7.35 (m, 5H), 5.45 (d,  $J = 10.0$  Hz, 1 H), 4.62-4.57 (m, 1 H), 4.52-4.49 (m, 1 H), 3.00 (s, 1 H).  $^{13}\text{C NMR}$  (125 MHz,  $\text{CDCl}_3$ )  $\delta$ : 138.1, 129.1, 129.0, 126.0, 81.2, 71.0. IR (KBr): 3418, 3032,

2921, 1555, 1495, 1454, 1381, 1128, 1067, 897, 765, 700, 611, 524 cm<sup>-1</sup>;

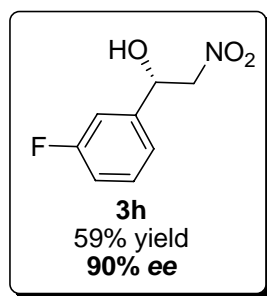

**(S)-1-(3-Fluorophenyl)-2-nitroethanol (3h)** was obtained according to the general procedure (59% yield). Enantiomeric excess was determined by HPLC with a Chiralcel OD-H column (*n*-hexane-isopropanol 85:15 V/V, 0.8 mL/min, 215 nm); minor enantiomer  $t_r = 11.19$  min, major enantiomer  $t_r = 13.14$  min; 90% *ee*.  $[\alpha]_D^{14} = 17.1^\circ$  ( $c = 0.8$ , CHCl<sub>3</sub>); <sup>1</sup>H NMR (500 MHz, CDCl<sub>3</sub>)  $\delta$ : 7.36-7.40 (m, 1H), 7.14-7.18 (m, 2H), 7.07 (td,  $J = 8.5$  Hz, 1H), 5.46 (d,  $J = 9.5$  Hz, 1H), 4.510- 4.60 (m, 2H), 3.33 (s, 1H); <sup>13</sup>C NMR (100 MHz, CDCl<sub>3</sub>)  $\delta$ : 163.02 (d,  $J_{CF} = 196.6$  Hz), 140.63 (d,  $J_{CF} = 5.3$  Hz), 130.73 (d,  $J_{CF} = 6.5$  Hz), 121.57 (d,  $J_{CF} = 2.3$  Hz), 115.90 (d,  $J_{CF} = 16.7$  Hz), 113.12(d,  $J_{CF} = 18$  Hz), 80.99, 70.31 (d,  $J_{CF} = 1$ Hz). <sup>19</sup>F-NMR (470 MHz, CDCl<sub>3</sub>)  $\delta$ : -111.440; IR (KBr): 3419, 2923, 1617, 1594, 1556, 1489, 1457, 1380, 1263, 1138, 1068, 893, 790, 710, 692 cm<sup>-1</sup>;

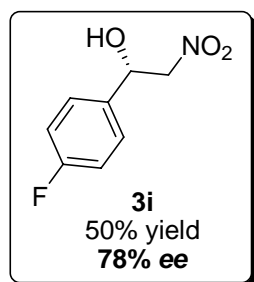

**(S)-1-(4-Fluorophenyl)-2-nitroethanol (3i)** was obtained according to the general procedure (50% yield). Enantiomeric excess was determined by HPLC with a Chiralcel OD-H column (*n*-hexane-isopropanol 85:15 V/V, 0.8 mL/min, 215 nm); minor enantiomer  $t_r = 10.57$  min, major enantiomer  $t_r = 12.40$ min; 78% *ee*.  $[\alpha]_D^{17} = +7.4^\circ$  ( $c 0.33$ , CHCl<sub>3</sub>); <sup>1</sup>H NMR (500 MHz, CDCl<sub>3</sub>)  $\delta$ : 7.37-7.39 (m, 2 H), 7.07-7.10 (m, 2 H), 5.44 (d,  $J = 8.5$  Hz, 1 H), 4.55-4.60 (m, 2 H), 4.49 (dd,  $J = 3.0$  Hz, 13.0 Hz, 1 H), 3.04 (s, 1 H); <sup>13</sup>C NMR (125 MHz, CDCl<sub>3</sub>)  $\delta$ : 162.9 (d,  $J_{CF} = 246.5$  Hz), 134.0,

127.8 (d,  $J_{CF} = 8.1$  Hz), 116.0 (d,  $J_{CF} = 21.6$  Hz), 81.2, 70.3;<sup>19</sup> FNMR (470 MHz,  $CDCl_3$ ): -112.5; IR (KBr): 3420, 2922, 1902, 1688, 1606, 1555, 1511, 1419, 1379, 1225, 1160, 1078, 897, 839, 728, 565, 531  $cm^{-1}$ ;

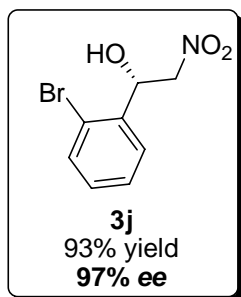

**(S)-1-(2-Bromophenyl)-2-nitroethanol (3j)** was obtained according to the general procedure (93% yield). Enantiomeric excess was determined by HPLC with a Chiralcel OD-H column (*n*-hexane-isopropanol 95:5 V/V, 1.0 mL/min, 215 nm); minor enantiomer  $t_r = 20.87$  min, major enantiomer  $t_r = 22.49$  min; 97% *ee*.  $[\alpha]_D^{14} = +37.16^\circ$  ( $c$  0.8,  $CHCl_3$ );  $^1H$  NMR (500 MHz,  $CDCl_3$ )  $\delta$ : 7.63 (d,  $J = 7.5$  Hz, 1 H), 7.54 (d,  $J = 8.0$  Hz, 1 H), 7.38-7.23 (m, 1 H), 5.77 (d,  $J = 9.5$  Hz, 1 H), 4.64-4.67 (dd,  $J = 2.0$  Hz, 13.5 Hz, 1 H), 4.38-4.43 (m, 1 H), 3.36 (s, 1 H);  $^{13}C$  NMR (125 MHz,  $CDCl_3$ )  $\delta$ : 137.12, 133.0, 130.3, 128.3, 127.8, 121.5, 79.4, 70.1; IR (KBr): 3473, 2921, 1636, 1555, 1468, 1438, 1416, 1377, 1286, 1201, 1125, 1084, 1023, 899, 759, 732, 663, 610, 445  $cm^{-1}$ ;

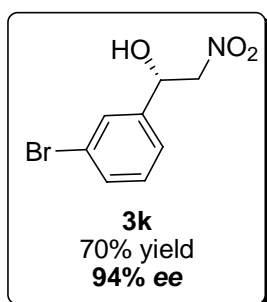

**(S)-1-(3-Bromophenyl)-2-nitroethanol (3k)** was obtained according to the general procedure (70% yield). Enantiomeric excess was determined by HPLC with a Chiralcel OD-H column (*n*-hexane-isopropanol 90:10 V/V, 0.8 mL/min, 215 nm); minor enantiomer  $t_r = 21.73$  min, major enantiomer  $t_r = 28.05$  min; 94% *ee*;  $^1H$  NMR (500 MHz,  $CDCl_3$ ) 7.57 (s, 1 H), 7.49 (d,  $J = 7.5$  Hz, 1H), 7.28-7.33 (m, 2H), 5.41 - 5.44 (m, 1H), 4.48-4.58 (m, 2H), 3.27 (s, 1H);  $^{13}C$  NMR (125 MHz,  $CDCl_3$ )  $\delta$ : 140.3,



132.1, 130.7, 129.1, 124.6, 123.1, 81.0, 70.2; IR (KBr): 3412, 2921, 1594, 1557, 1475, 1400, 1384, 1130, 1072, 898, 787, 694, 616  $\text{cm}^{-1}$ ;

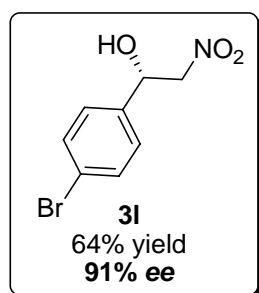

**(S)-1-(4-Bromophenyl)-2-nitroethanol (3l)** was obtained according to the general procedure (64% yield). Enantiomeric excess was determined by HPLC with a Chiralcel OD-H column (*n*-hexane-isopropanol 85:15 V/V, 0.8 mL/min, 215 nm); minor enantiomer  $t_r = 14.57$  min, major enantiomer  $t_r = 19.00$  min, 91% ee;  $[\alpha]_D^{25} = +19.80^\circ$  ( $c = 0.56$ ,  $\text{CHCl}_3$ ).  $^1\text{H}$  NMR (500 MHz,  $\text{CDCl}_3$ )  $\delta$ : 7.50 (d,  $J = 8.5$  Hz, 2 H), 7.24 (d,  $J = 8.5$  Hz, 2 H), 5.37 (dd,  $J = 3.0$  Hz, 9.5 Hz, 1 H), 4.51-4.56 (m, 1H), 4.45 (dd,  $J = 3.5$  Hz, 13.5 Hz, 1 H), 3.17 (s, 1 H);  $^{13}\text{C}$  NMR (125 MHz,  $\text{CDCl}_3$ )  $\delta$ : 137.3, 132.1, 127.7, 122.9, 81.0, 70.3; IR (KBr): 3414, 2068, 1638, 1618, 1558, 1489, 1385, 1129, 1073, 1011, 741, 618, 482  $\text{cm}^{-1}$ ;

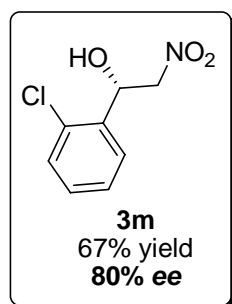

**(S)-1-(2-Chlorophenyl)-2-nitroethanol (3m)** was obtained according to the general procedure (67% yield). Enantiomeric excess was determined by HPLC with a Chiralcel OD-H column (*n*-hexane-isopropanol 85:15 V/V, 0.8 mL/min, 215 nm); minor enantiomer  $t_r = 11.98$  min, major enantiomer  $t_r = 12.40$  min; 80% ee.  $[\alpha]_D^{25} = +21.25^\circ$  ( $c = 0.48$ ,  $\text{CHCl}_3$ );  $^1\text{H}$  NMR (500 MHz,  $\text{CDCl}_3$ )  $\delta$ : 7.65 (dd,  $J = 1.0$  Hz, 7.5 Hz, 1H), 7.28-7.38 (m, 3H), 6.83 (d,  $J = 9.5$  Hz, 1H), 4.66 (dd,  $J = 3.0$  Hz, 13.5 Hz, 1 H), 4.45 (dd,  $J = 9.5$  Hz, 13.5 Hz, 1 H), 4.49 (dd,  $J = 3.0$  Hz, 13.5 Hz, 1H), 3.25 (s, 1H).  $^{13}\text{C}$  NMR (125 MHz,  $\text{CDCl}_3$ )  $\delta$ : 136.7, 131.5, 129.9, 129.7, 127.6, 127.5, 79.4, 67.9;

IR (KBr): 3548, 3417, 2923, 1617, 1556, 1473, 1441, 1417, 1379, 1223, 1086, 1034, 898, 760, 739, 613, 467  $\text{cm}^{-1}$ ;

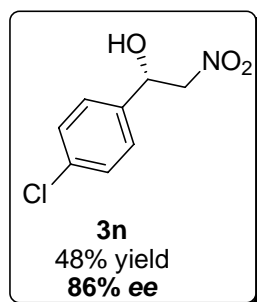

**(S)-1-(4-Chlorophenyl)-2-nitroethanol (3n)** was obtained according to the general procedure (48% yield). Enantiomeric excess was determined by HPLC with a Chiralcel OD-H column (*n*-hexane-isopropanol 90:10 V/V, 0.8 mL/min, 215 nm); minor enantiomer  $t_r = 18.17$  min, major enantiomer  $t_r = 23.45$  min; 86% *ee*.  $[\alpha]_D^{14} = +18.48^\circ$  ( $c = 0.8$ ,  $\text{CHCl}_3$ );  $^1\text{H NMR}$  (500 MHz,  $\text{CDCl}_3$ )  $\delta$ : 7.65 (dd,  $J = 1.0$  Hz, 7.5 Hz, 1H), 7.28-7.38 (m, 3H), 6.83 (d,  $J = 9.5$  Hz, 1H), 4.66 (dd,  $J = 3.0$  Hz, 13.5 Hz, 1H), 4.45 (dd,  $J = 9.5$  Hz, 13.5 Hz, 1H), 4.49 (dd,  $J = 3.0$  Hz, 13.5 Hz, 1H), 3.25 (s, 1H).  $^{13}\text{C NMR}$  (125 MHz,  $\text{CDCl}_3$ )  $\delta$ : 136.7, 134.8, 129.2, 127.4, 81.0, 70.3.

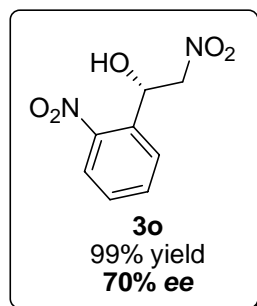

**(S)-(-)-2-Nitro-1-(2-nitrophenyl)ethanol (3o)** was obtained according to the general procedure (99% yield). Enantiomeric excess was determined by HPLC with a Chiralcel OD-H column (*n*-hexane-isopropanol 90:10 V/V, 0.9 mL/min, 215 nm); minor enantiomer  $t_r = 16.95$  min, major enantiomer  $t_r = 18.72$  min, 70% *ee*.  $[\alpha]_{D+}^{25} = 116.40^\circ$  ( $c = 0.7$ ,  $\text{CHCl}_3$ );  $^1\text{H NMR}$  (500 MHz,  $\text{CDCl}_3$ )  $\delta$ : 8.06 (dd,  $J = 1.0$  Hz, 8.5 Hz, 1H), 7.73-7.76 (m, 1H), 7.53-7.56 (m, 1H), 6.03 (d,  $J = 9.0$  Hz), 4.85 (dd,  $J = 2.5$  Hz, 14.0 Hz, 1H), 4.53-4.58 (m, 1H), 3.35 (d,  $J = 4.0$  Hz);  $^{13}\text{C NMR}$  (125 MHz,  $(\text{CD}_3)_2\text{CO}$ ,  $\delta$ ): 147.2, 134.3, 134.1, 129.7, 128.7, 125.0, 80.1, 66.8; IR (KBr): 3550, 3415, 3238, 3081, 1639, 1557, 1518, 1382, 1348, 1082, 859, 838, 754, 618, 485  $\text{cm}^{-1}$ ;

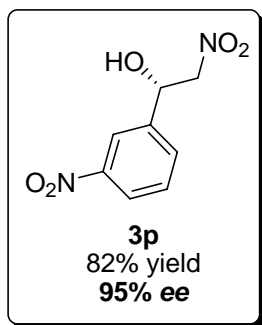

**(S)-(-)-2-Nitro-1-(3-nitrophenyl)ethanol (3p)** was obtained according to the general procedure (82% yield). Enantiomeric excess was determined by HPLC with a Chiralcel OD-H column (*n*-hexane-isopropanol 85:15 V/V, 1mL/min, 215 nm); minor enantiomer  $t_r$  = 16.07 min, major enantiomer  $t_r$  = 18.23 min; 95% *ee*;  $[\alpha]_D^{17} = +53.2^\circ$  ( $c = 0.6$ ,  $\text{CHCl}_3$ ),  $^1\text{H NMR}$  (500 MHz,  $(\text{CD}_3)_2\text{CO}$ )  $\delta$ : 8.41 (s, 1 H), 8.19 (dd,  $J = 2.0$  Hz, 8.5 Hz, 1 H), 7.97 (d,  $J = 7.5$  Hz, 1H), 7.71 (t,  $J = 7.5$  Hz, 1 H), 5.68-5.71 (m, 1H), 5.57 (d,  $J = 4.5$  Hz, 1 H), 4.92 (dd,  $J = 3.5$  Hz, 13 Hz, 1H), 4.72-4.76 (m, 1H);  $^{13}\text{C NMR}$  (125 MHz,  $(\text{CD}_3)_2\text{CO}$ )  $\delta$ : 148.5, 142.7, 132.6, 129.9, 122.9, 121.1, 81.15, 69.6; IR (KBr): 3491, 3097, 2091, 1552, 1525, 1350, 1095, 1070, 919, 808, 735, 684  $\text{cm}^{-1}$ ;

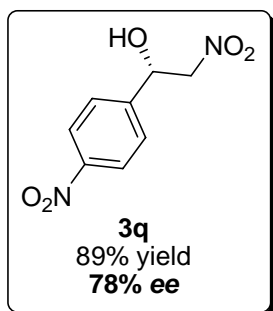

**(S)-2-Nitro-1-(4-nitrophenyl)ethanol (3q)** was obtained according to the general procedure (89% yield). Enantiomeric excess was determined by HPLC with a Chiralcel OD-H column (*n*-hexane-isopropanol 90:10 V/V, 0.8 mL/min, 215 nm); minor enantiomer  $t_r$  = 21.4 min, major enantiomer  $t_r$  = 22.8 min, 78% *ee*;  $[\alpha]_D^{14} = +21.28^\circ$  ( $c 0.8$ ,  $\text{CHCl}_3$ );  $^1\text{H NMR}$  (500 MHz,  $(\text{CD}_3)_2\text{CO}$ )  $\delta$ : 8.22 (d,  $J = 9.0$  Hz, 2H), 7.79 (d,  $J = 8.5$  Hz, 2H), 5.62-5.65 (m, 1H), 4.53 (d,  $J = 4.0$  Hz, 1H), 4.87 (dd,  $J = 3.5$  Hz, 13.0 Hz, 1H), 4.65-4.69 (m, 1H);  $^{13}\text{C NMR}$  (125MHz,  $(\text{CD}_3)_2\text{CO}$ )  $\delta$ : 147.9, 147.6, 127.5, 123.5, 81.1, 69.8, 69.7.

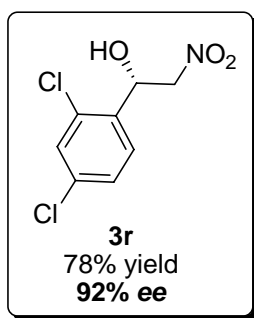

**(S)-1-(2,4-Dichlorophenyl)-2-nitroethanol (3r)** was obtained according to the general procedure (89% yield). Enantiomeric excess was determined by HPLC with a Chiralcel AD-H column (*n*-hexane-isopropanol 90:10 V/V, 0.8 mL/min, 215 nm); minor enantiomer  $t_r = 16.57$  min, major enantiomer  $t_r = 19.95$  min; 92%*ee*.  $[\alpha]_D^{17} = +15.75^\circ$  ( $c = 0.8$ ,  $\text{CHCl}_3$ );  $^1\text{H NMR}$  (500 MHz,  $(\text{CD}_3)_2\text{CO}$ )  $\delta$ : 7.71 (d,  $J = 8.5$  Hz, 1H), 7.45 (d,  $J = 2.0$  Hz, 1 H), 7.42 (dd,  $J = 2.0$  Hz, 7.0 Hz, 1H), 5.77-5.80 (m, 1 H), 5.45- (d,  $J = 5.0$  Hz, 1 H), 4.78 (dd,  $J = 3.0$  Hz, 13.0 Hz, 1 H), 4.49-4.53 (m, 1H).  $^{13}\text{C NMR}$  (125 MHz,  $\text{CDCl}_3$ )  $\delta$ : 136.6, 134.2, 132.1, 129.5, 128.9, 127.8, 79.8, 67.3. IR (KBr): 3551, 3414, 2924, 1638, 1617, 1470, 1384, 1139, 1069, 858, 832  $\text{cm}^{-1}$ .

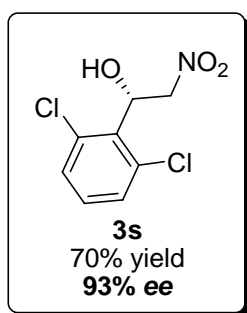

**(S)-1-(2,6-Dichlorophenyl)-2-nitroethanol (3s)** was obtained according to the general procedure (89% yield). Enantiomeric excess was determined by HPLC with a Chiralcel AD-H column (*n*-hexane-isopropanol 90:10 V/V, 0.8 mL/min, 215 nm); minor enantiomer  $t_r = 21.36$  min, major enantiomer  $t_r = 22.59$  min; 93%*ee*;  $[\alpha]_D^{18} = -28.44^\circ$  ( $c = 0.8$ ,  $\text{CHCl}_3$ );  $^1\text{H NMR}$  (500 MHz,  $(\text{CD}_3)_2\text{CO}$ )  $\delta$ : 7.47 (d,  $J = 7.0$  Hz, 2H), 7.38 (dd,  $J = 7.5$  Hz, 9.0 Hz, 1H), 6.37 (dd,  $J = 3.5$  Hz, 10.0 Hz, 1H), 5.30 (dd,  $J = 10.0$  Hz, 14.0 Hz, 1H), 4.78-4.81 (m, 1H), 2.14-2.19 (m, 1H);  $^{13}\text{C NMR}$  (125 MHz,  $(\text{CD}_3)_2\text{CO}$ )  $\delta$ : 140.2, 135.65, 135.59, 135.53, 134.8, 82.9, 73.0; IR (KBr): 3538, 2920, 1617, 1550, 1437, 1380, 1098, 893, 772, 736, 634  $\text{cm}^{-1}$ ;

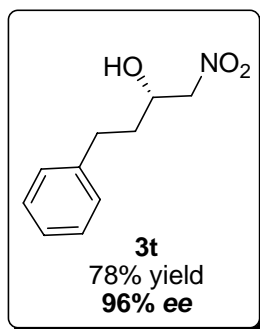

**(S)-1-Nitro-4-phenylbutan-2-ol (3t)** was obtained according to the general procedure (78% yield). Enantiomeric excess was determined by HPLC with a Chiralcel IB column (*n*-hexane-isopropanol 92:8 V/V, 0.8 mL/min, 215 nm); minor enantiomer  $t_r = 36.83$  min, major enantiomer  $t_r = 34.8$  min; 96% *ee*;  $[\alpha]_D^{14} = -10.18$  (c = 0.8, CHCl<sub>3</sub>); <sup>1</sup>H NMR (500 MHz, (CD<sub>3</sub>)<sub>2</sub>CO) δ: 7.24-7.31 (m, 4 H), 7.17-7.20 (m, 1 H), 4.63-4.65 (d, J=6Hz, 1H), 4.57-4.60 (dd, J = 3.5 Hz, 12.5 Hz, 1 H), 4.31-4.47 (dd, J = 2.5, 12.5Hz, 1 H), 4.25-4.28 (m, 1H), 2.83-2.89 (m, 1 H), 2.72-2.78 (m, 1 H), 1.80-1.91 (m, 2H). <sup>13</sup>C NMR (125 MHz, (CD<sub>3</sub>)<sub>2</sub>CO) δ: 141.7, 128.4, 128.3, 125.9, 81.3, 66.0, 35.9, 31.2. IR (KBr): 3551, 3473, 2948, 2068, 1638, 1617, 1558, 1385, 1103, 881, 804 cm<sup>-1</sup>.

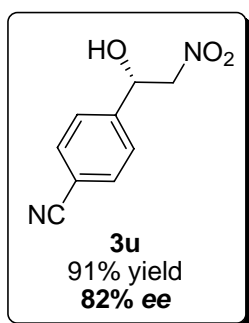

**(S)-1-(4-Cyanophenyl)-2-nitroethanol (3u)** was obtained according to the general procedure (82% yield). Enantiomeric excess was determined by HPLC with a Chiralcel OD-H column (*n*-hexane-isopropanol 90:10 V/V, 1mL/min, 215 nm); minor enantiomer  $t_r = 28.70$  min, major enantiomer  $t_r = 33.73$  min, 83% *ee*.  $[\alpha]_D^{20} = 23.7$ ; <sup>1</sup>H NMR (500 MHz, (CD<sub>3</sub>)<sub>2</sub>CO) δ: 7.82-7.89 (m, 4H), 5.68-5.72 (m, 1H), 5.55 (d, J = 4.5 Hz, 1H), 4.93-4.96 (dd, J = 3.0 Hz, 13.0 Hz, 1 H), 4.75-4.79 (m, 1H). <sup>13</sup>C NMR (125 MHz, (CD<sub>3</sub>)<sub>2</sub>CO) δ: 145.6, 132.4, 127.2, 118.3, 111.8, 81.1, 70.0; IR (KBr): 3415, 2963, 2238, 1638, 1617, 1558, 1382, 1083, 904, 861 cm<sup>-1</sup>;

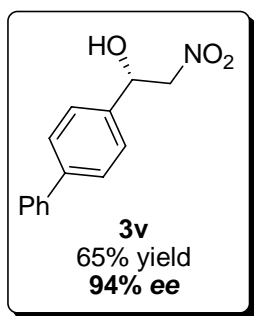

(*S*)-1-(biphenyl-4-yl)-2-nitroethanol (**3v**) was obtained according to the general procedure (50% yield). Enantiomeric excess was determined by HPLC with a Chiralcel OD-H column (*n*-hexane-isopropanol 90:10 V/V, 0.8 mL/min, 215 nm); minor enantiomer  $t_r = 30.94$  min, major enantiomer  $t_r = 37.54$  min; 94% *ee*.  $[\alpha]_D^{25} = -13.48$  ( $c = 0.56$ ,  $\text{CHCl}_3$ ).  $^1\text{H NMR}$  (500 MHz,  $(\text{CD}_3)_2\text{CO}$ )  $\delta$ : 7.67 (t,  $J = 8$  Hz, 4 H), 7.560 (d,  $J = 8.0$  Hz, 2 H), 7.47 (t,  $J = 7.5$  Hz, 2 H), 7.38 (t,  $J = 7.5$  Hz, 1H), 5.55-5.59 (m, 1H), 5.23 (d,  $J = 4.0$  Hz, 1H), 4.81 (dd,  $J = 3.5$  Hz, 12.5Hz, 1 H), 4.67-4.72 (m, 1H);  $^{13}\text{C NMR}$  (125 MHz,  $(\text{CD}_3)_2\text{CO}$ )  $\delta$ : 140.9, 140.5, 139.4, 128.9, 127.5, 127.4, 127.0, 126.9, 126.8, 81.7, 70.5; IR (KBr): 3550, 3475, 3238, 1637, 1617, 1546, 1384, 1123, 1075, 902, 841  $\text{cm}^{-1}$ .

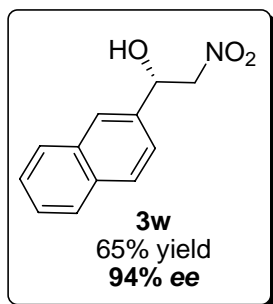

(*S*)-1-(naphthalen-2-yl)-2-nitroethanol (**3w**) was obtained according to the general procedure (65% yield). Enantiomeric excess was determined by HPLC with a Chiralcel OD-H column (*n*-hexane-isopropanol 50:50 V/V, 0.6 mL/min, 215 nm); minor enantiomer  $t_r = 16.13$  min, major enantiomer  $t_r = 22.33$  min; 94% *ee*.  $[\alpha]_D^{20} = +55.19^\circ$  ( $c = 0.8$ ,  $\text{CHCl}_3$ );  $^1\text{H NMR}$  (400 MHz,  $\text{CDCl}_3$ )  $\delta$ : 7.83-7.88 (m, 4 H), 7.53-7.54 (m, 2 H), 7.45 (d,  $J = 8.5$  Hz, 1H), 5.59 (d,  $J = 10.0$  Hz, 1H), 4.55-4.69 (m, 2 H), 2.81 (s, 1 H).  $^{13}\text{C NMR}$  (125 MHz,  $\text{CDCl}_3$ )  $\delta$ : 135.6, 133.4, 133.2, 129.0, 128.1, 127.8, 126.7, 126.6, 125.3, 123.3, 81.2, 71.2; IR (KBr): 3478, 3415, 2938, 1618, 1551, 1412, 1165, 109, 903, 868, 829  $\text{cm}^{-1}$ .

## References

- [1] a) F. Li, Z. J. Zheng, J. Y. Shang, K. Z. Jiang, G. Q. Lai, J. X. Jiang, L. W. Xu, *Chem. Asian J.* **2012**, *7*, 2008-2014; b) F. Li, L. Li, W. Yang, L. S. Zheng, Z. J. Zheng, K. Z. Jiang, Y. Lu, L. W. Xu, *Tetrahedron Lett.* **2013**, *54*, 1584-1588; c) L. S. Zheng, L. Li, K. F. Yang, Z. J. Zheng, X. Q. Xiao, L. W. Xu, *Tetrahedron* **2013**, *69*, 8777-8784; d) G. Gao, F. L. Gu, J. X. Jiang, K. Jiang, C. Q. Sheng, G. Q. Lai, L. W. Xu, *Chem. Eur. J.* **2011**, *17*, 2698-2703.
- [2] a) X. Zheng, C. W. Jones, M. Weck, *Adv. Synth. Catal.* **2008**, *350*, 255-261; b) P. Yan, H. W. Jing, *Adv. Synth. Catal.* **2009**, *351*, 1325-1332; c) A. Sadhukhan, N. H. Khan, T. Roy, R. I. Kureshy, S. H. R. Abdi, H. C. Bajaj, *Chem. Eur. J.* **2012**, *18*, 5256-5260; d) J. M. Ready, E. N. Jacobsen, *J. Am. Chem. Soc.* **2001**, *123*, 2687-2688.
- [3] For selected examples, see: a) T. Ooi, K. Doda, K. Maruoka, *J. Am. Chem. Soc.* **2003**, *125*, 2054-2055; b) B. M. Choudary, K. V. S. Ranganath, U. Pal, M. L. Kantam, B. Sreedhar, *J. Am. Chem. Soc.* **2005**, *127*, 13167-13171; c) T. Arai, M. Watanabe, A. Fujiwara, N. Yokoyama, A. Yanagisawa, *Angew. Chem. Int. Ed.* **2006**, *45*, 5978-5981; d) M. Bandini, F. Piccinelli, S. Tommasi, A. Umani-Ronchi, C. Ventrici, *Chem. Commun.* **2007**, 616-618; e) Y. Xiong, F. Wang, X. Huang, Y. Wen, X. Feng, *Chem. Eur. J.* **2007**, *13*, 829-833; f) N. Sanjeevakumar, M. Periasamy, *Tetrahedron: Asymmetry* **2009**, *20*, 1824-1847; g) W. Jin, X. Li, Y. Huang, F. Wu, B. Wan, *Chem. Eur. J.* **2010**, *16*, 8259-8261; h) K. Kodama, K. Sugawara, T. Hirose, *Chem. Eur. J.* **2011**, *17*, 13584-13592; i) B. V. S. Reddy, J. George, *Tetrahedron: Asymmetry* **2011**, *22*, 1169-1175; j) G. Lai, F. Guo, Y. Zheng, Y. Fang, H. Song, K. Xu, S. Wang, Z. Zha, Z. Wang, *Chem. Eur. J.* **2011**, *17*, 1114-1117; k) S. Milner, T. S. Thomas, A. R. Maguire, *Eur. J. Org. Chem.* **2012**, 3059-3067; l) K. Xu, G. Y. lai, Z. G. Zha, S. S. Pan, H. W. Chen, Z. Y. Wang, *Chem. Eur. J.* **2012**, *18*, 12357-12362; m) R. Boobalan, G. H. Lee, C. P. Chen, *Adv. Synth. Catal.* **2012**, *354*, 2511-2520; n) D. D. Qin, W. H. Lai, D. Hu, Z. Chen, A. A. Wu, Y. P. Ruan, Z. H. Zhou, H. B. Chen, *Chem. Eur. J.* **2012**, *18*, 10515-10518; o) T. Nitabaru, N. Kumagai, M. Shibasaki, *Angew. Chem. Int. Ed.* **2012**, *51*, 1644-1647; p) H. Li, X. Zhang, X. Shi, N. Ji, W. He, S. Y. Zhang, B. L. Zhang, *Adv. Synth. Catal.* **2012**, *354*, 2264-2274; q) D. D. Qin, W. Yu, J. D. Zhou, Y. C. Zhang, Y. P. Ruan, Z. H. Zhou, H. B. Chen, *Chem. Eur. J.* **2013**, *19*, 16541-116544; r) S. Kitagaki, T. Ueda, C. Mukai, *Chem. Commun.* **2013**, *49*, 4030-4032; s) H. X. He, W. Yang, D. M. Du, *Adv. Synth. Catal.* **2013**, *355*, 1137-1148.

**Table S1.** The effect of aromatic compound on the catalytic Henry reaction of substituted aromatic aldehydes

Reaction scheme showing the catalytic Henry reaction of substituted aromatic aldehydes (2) to yield the corresponding nitro-substituted alcohol (3) and nitro-substituted alkene (4). Conditions: Salan 1 (10 mol%), Cu(OAc)<sub>2</sub> (10 mol%), additive (10 mol%), EtOH, 48h, 10 °C.

Chemical structures of (R, S)-BINMOL, chalcone, and TBDPS-TBDPS.

| Entry | Time (d) | Additive                 | Conversion (%) | 3/4   | ee/% |
|-------|----------|--------------------------|----------------|-------|------|
| 1     | 2        | PhCl                     | 83 (√)         | 83:0  | 20   |
| 2     | 2        | PhBr                     | 48 (+)         | 0:48  | ---  |
| 3     | 2        | PhI                      | 53 (+)         | 28:25 | 0    |
| 4     | 2        | chalcone                 | 88 (√)         | 14:74 | ---  |
| 5     | 2        | Ph-CH=CH-NO <sub>2</sub> | 75 (√)         | 19:56 | ---  |
| 6     | 5        | TBDPS-TBDPS              | 75 (√)         | 75:0  | 30   |
| 7     | 2        | TBDPS-TBDPS              | 25 (-)         | 25:0  | 40   |
| 8     | 5        | PhMeSiH <sub>2</sub>     | 73 (√)         | 73:0  | 40   |
| 9     | 5        | 1-ethynylbenzene         | 77 (√)         | 77:0  | 34   |
| 10    | 2        | (R)-BINMOL               | 53 (+)         | 14:39 | -    |
| 11    | 2        | PhOH                     | 70 (√)         | 22:48 | 5    |
| 12    | 2        |                          | 46 (+)         | 46:0  | 16   |
| 13    | 2        |                          | 20 (-)         | 20:0  | 44   |
| 14    | 2        |                          | 46 (+)         | 46:0  | 32   |
| 15    | 2        | PhCOOH                   | <10 (-)        | 5:0   | ---  |

<sup>a</sup>All reactions were carried out at -10 °C in a screw-capped vial for 48 h. <sup>b</sup>The conversion was determined by GC-MS, and the catalytic level was divided as Good (>70% yield, √), Moderate (40-70% yield, +), Poor (< 40% yield, -). <sup>c</sup>Enantiomeric excess was determined by HPLC using chiral columns.



**Figure S1.** Benzaldehyde-assisted catalytic Henry reaction of substituted aromatic aldehydes (**a-e**) in accordance with Table 1 (Text)

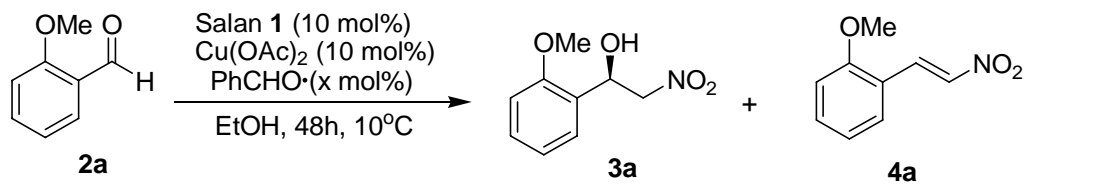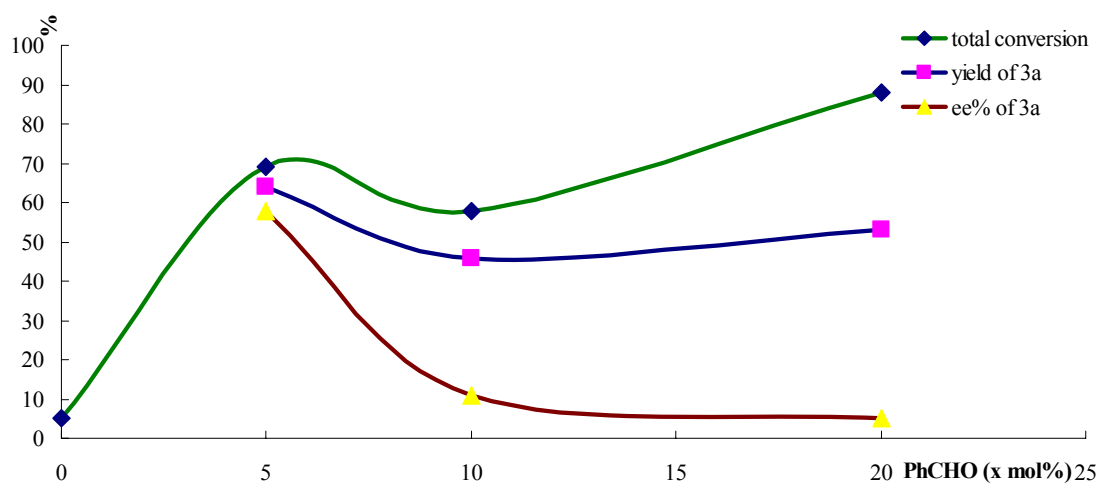

(a)

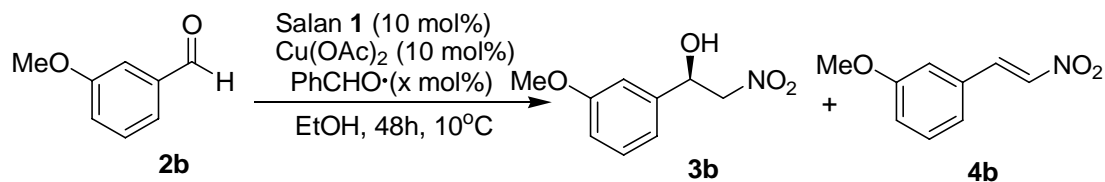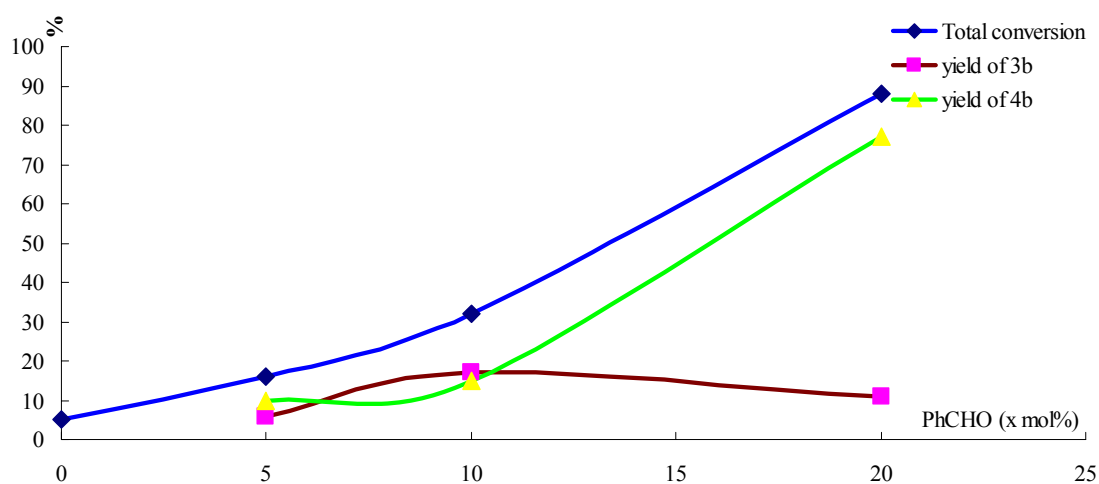

(b)

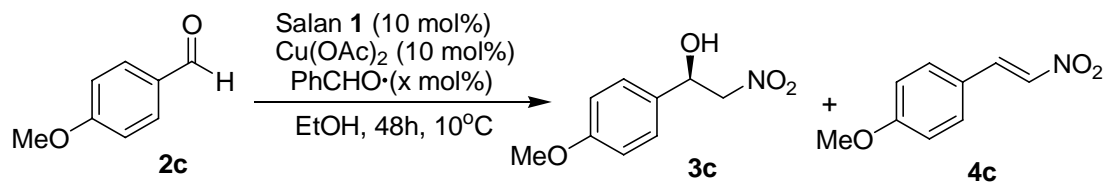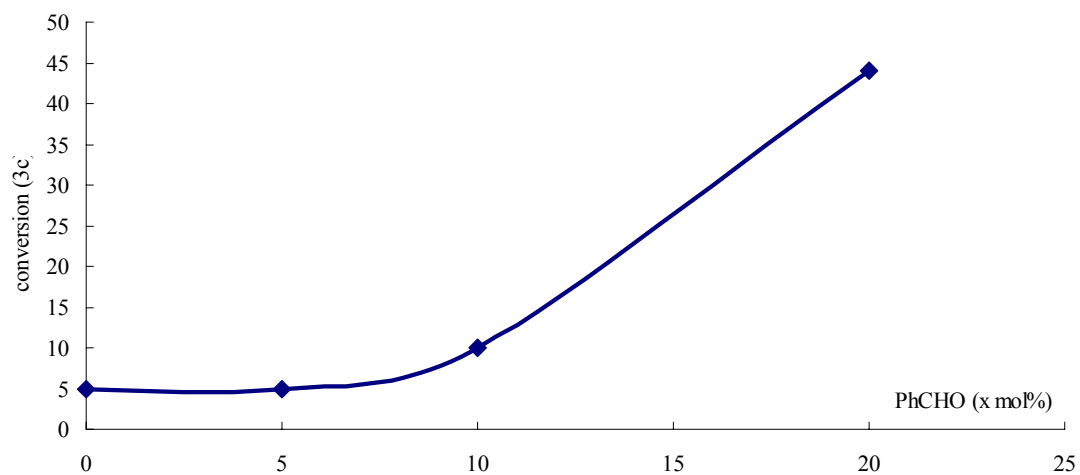

(c)

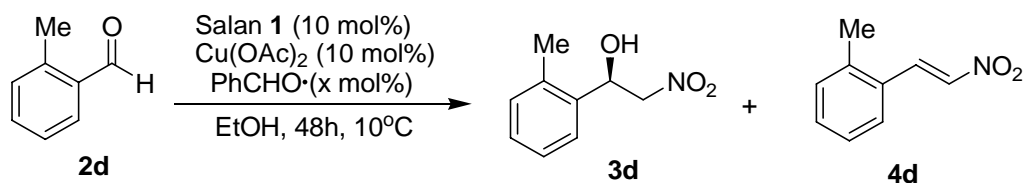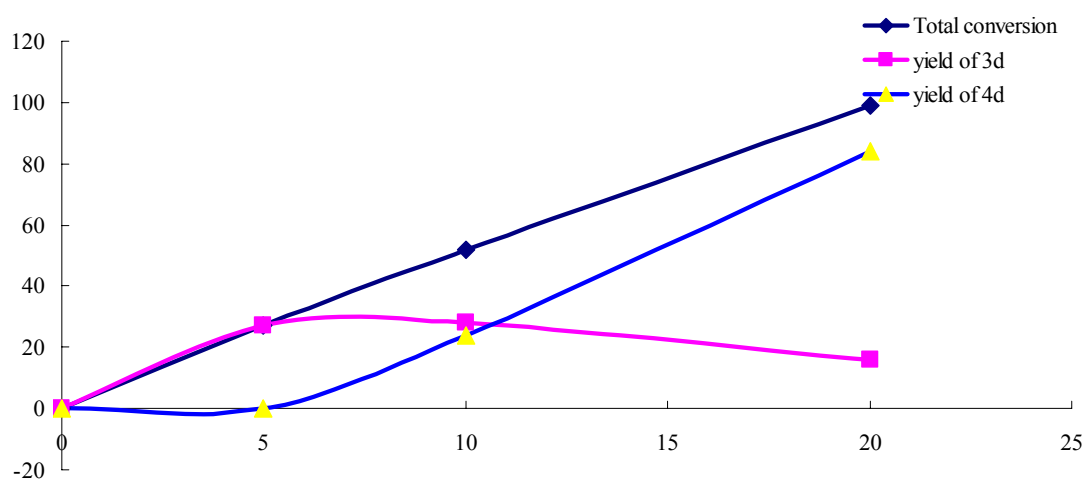

(d)

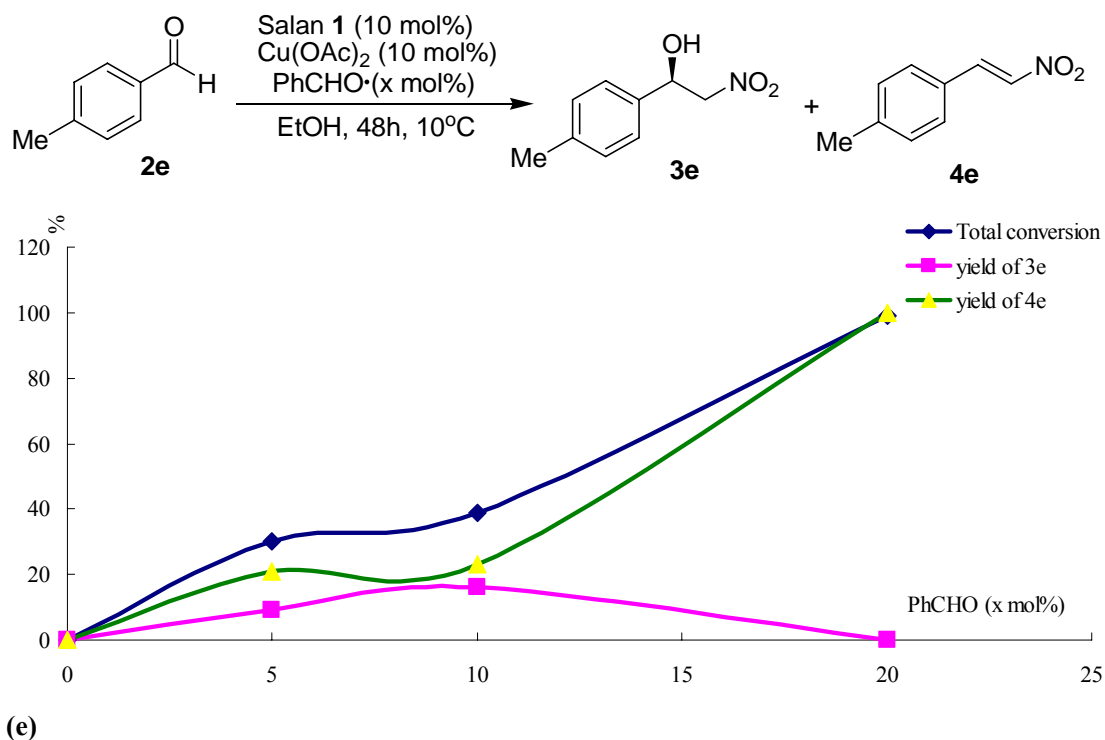

**Figure S2.** The comparison of enantioselectivities and yields in the salen-Co (**1a**) catalyzed Henry reaction of F- or Br-substituted aromatic aldehydes.

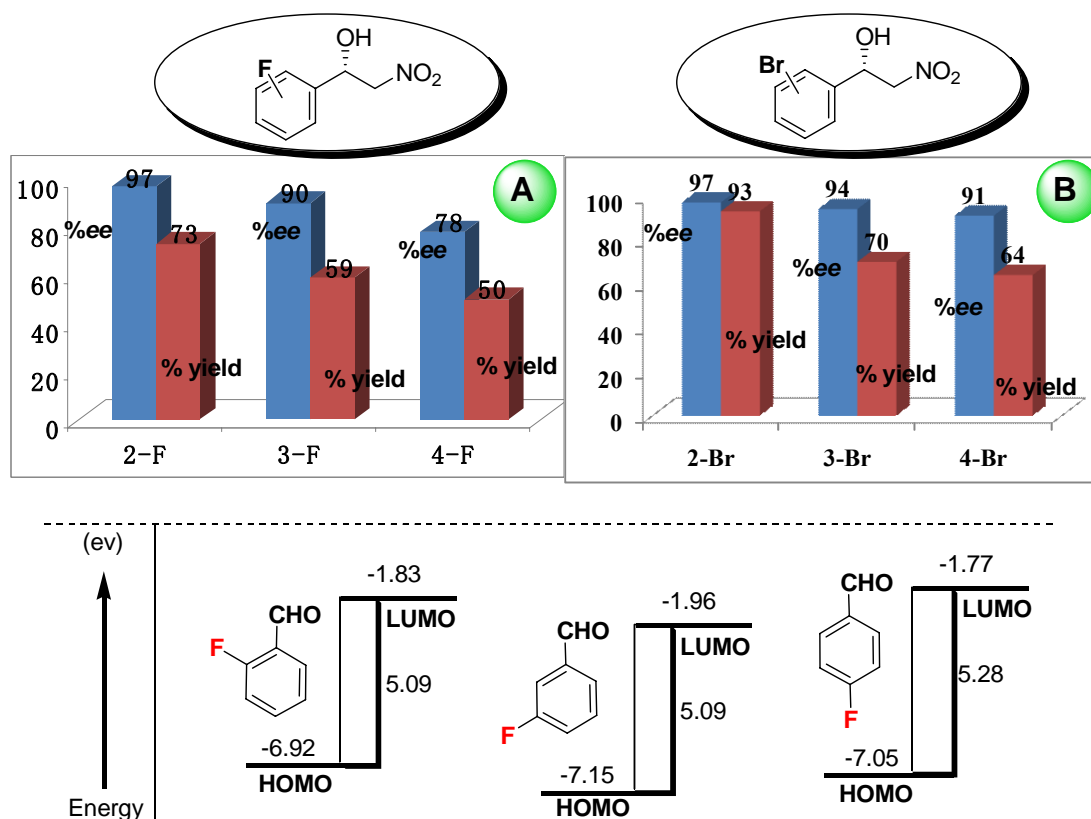

**Figure S3.** Optimized structures of the most reasonable catalyst-substructure complexes (*o*-fluorobenzaldehyde and (*R,R,S,S*)-salen (**5a**)-Co(III) catalyst) based on experimental results.

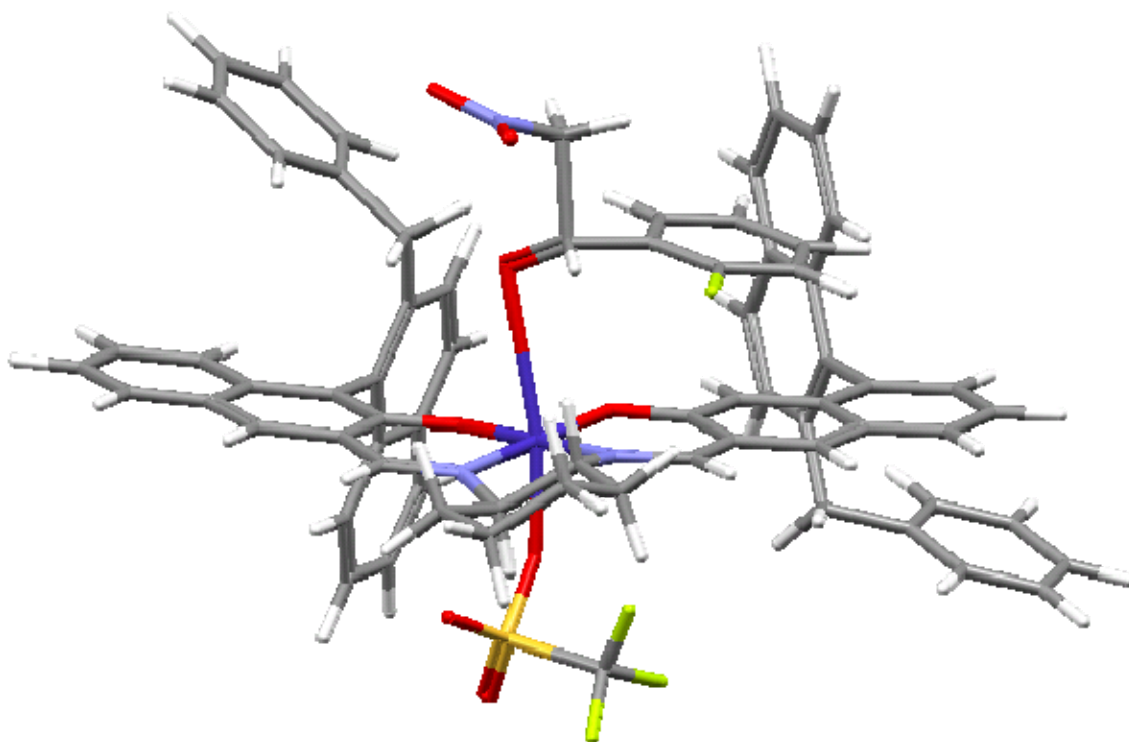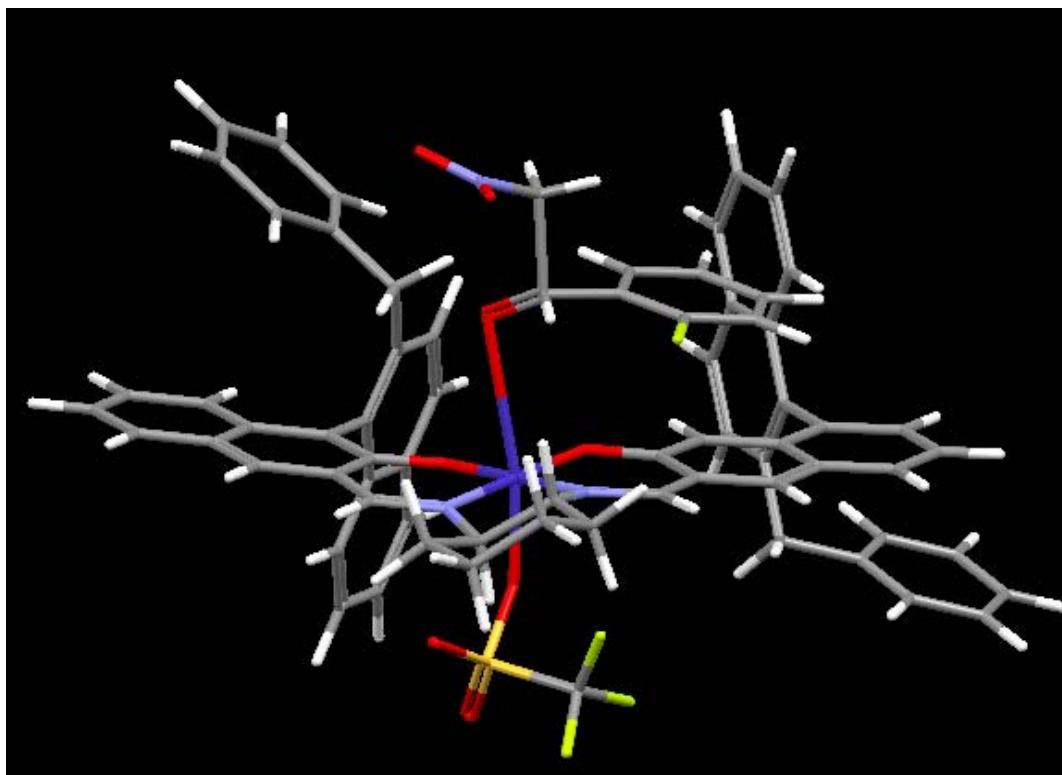



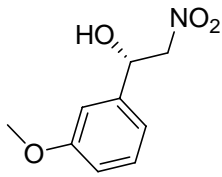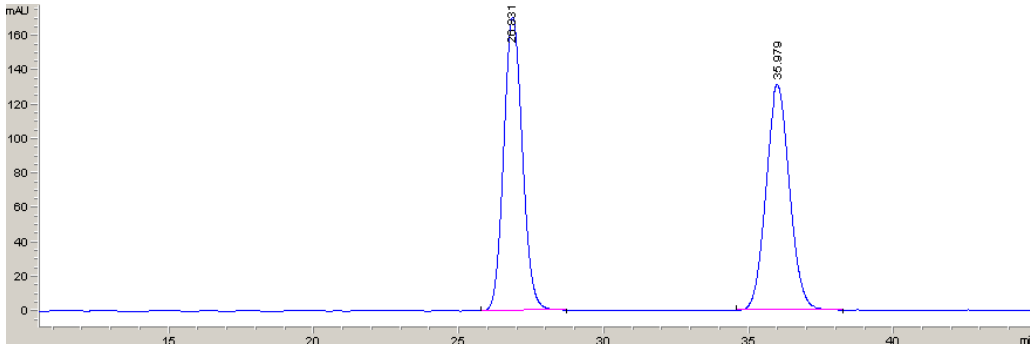

|   | Processed Chanel Descr | RT     | Area   | %Area  | Height |
|---|------------------------|--------|--------|--------|--------|
| 1 | 215                    | 26.831 | 7569.8 | 49.943 | 170.6  |
| 2 | 215                    | 35.979 | 7587   | 50.057 | 131.1  |

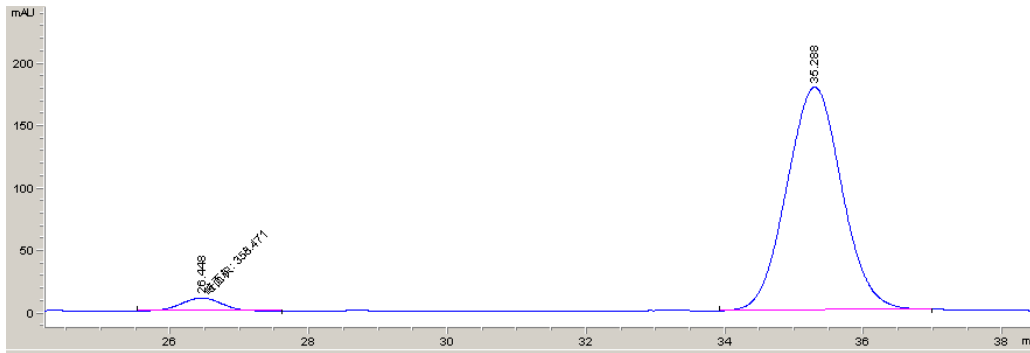

|   | Processed Chanel Descr | RT     | Area   | %Area  | Height |
|---|------------------------|--------|--------|--------|--------|
| 1 | 215                    | 26.448 | 358.5  | 3.518  | 9.6    |
| 2 | 215                    | 35.258 | 9846.8 | 96.487 | 178.5  |

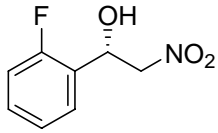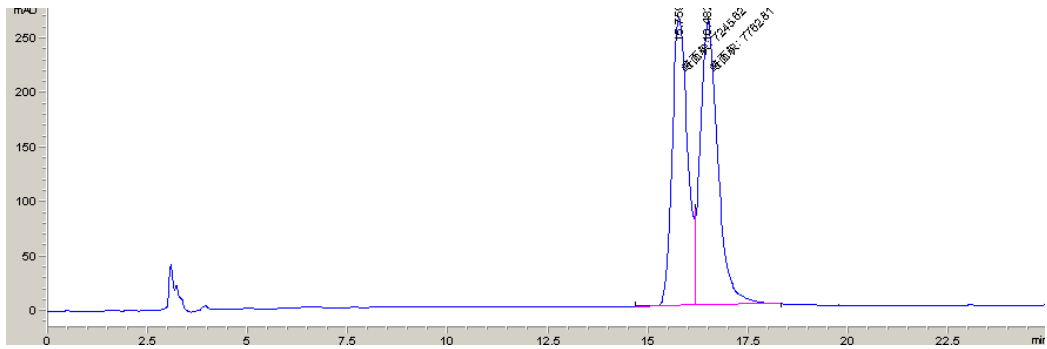

|   | Processed Chanel Descr | RT     | Area   | %Area  | Height |
|---|------------------------|--------|--------|--------|--------|
| 1 | 215                    | 15.759 | 7245.6 | 48.313 | 263.5  |
| 2 | 215                    | 16.482 | 7762.8 | 51.687 | 260.5  |

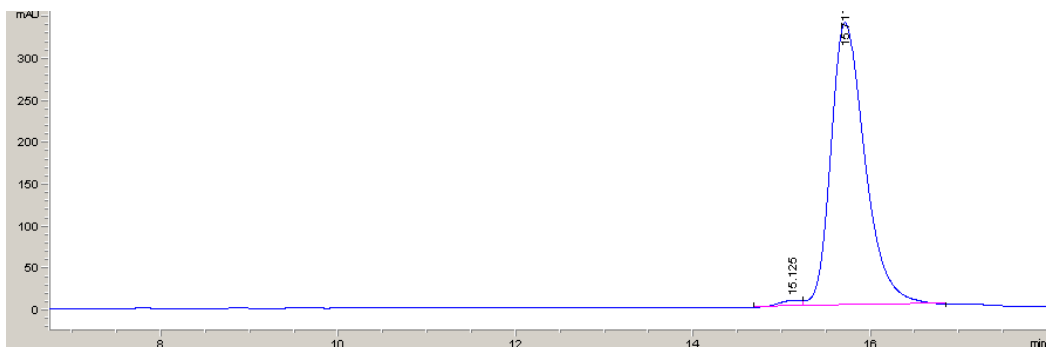

|   | Processed Chanel Descr | RT     | Area   | %Area  | Height |
|---|------------------------|--------|--------|--------|--------|
| 1 | 215                    | 15.125 | 126.7  | 1.385  | 7.2    |
| 2 | 215                    | 15.711 | 9024.3 | 98.615 | 337.4  |





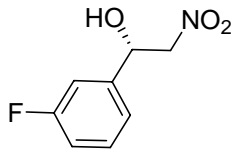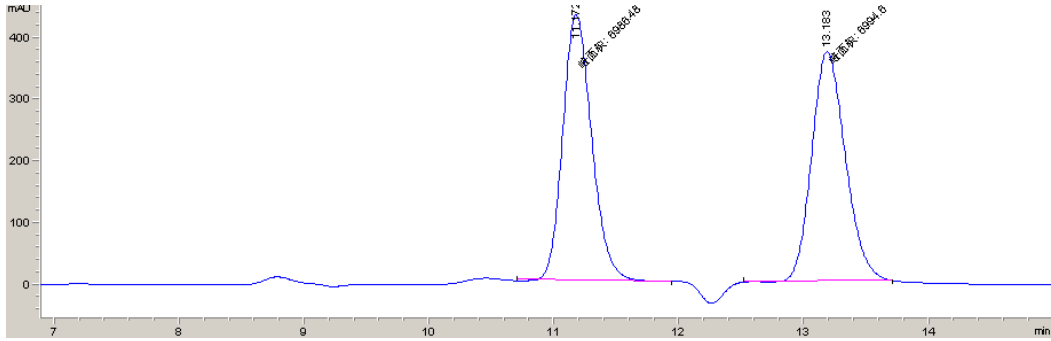

|   | Processed Chanel Descr | RT     | Area   | %Area  | Height |
|---|------------------------|--------|--------|--------|--------|
| 1 | 215                    | 11.172 | 6986.5 | 49.971 | 431.8  |
| 2 | 215                    | 13.183 | 6994.6 | 50.029 | 372.2  |

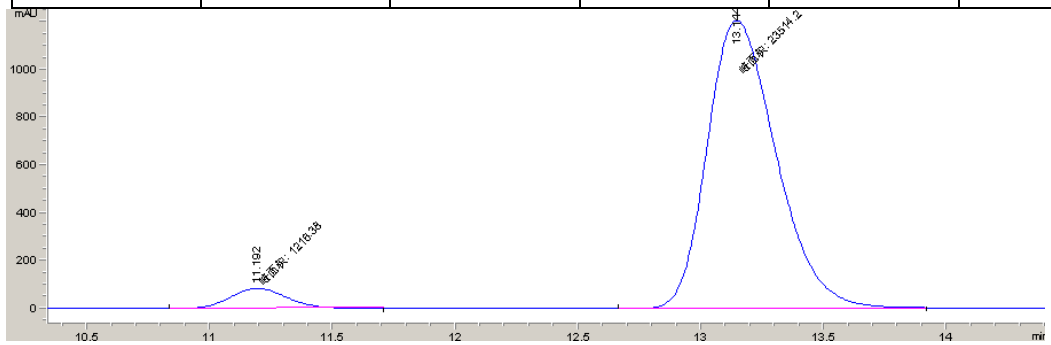

|   | Processed Chanel Descr | RT     | Area    | %Area  | Height |
|---|------------------------|--------|---------|--------|--------|
| 1 | 215                    | 11.192 | 1216.4  | 4.919  | 81     |
| 2 | 215                    | 13.144 | 23154.2 | 95.081 | 1205.1 |

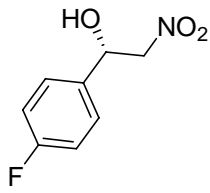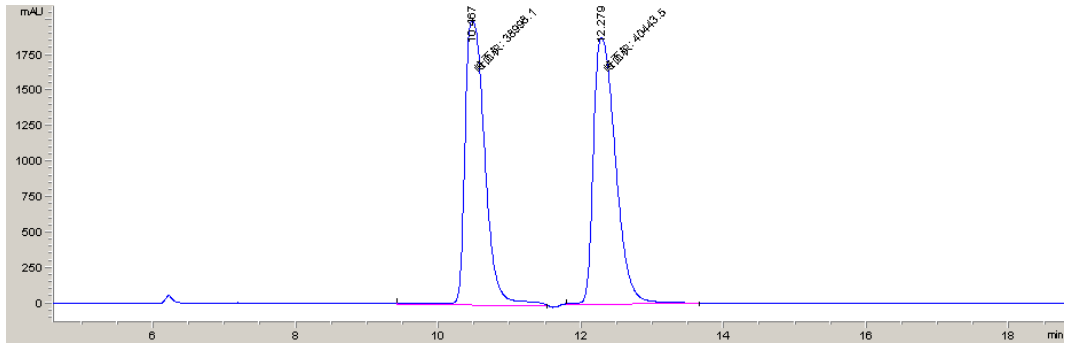

|   | Processed Chanel Descr | RT     | Area    | %Area  | Height |
|---|------------------------|--------|---------|--------|--------|
| 1 | 215                    | 10.467 | 38998.1 | 49.090 | 2010.2 |
| 2 | 215                    | 12.279 | 40443.5 | 50.910 | 1880.1 |

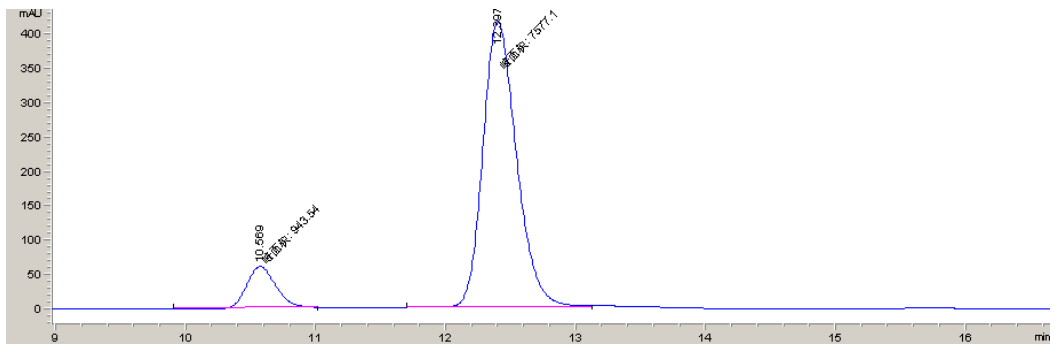

|   | Processed Chanel Descr | RT     | Area   | %Area  | Height |
|---|------------------------|--------|--------|--------|--------|
| 1 | 215                    | 10.569 | 943.5  | 11.074 | 60.8   |
| 2 | 215                    | 12.397 | 7577.1 | 88.926 | 416.5  |

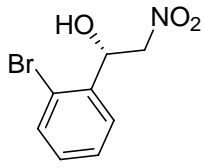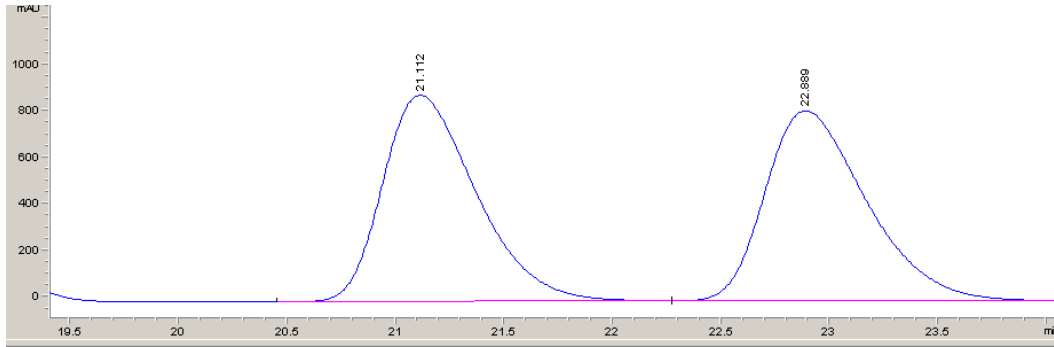

|   | Processed Chanel Descr | RT     | Area    | %Area  | Height |
|---|------------------------|--------|---------|--------|--------|
| 1 | 215                    | 21.112 | 26655.5 | 50.075 | 887.6  |
| 2 | 215                    | 22.889 | 26576.2 | 49.925 | 817.7  |

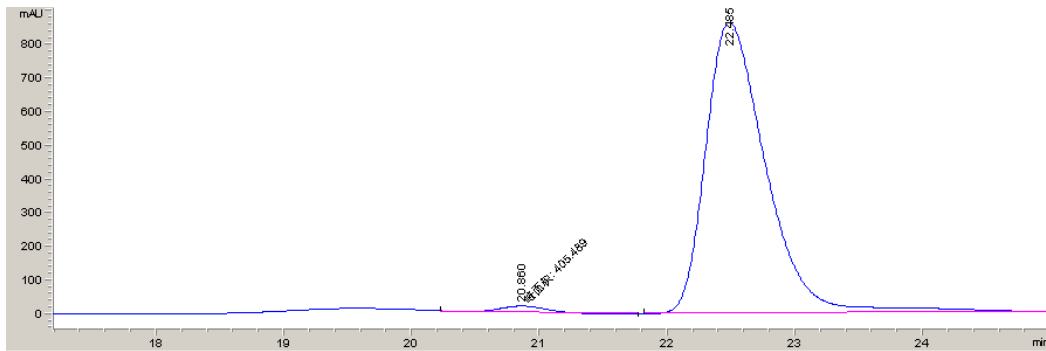

|   | Processed Chanel Descr | RT     | Area    | %Area  | Height |
|---|------------------------|--------|---------|--------|--------|
| 1 | 215                    | 20.86  | 405.5   | 1.401  | 17.5   |
| 2 | 215                    | 22.485 | 28533.6 | 98.599 | 865    |

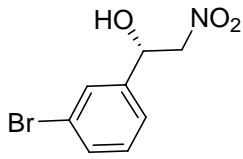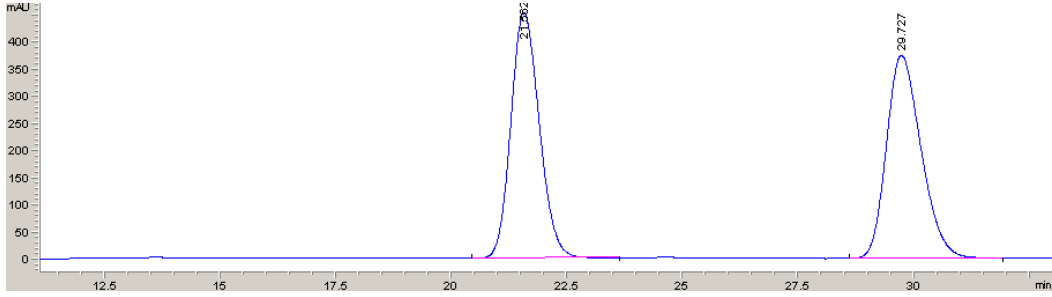

|   | Processed Chanel Descr | RT     | Area    | %Area  | Height |
|---|------------------------|--------|---------|--------|--------|
| 1 | 215                    | 21.562 | 19435.9 | 49.923 | 453.4  |
| 2 | 215                    | 29.727 | 19495.8 | 50.077 | 374.6  |

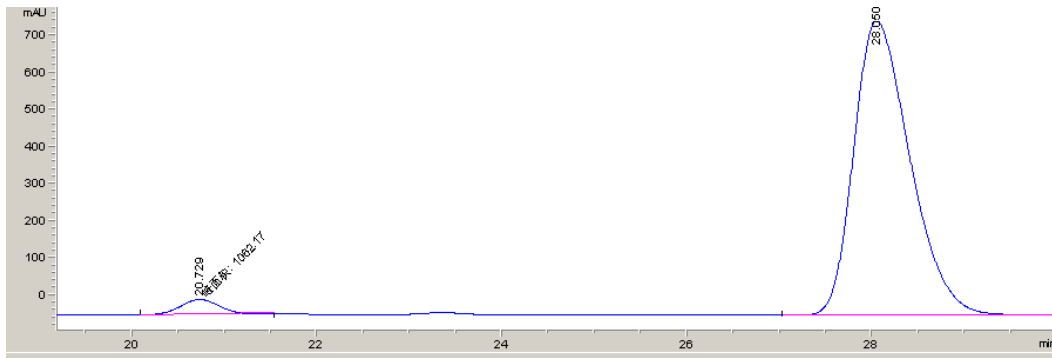

|   | Processed Chanel Descr | RT     | Area    | %Area  | Height |
|---|------------------------|--------|---------|--------|--------|
| 1 | 215                    | 20.729 | 1062.2  | 3.076  | 38.4   |
| 2 | 215                    | 28.05  | 33471.1 | 96.924 | 792.7  |

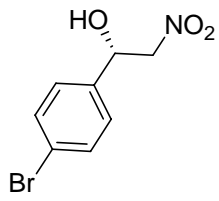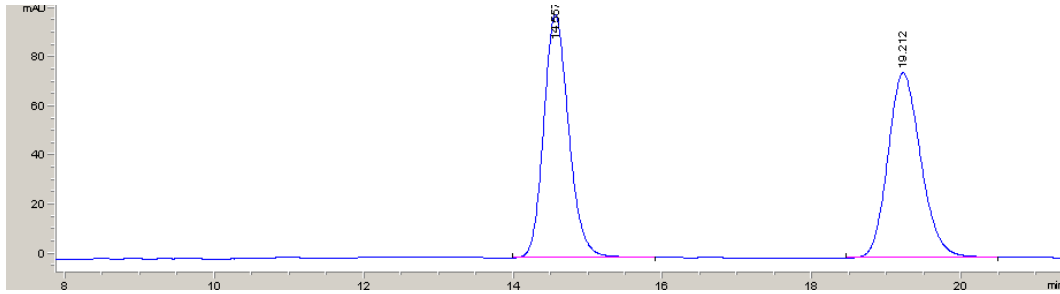

|   | Processed Chanel Descr | RT     | Area   | %Area  | Height |
|---|------------------------|--------|--------|--------|--------|
| 1 | 215                    | 14.557 | 2306.7 | 50.054 | 99.2   |
| 2 | 215                    | 19.212 | 2301.7 | 49.946 | 75.3   |

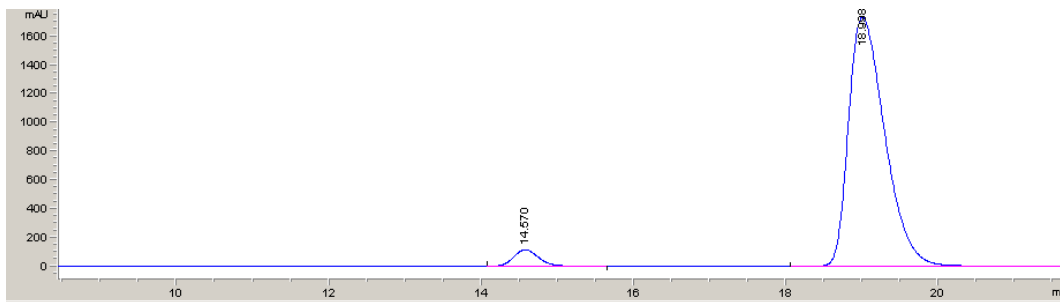

|   | Processed Chanel Descr | RT     | Area    | %Area  | Height |
|---|------------------------|--------|---------|--------|--------|
| 1 | 215                    | 14.57  | 2652.9  | 4.423  | 115.9  |
| 2 | 215                    | 18.998 | 57328.5 | 95.577 | 1732.3 |

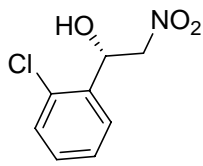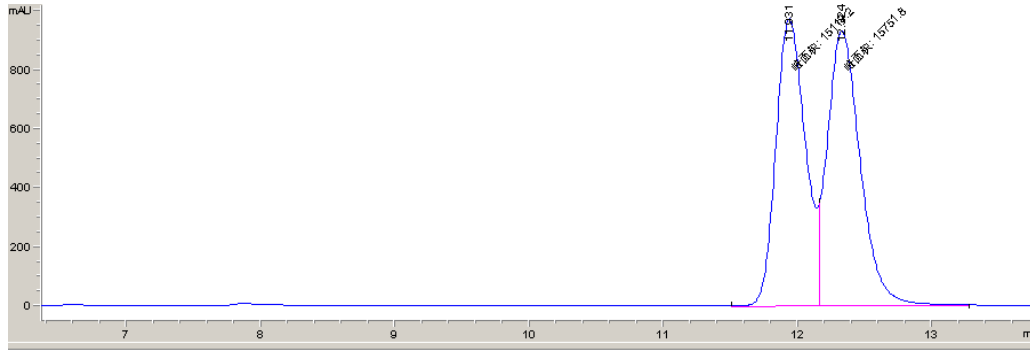

|   | Processed Chanel Descr | RT     | Area    | %Area  | Height |
|---|------------------------|--------|---------|--------|--------|
| 1 | 215                    | 11.931 | 15119.2 | 48.975 | 974.8  |
| 2 | 215                    | 12.424 | 15751.8 | 51.025 | 933.4  |

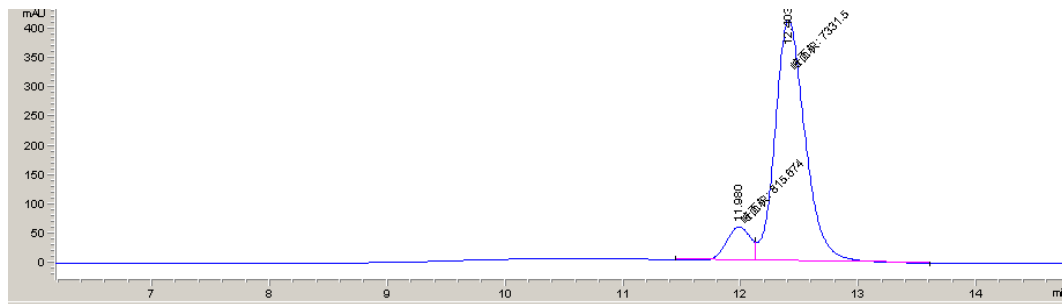

|   | Processed Chanel Descr | RT     | Area   | %Area  | Height |
|---|------------------------|--------|--------|--------|--------|
| 1 | 215                    | 11.98  | 815.7  | 10.012 | 57.6   |
| 2 | 215                    | 12.403 | 7331.5 | 89.988 | 412.6  |

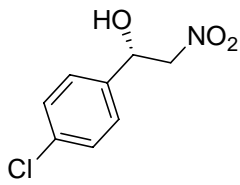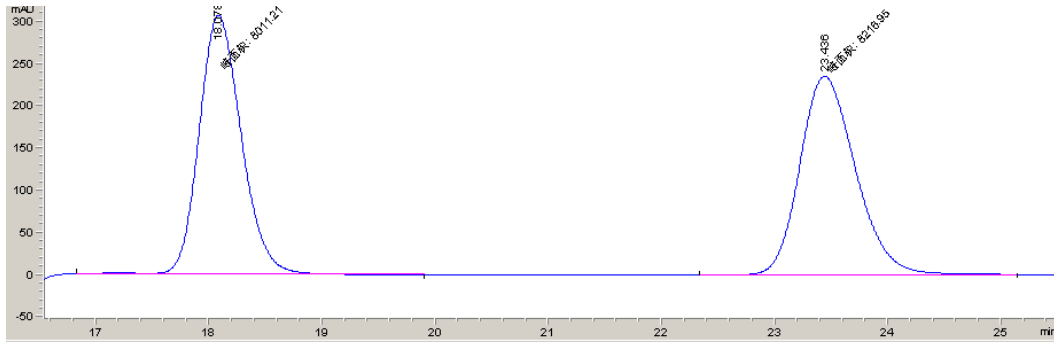

|   | Processed Chanel Descr | RT     | Area   | %Area  | Height |
|---|------------------------|--------|--------|--------|--------|
| 1 | 215                    | 18.078 | 8011.2 | 49.366 | 307.4  |
| 2 | 215                    | 23.466 | 8216.9 | 50.634 | 236.3  |

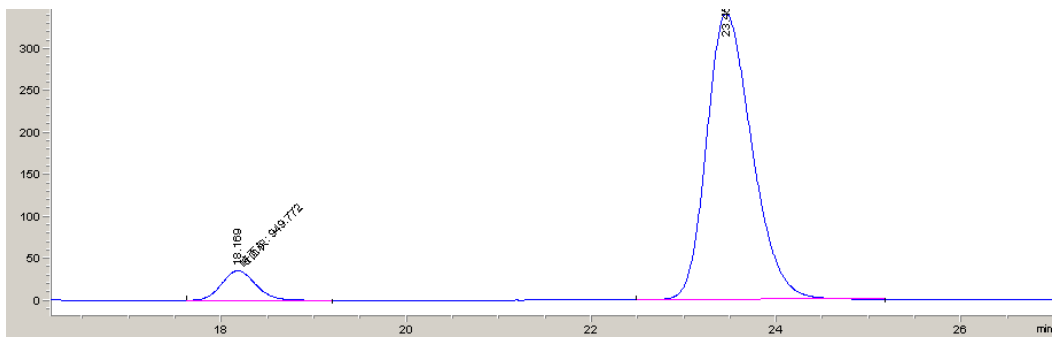

|   | Processed Chanel Descr | RT     | Area  | %Area  | Height |
|---|------------------------|--------|-------|--------|--------|
| 1 | 215                    | 18.169 | 949.8 | 7.524  | 35.7   |
| 2 | 215                    | 23.453 | 11674 | 92.476 | 341.2  |

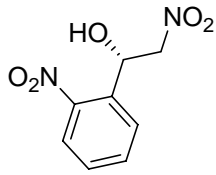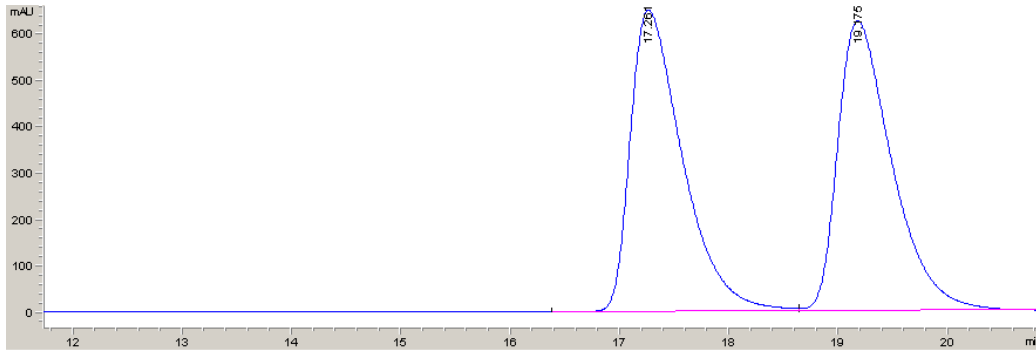

|   | Processed Chanel Descr | RT     | Area    | %Area | Height |
|---|------------------------|--------|---------|-------|--------|
| 1 | 215                    | 17.261 | 21638.2 | 50.07 | 651.3  |
| 2 | 215                    | 19.117 | 21577.7 | 49.97 | 625.6  |

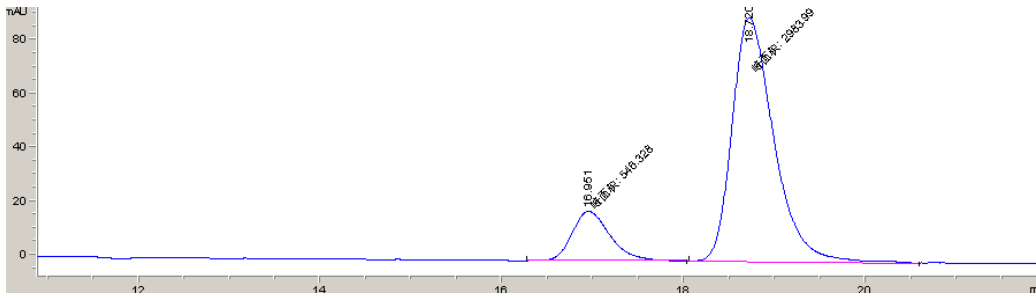

|   | Processed Chanel Descr | RT     | Area  | %Area  | Height |
|---|------------------------|--------|-------|--------|--------|
| 1 | 215                    | 16.951 | 546.3 | 15.475 | 18.5   |
| 2 | 215                    | 18.72  | 2984  | 84.525 | 91.7   |



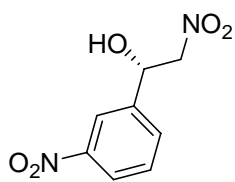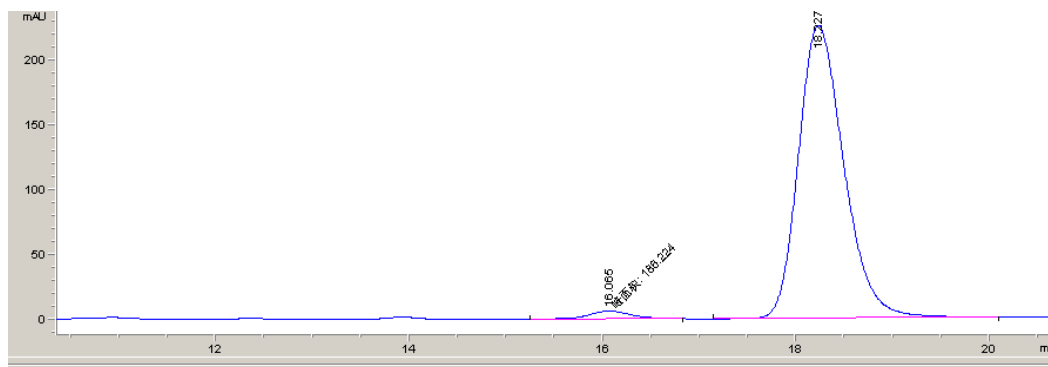

|   | Processed Chanel Descr | RT     | Area   | %Area  | Height |
|---|------------------------|--------|--------|--------|--------|
| 1 | 215                    | 16.065 | 186.2  | 2.453  | 6      |
| 2 | 215                    | 18.227 | 7406.4 | 97.547 | 226.4  |

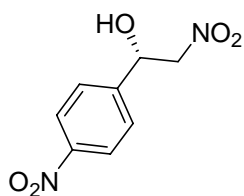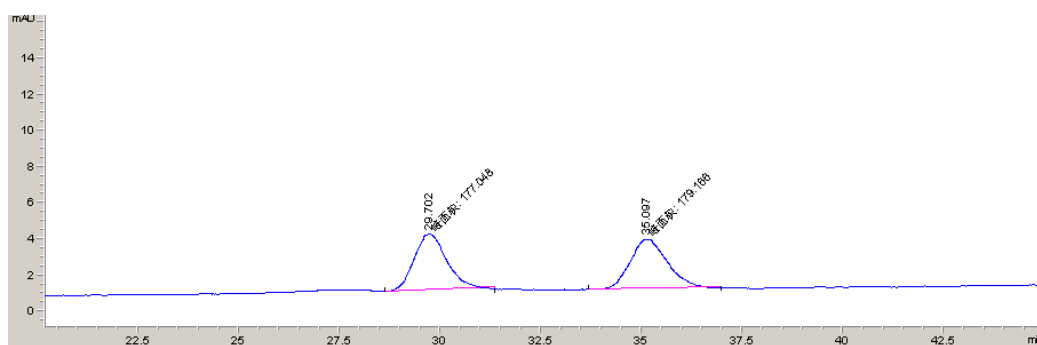

|   | Processed Chanel Descr | RT     | Area  | %Area  | Height |
|---|------------------------|--------|-------|--------|--------|
| 1 | 215                    | 29.702 | 177   | 49.703 | 3.1    |
| 2 | 215                    | 35.097 | 179.2 | 50.297 | 2.8    |

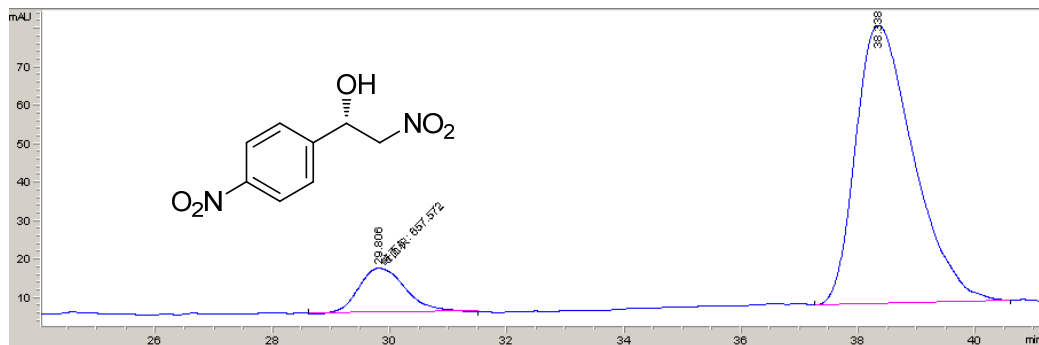

|   | Processed Chanel Descr | RT     | Area   | %Area  | Height |
|---|------------------------|--------|--------|--------|--------|
| 1 | 215                    | 29.806 | 657.6  | 11.644 | 11.7   |
| 2 | 215                    | 38.338 | 4989.8 | 88.356 | 72.4   |

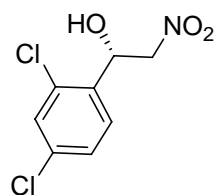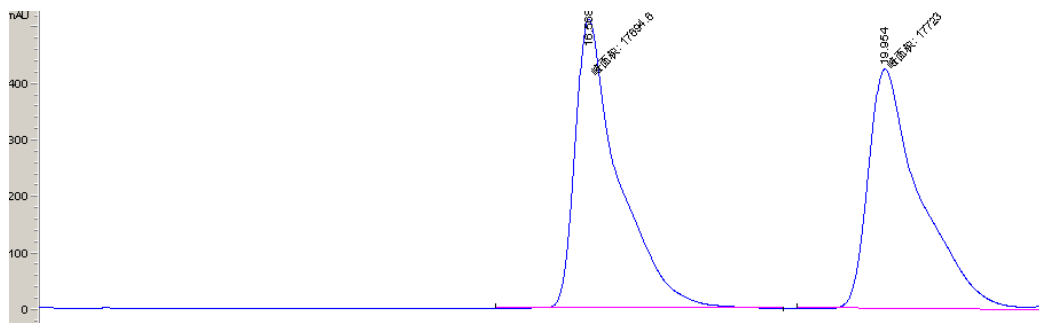

|   | Processed Chanel Descr | RT     | Area    | %Area  | Height |
|---|------------------------|--------|---------|--------|--------|
| 1 | 215                    | 16.568 | 17694.6 | 49.960 | 511.7  |
| 2 | 215                    | 19.954 | 17723   | 50.040 | 424.7  |

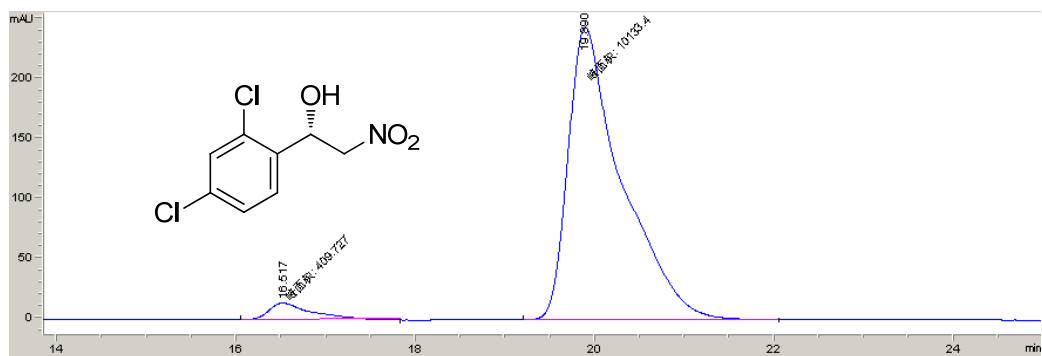

|   | Processed Chanel Descr | RT     | Area    | %Area  | Height |
|---|------------------------|--------|---------|--------|--------|
| 1 | 215                    | 16.517 | 409.7   | 3.886  | 13.4   |
| 2 | 215                    | 19.89  | 10133.4 | 96.114 | 243.6  |

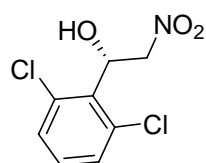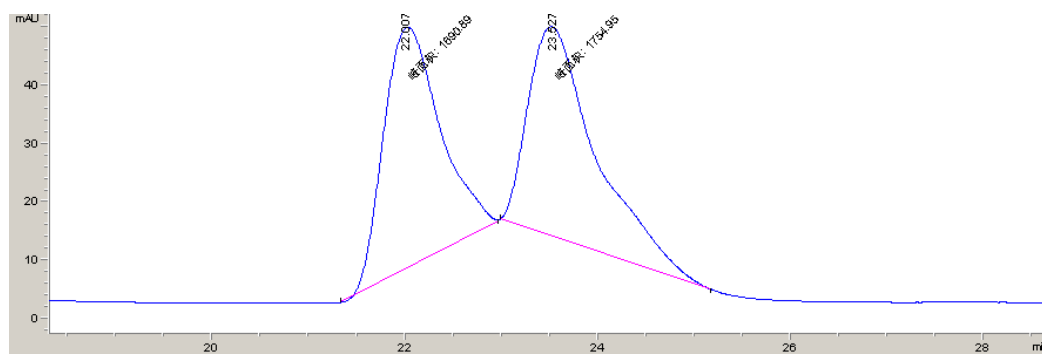

|   | Processed Chanel Descr | RT     | Area   | %Area | Height |
|---|------------------------|--------|--------|-------|--------|
| 1 | 215                    | 22.007 | 1690.9 | 49.07 | 41.3   |
| 2 | 215                    | 23.527 | 1754.9 | 50.93 | 35.8   |

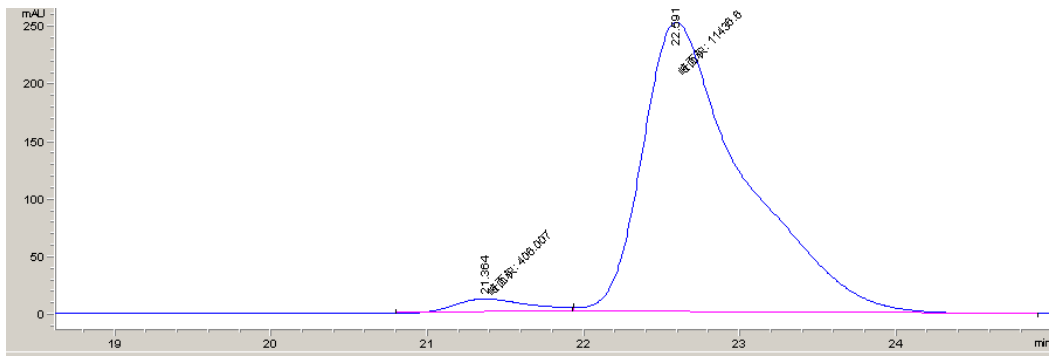

|   | Processed Chanel Descr | RT     | Area    | %Area  | Height |
|---|------------------------|--------|---------|--------|--------|
| 1 | 215                    | 21.364 | 406     | 3.428  | 12     |
| 2 | 215                    | 22.591 | 11436.6 | 96.573 | 252.1  |

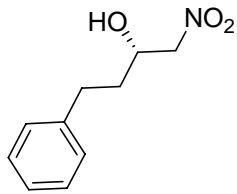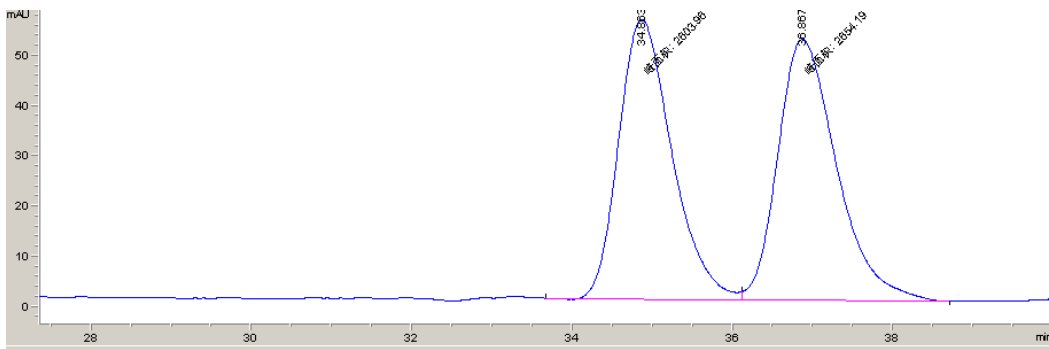

|   | Processed Chanel Descr | RT     | Area   | %Area  | Height |
|---|------------------------|--------|--------|--------|--------|
| 1 | 215                    | 34.863 | 2604   | 49.522 | 55.9   |
| 2 | 215                    | 36.867 | 2654.2 | 50.478 | 52     |

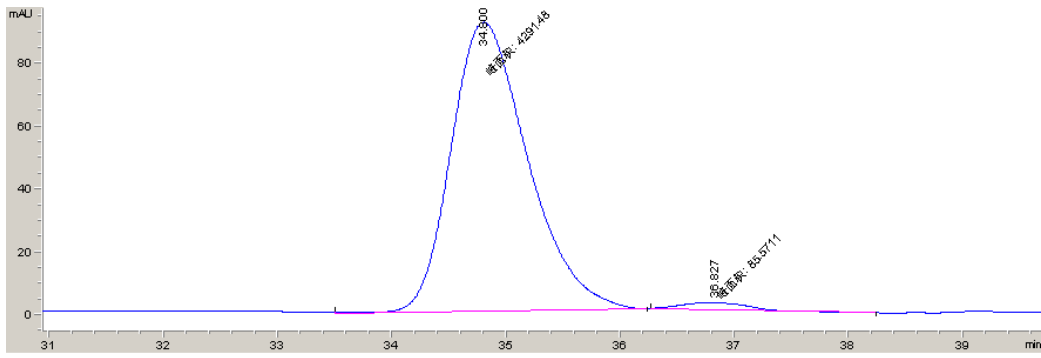

|   | Processed Chanel Descr | RT     | Area   | %Area  | Height |
|---|------------------------|--------|--------|--------|--------|
| 1 | 215                    | 34.8   | 4291.5 | 98.045 | 91.9   |
| 2 | 215                    | 36.827 | 85.6   | 1.955  | 2.2    |

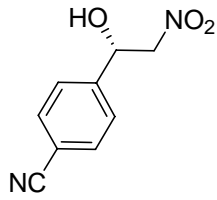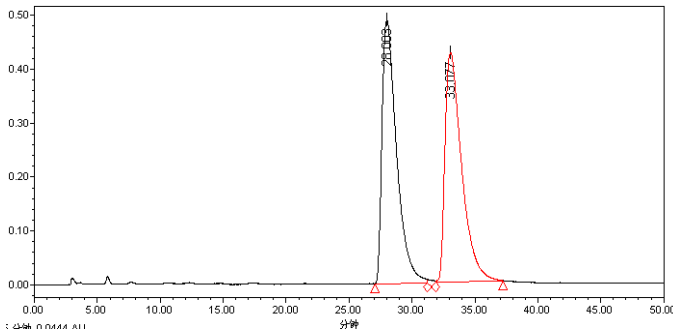

|   | Processed Chanel Descr | RT     | Area     | %Area | Height |
|---|------------------------|--------|----------|-------|--------|
| 1 | 215                    | 28.003 | 39400329 | 50.12 | 489748 |
| 2 | 215                    | 33.077 | 39204788 | 49.88 |        |

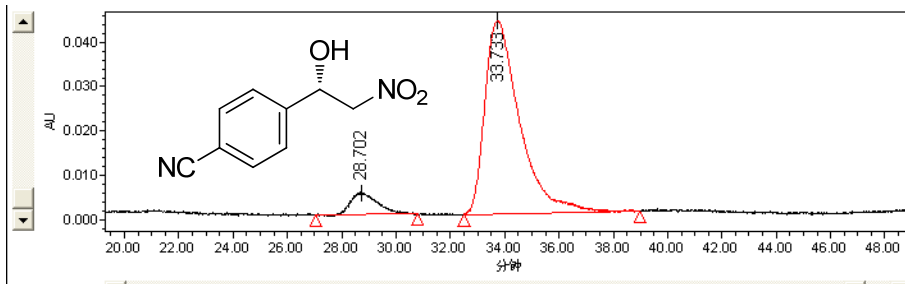

|   | Processed Chanel Descr | RT     | Area    | %Area | Height |
|---|------------------------|--------|---------|-------|--------|
| 1 | 215                    | 28.702 | 345184  | 8.21  | 49.48  |
| 2 | 215                    | 33.733 | 3860669 | 91.79 | 43435  |

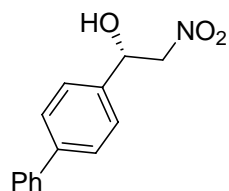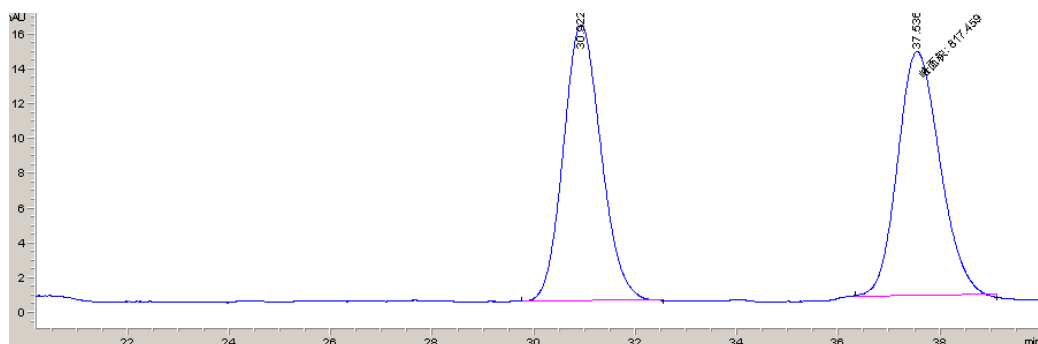

|   | Processed Chanel Descr | RT     | Area  | %Area  | Height |
|---|------------------------|--------|-------|--------|--------|
| 1 | 215                    | 30.922 | 822.4 | 50.151 | 15.9   |
| 2 | 215                    | 37.536 | 87.5  | 49.849 | 14.1   |

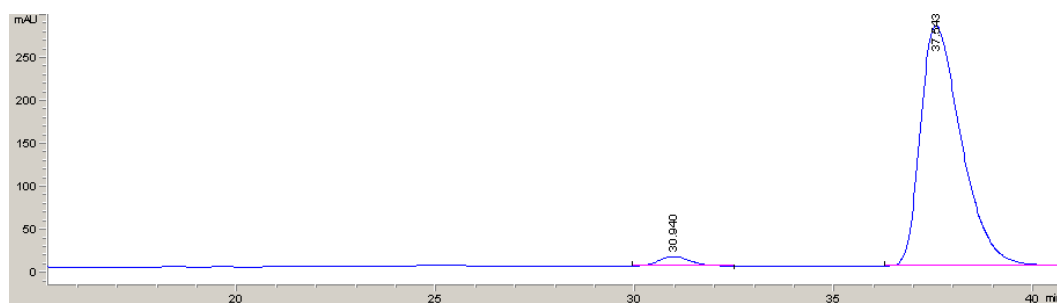

|   | Processed Chanel Descr | RT     | Area    | %Area  | Height |
|---|------------------------|--------|---------|--------|--------|
| 1 | 215                    | 30.94  | 600.8   | 2.938  | 11     |
| 2 | 215                    | 37.543 | 19846.4 | 97.062 | 279    |

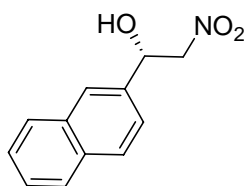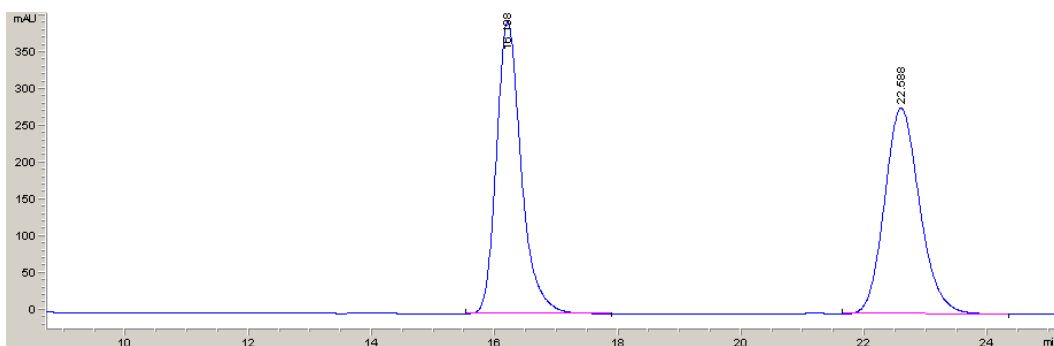

|   | Processed Chanel Descr | RT     | Area    | %Area  | Height |
|---|------------------------|--------|---------|--------|--------|
| 1 | 215                    | 16.198 | 11083.3 | 49.977 | 396.9  |
| 2 | 215                    | 22.588 | 11093.7 | 50.023 | 279.6  |

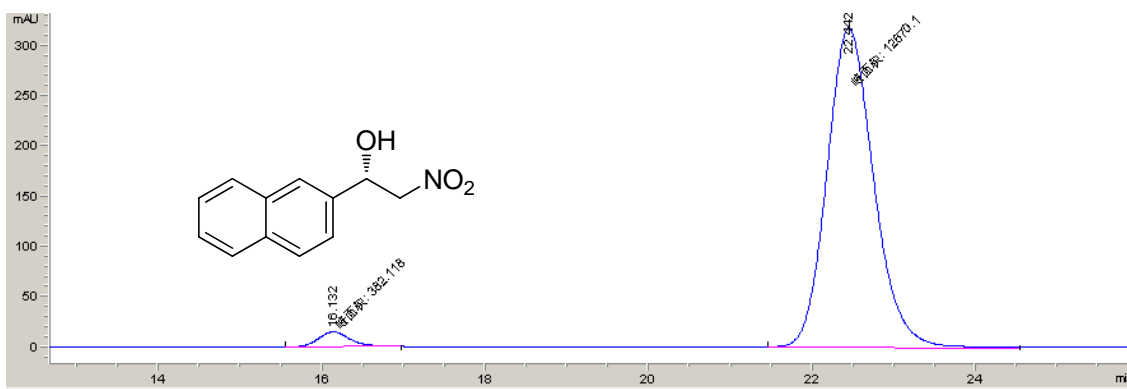

|   | Processed Chanel Descr | RT     | Area    | %Area  | Height |
|---|------------------------|--------|---------|--------|--------|
| 1 | 215                    | 16.132 | 382.1   | 2.938  | 14.5   |
| 2 | 215                    | 22.332 | 12670.1 | 97.072 | 317.9  |

## 6. NMR Charts of salen and salan ligands and Compounds

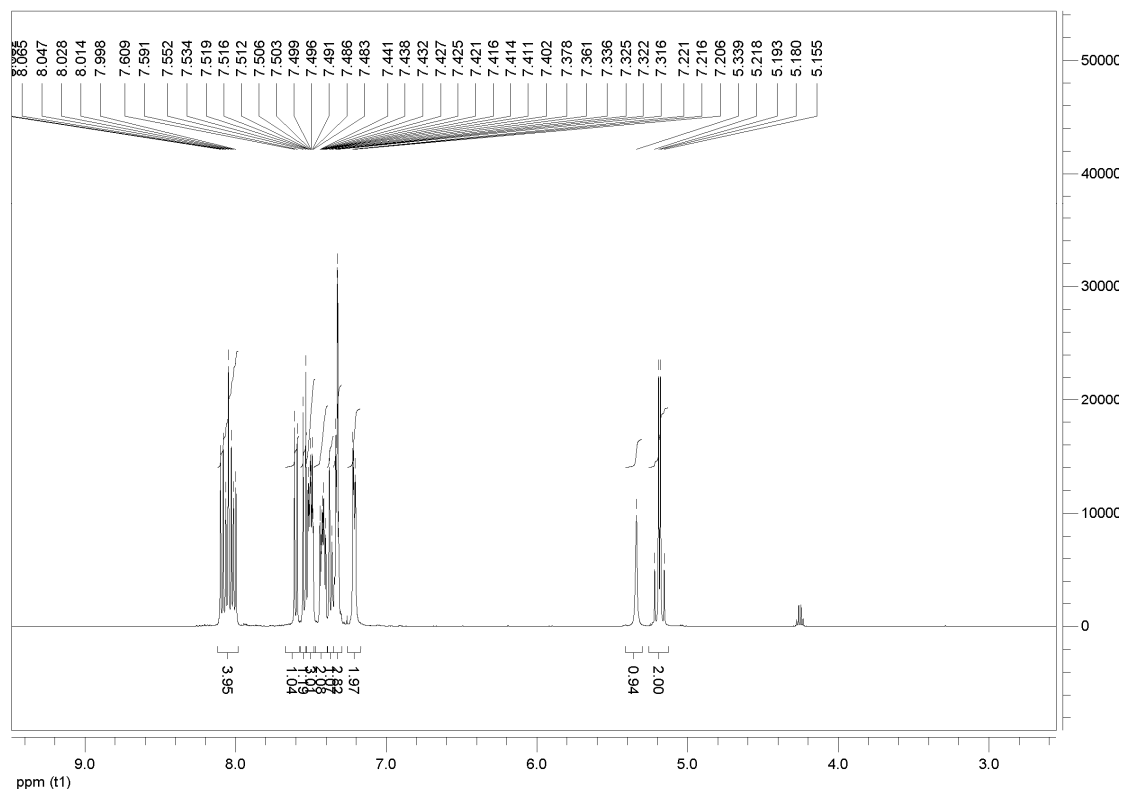

ppm (t1)

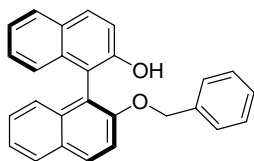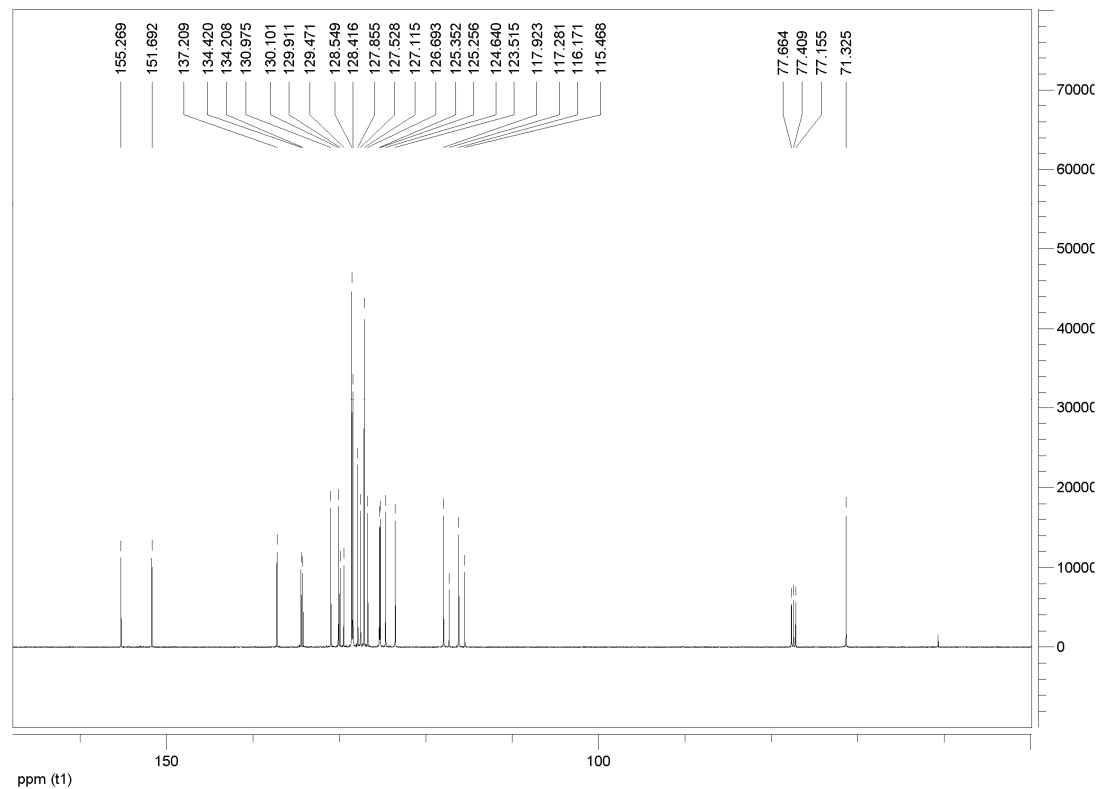

ppm (t1)



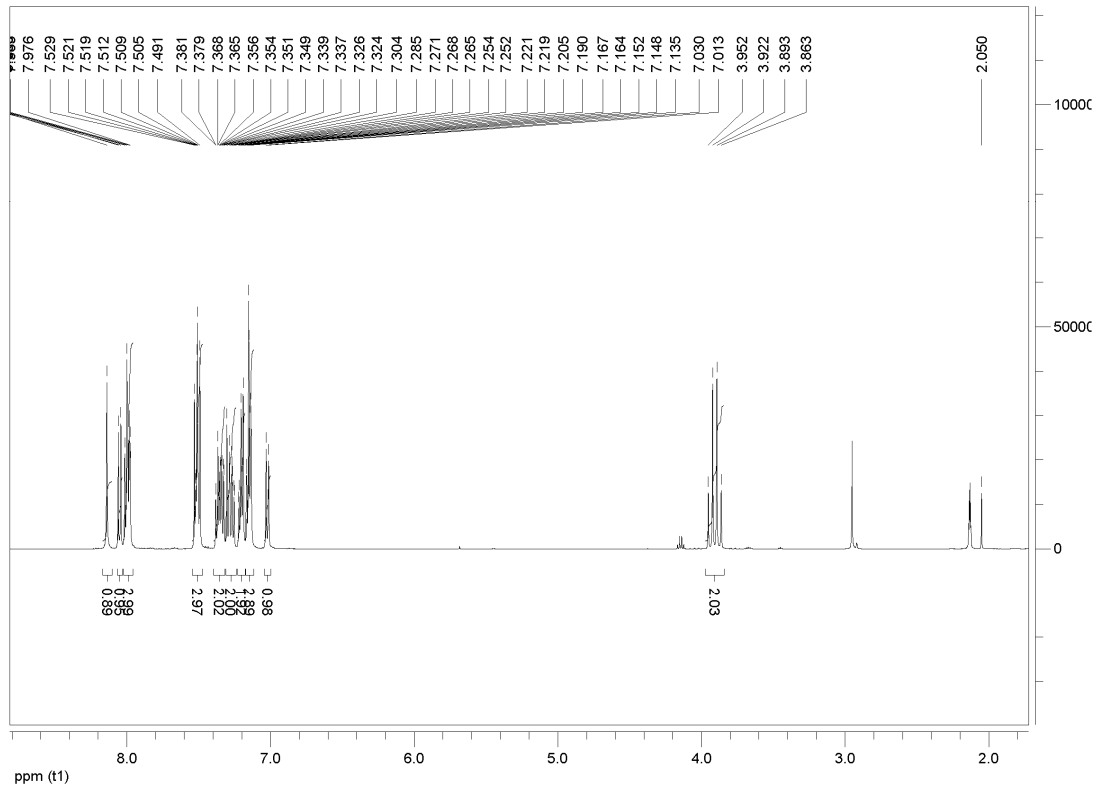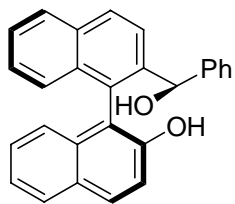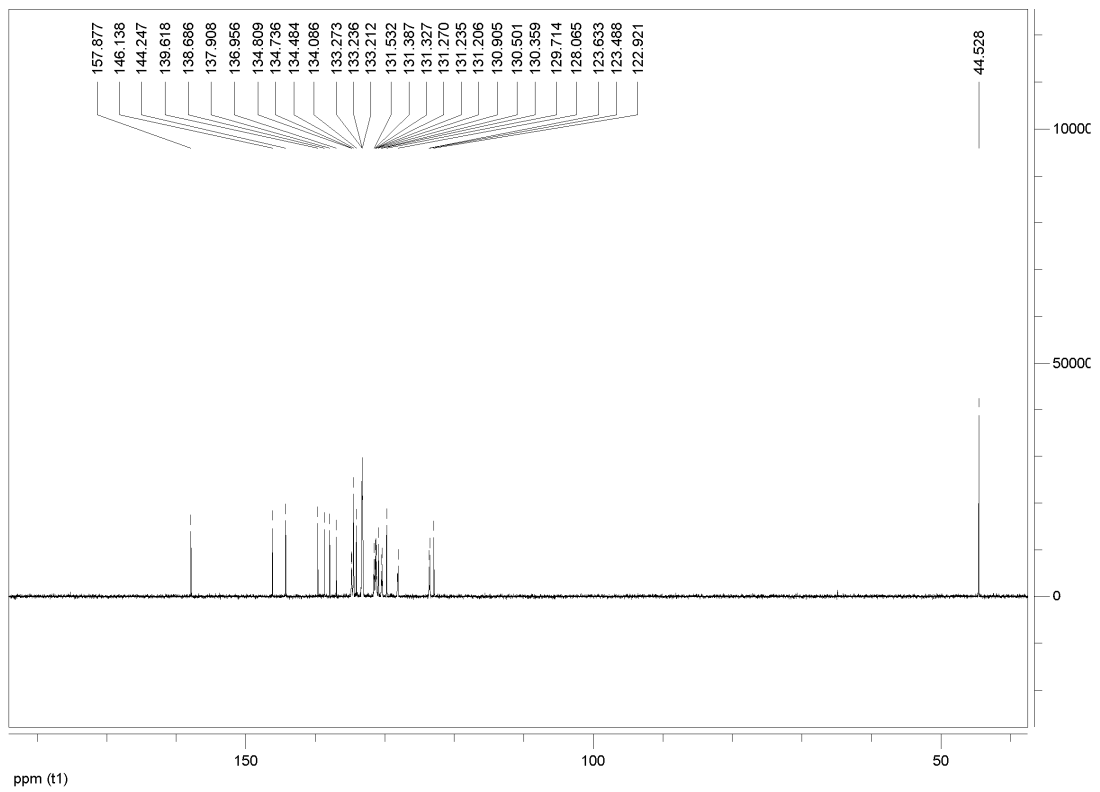

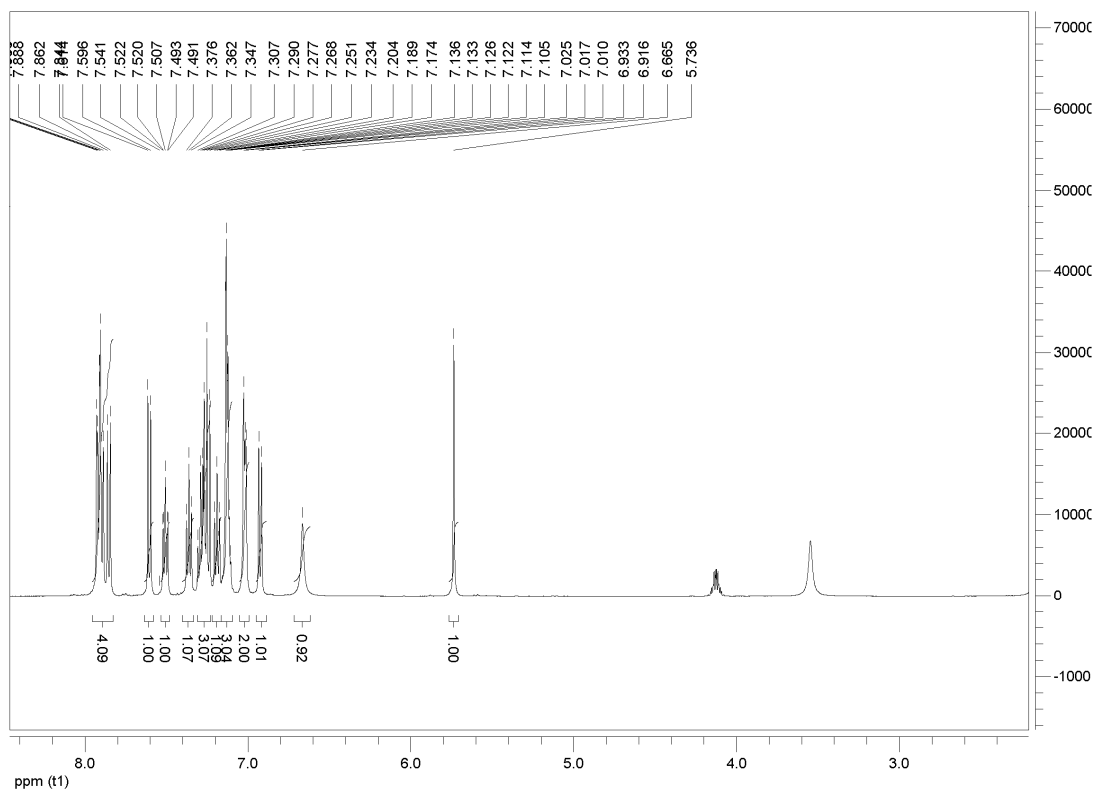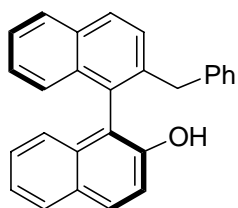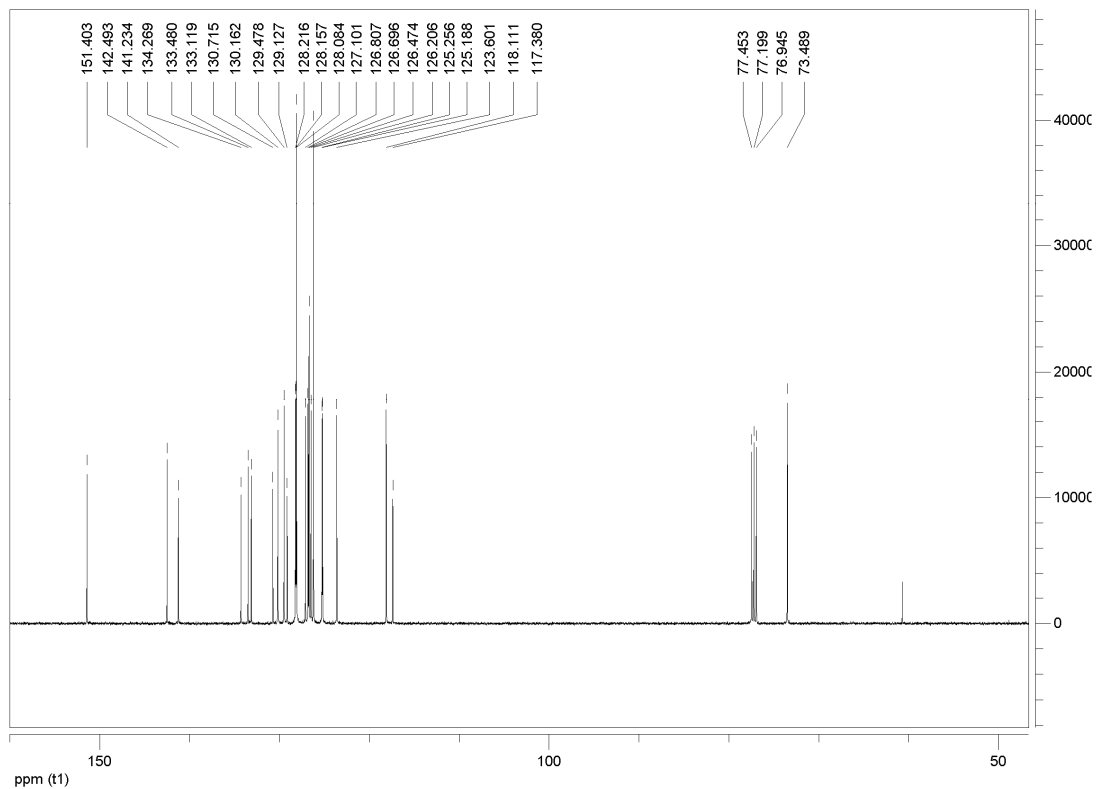

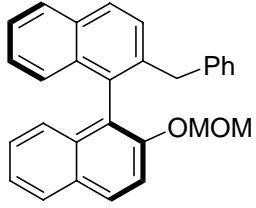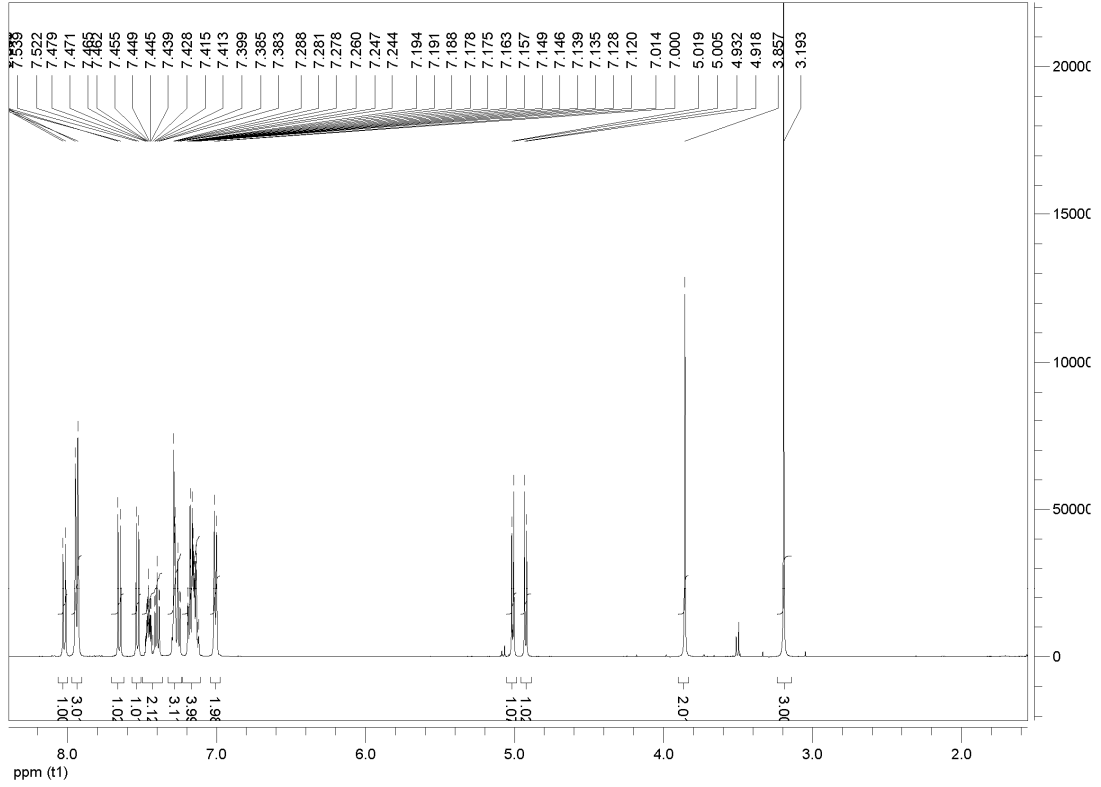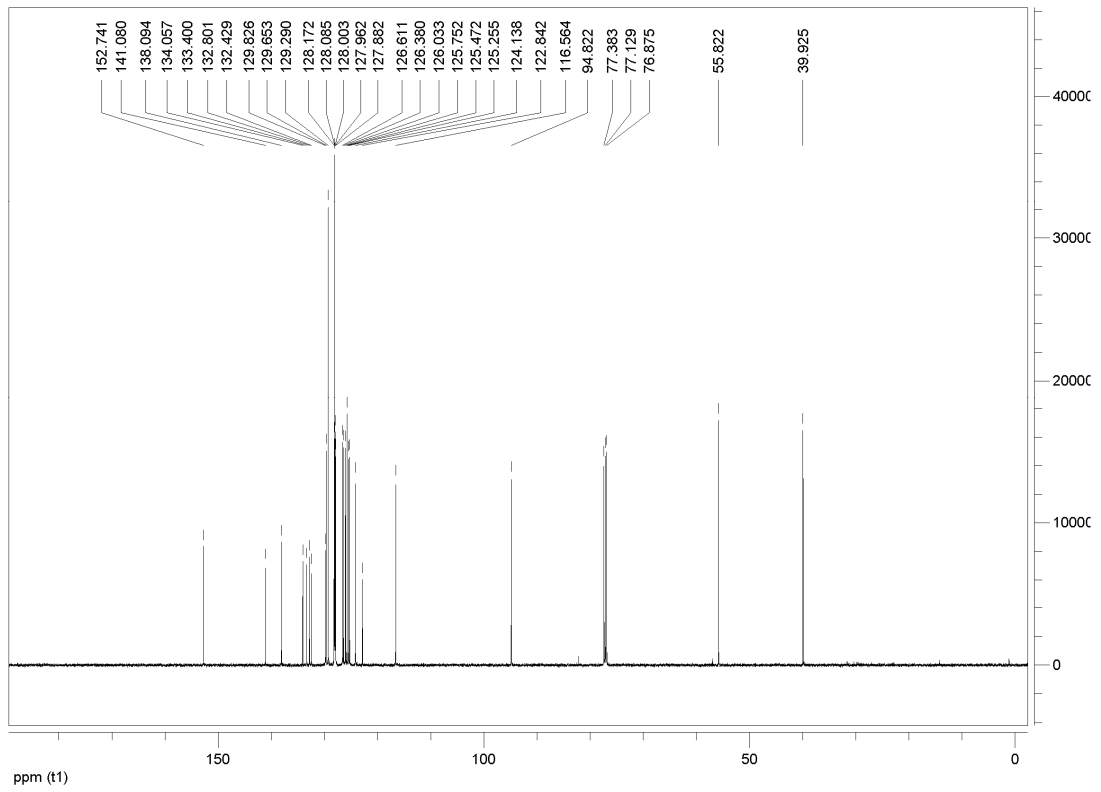

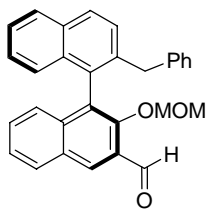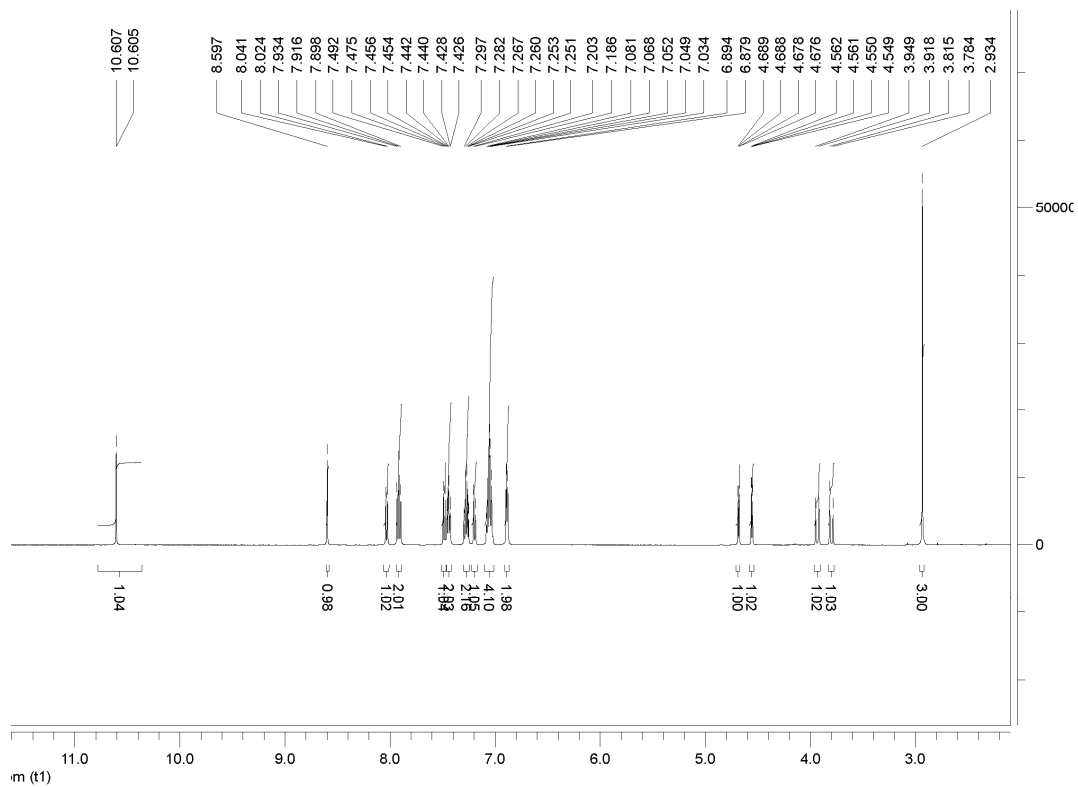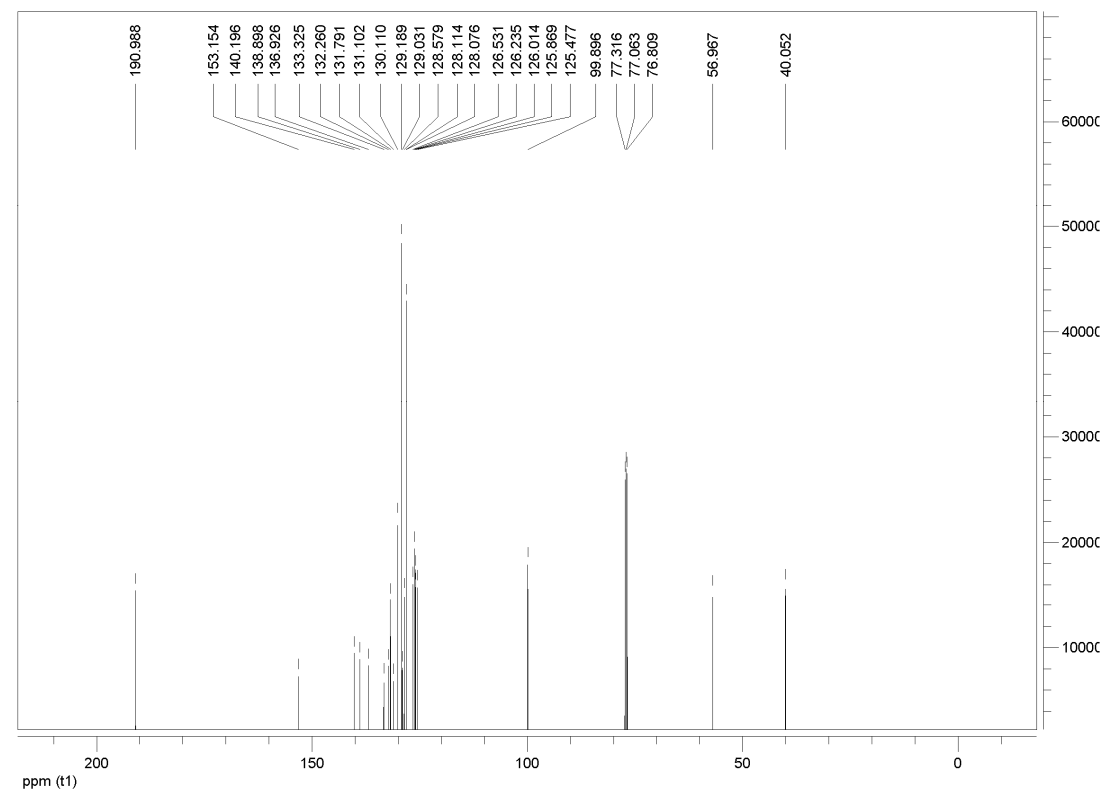

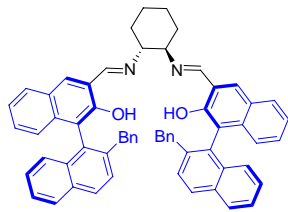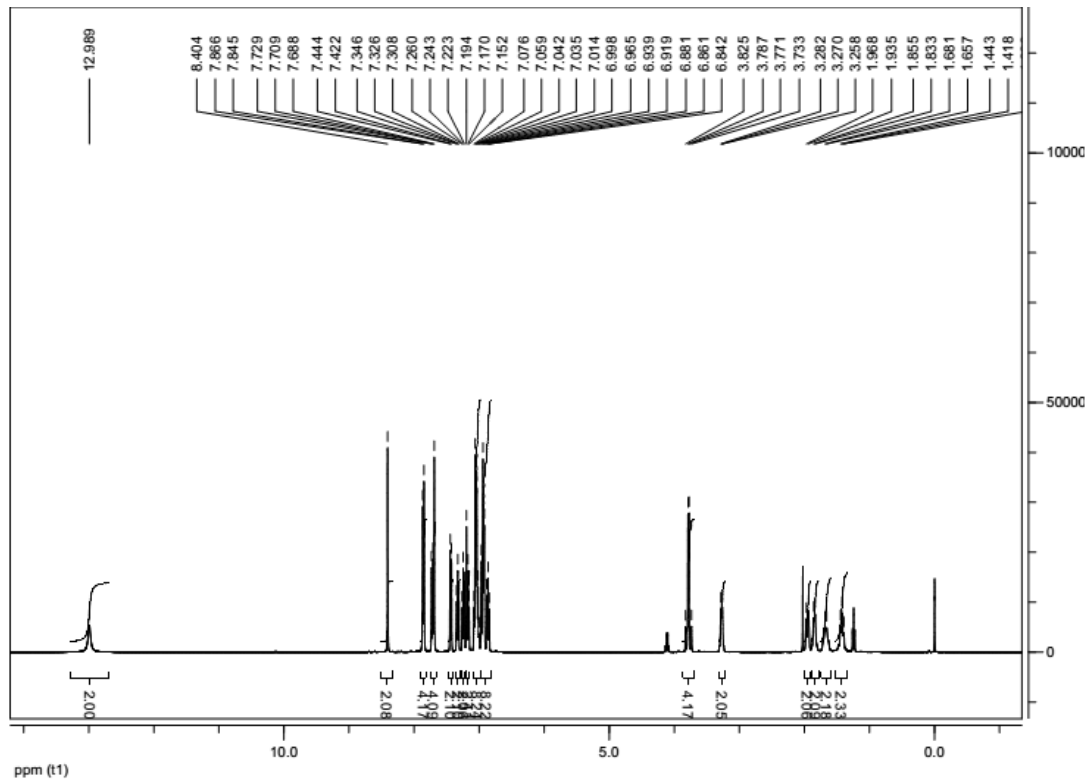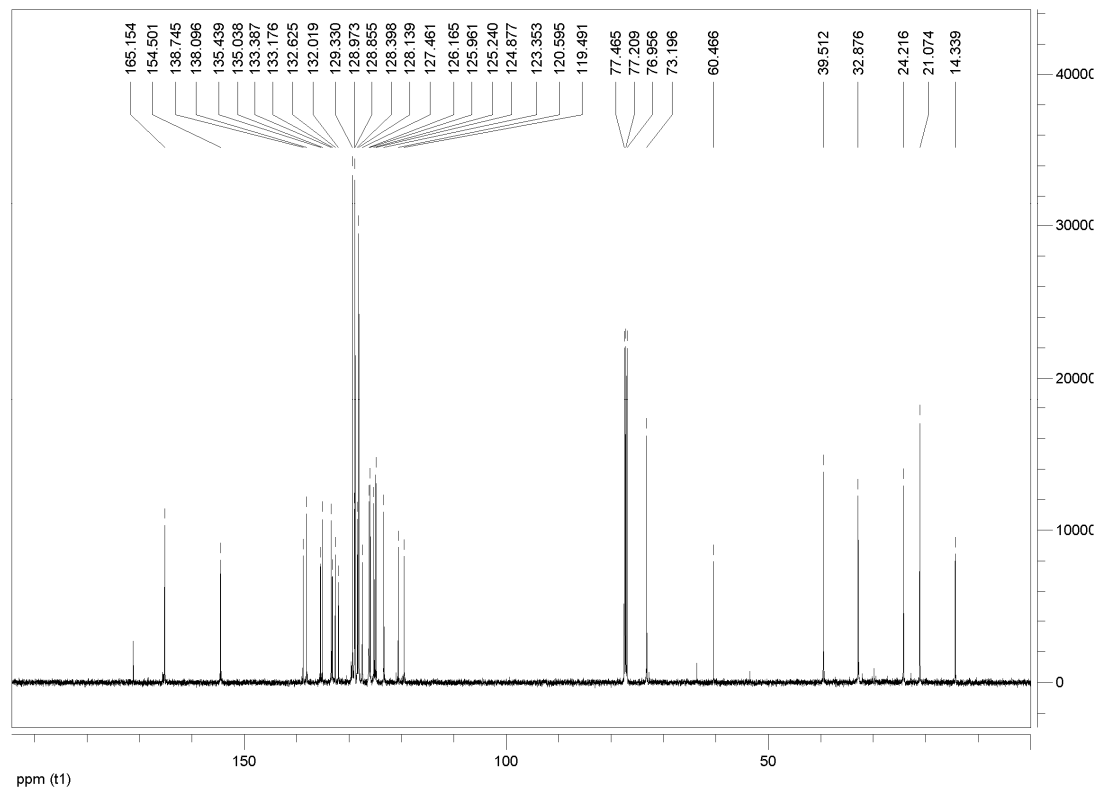

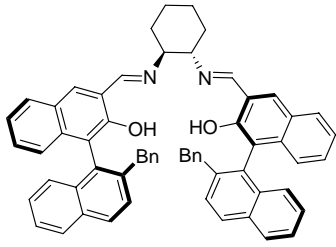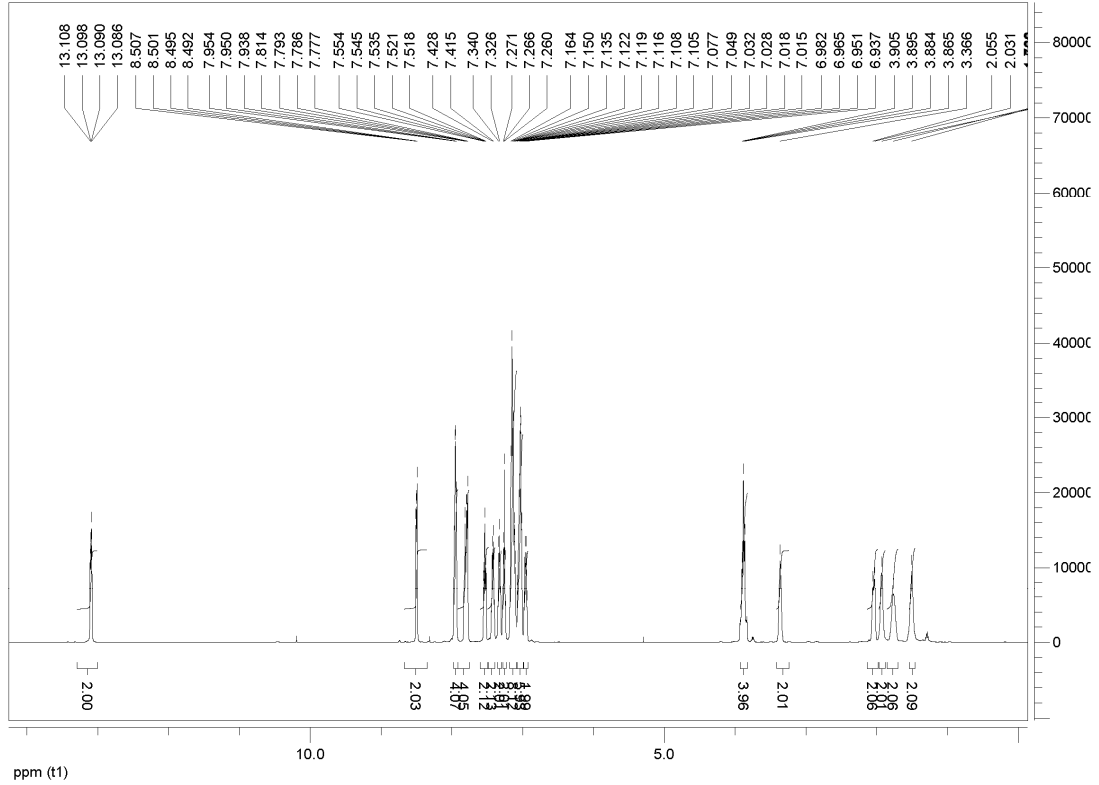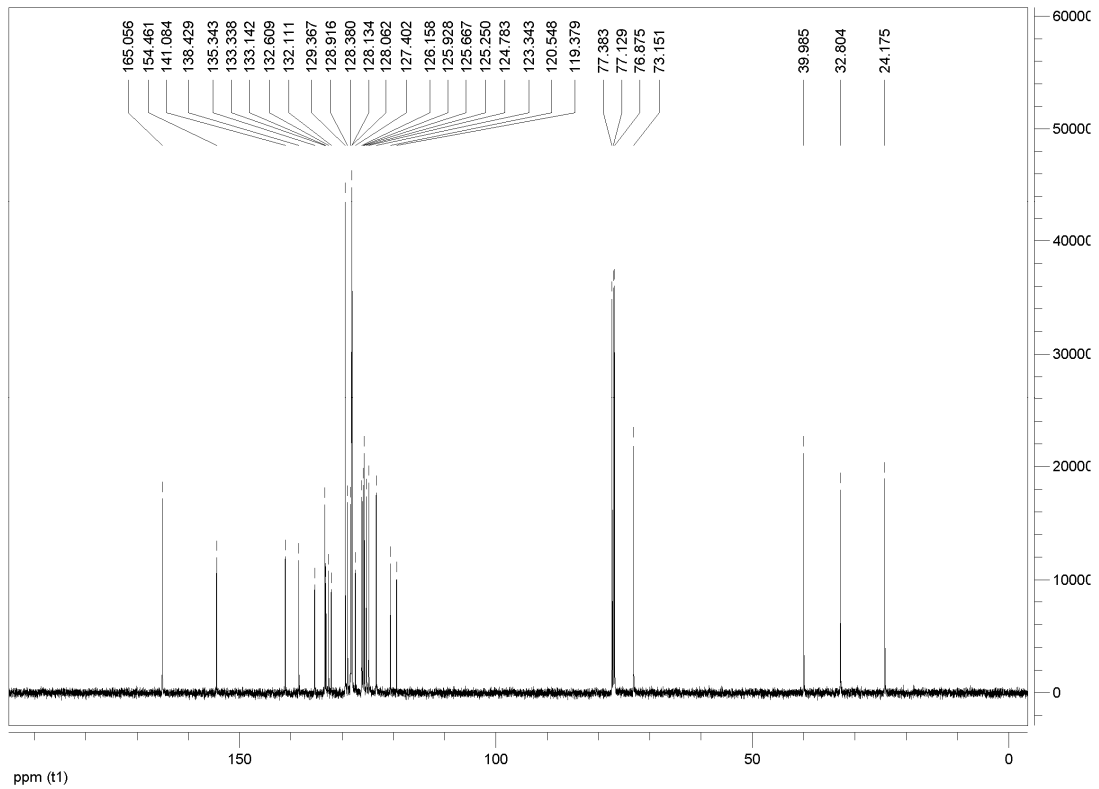



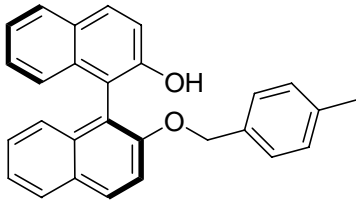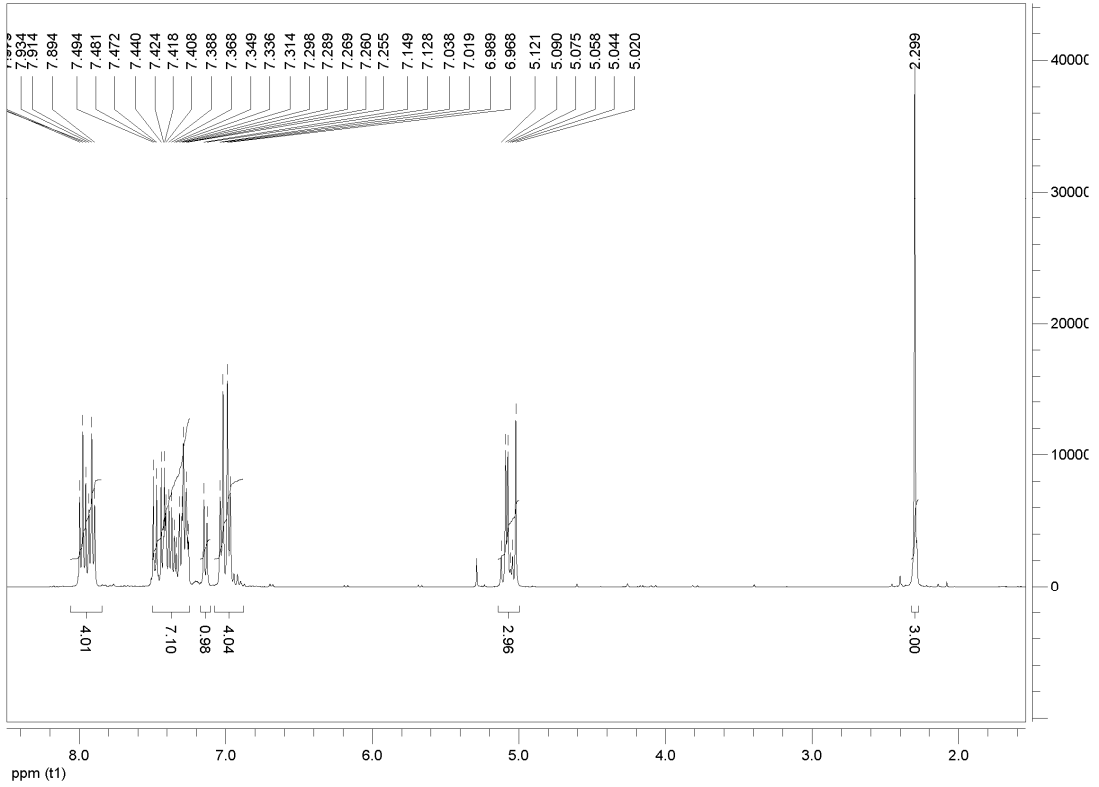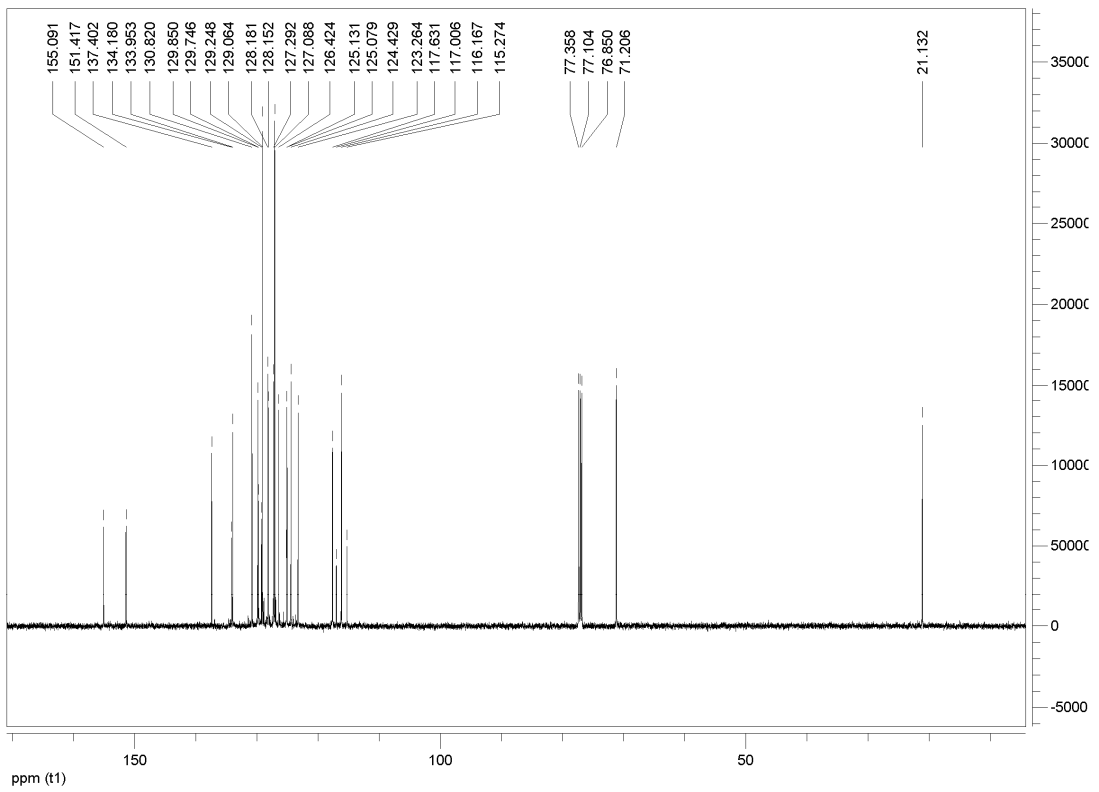



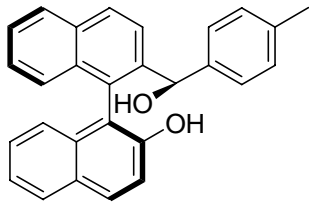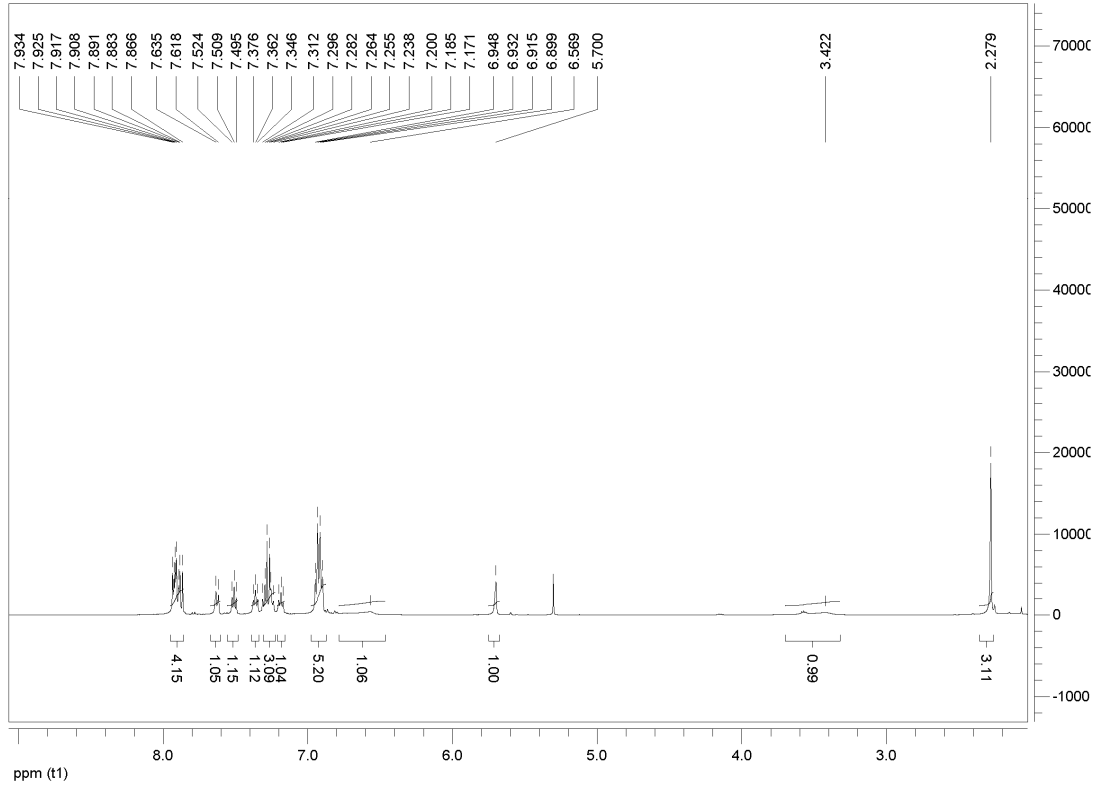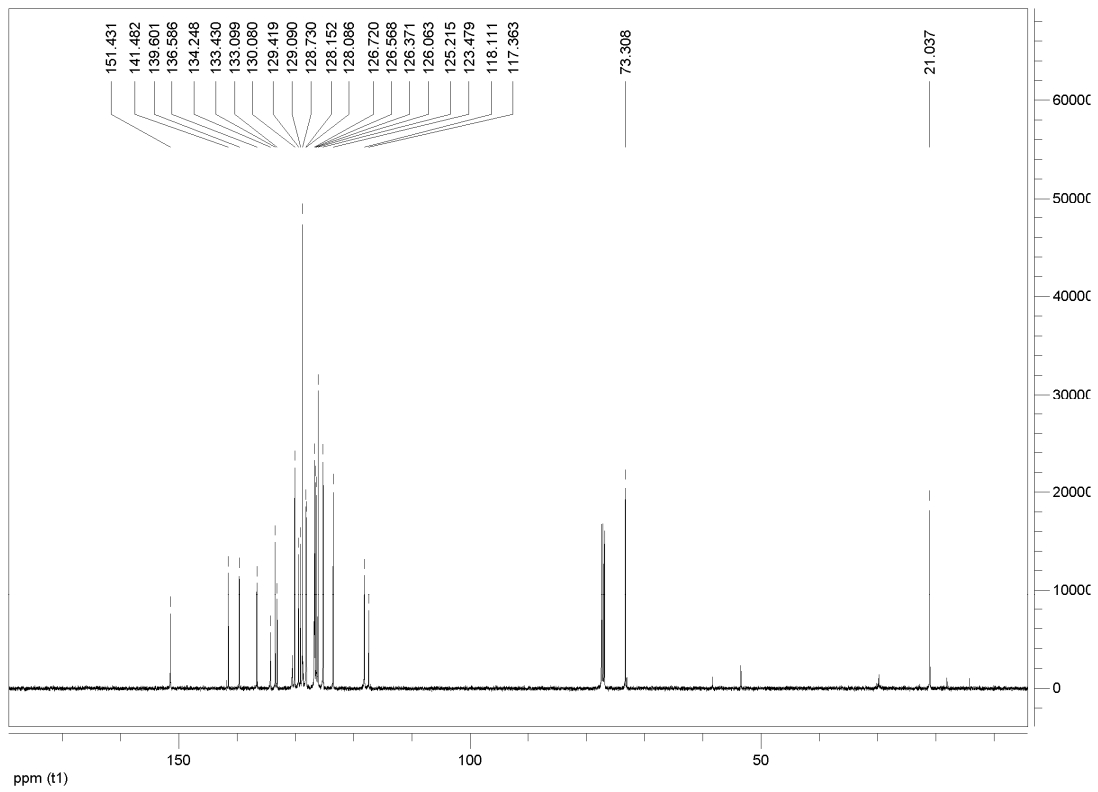

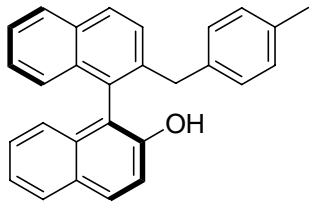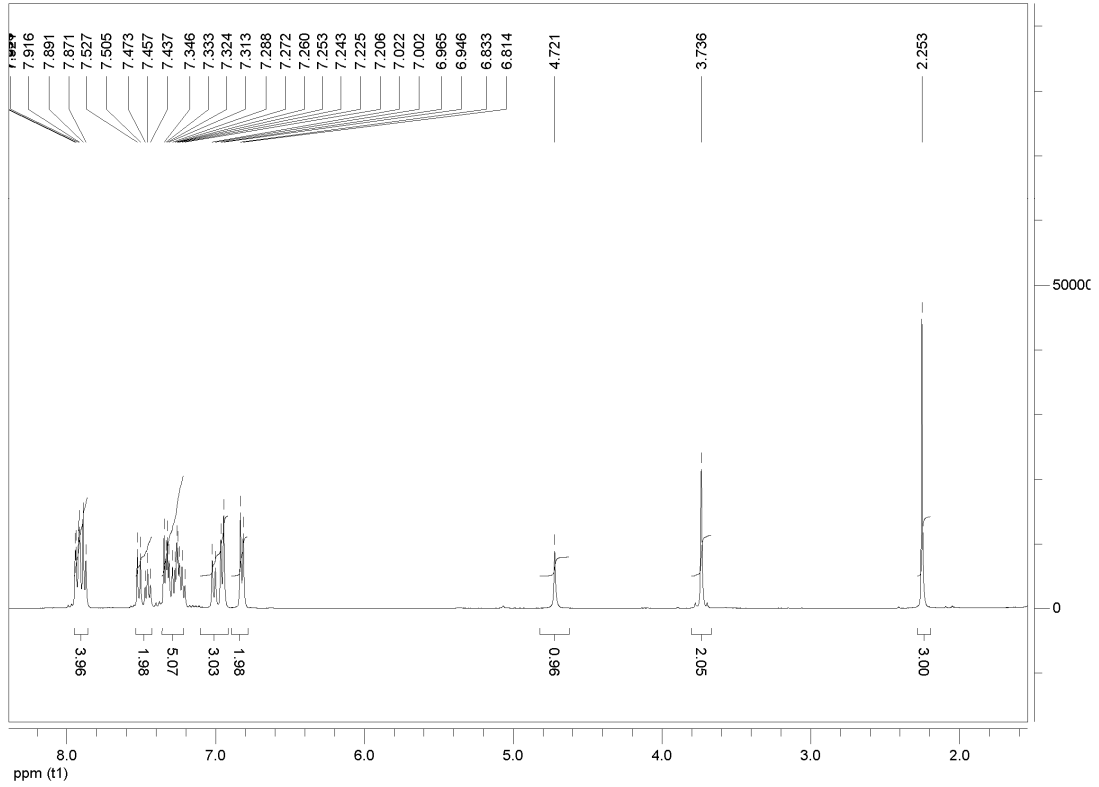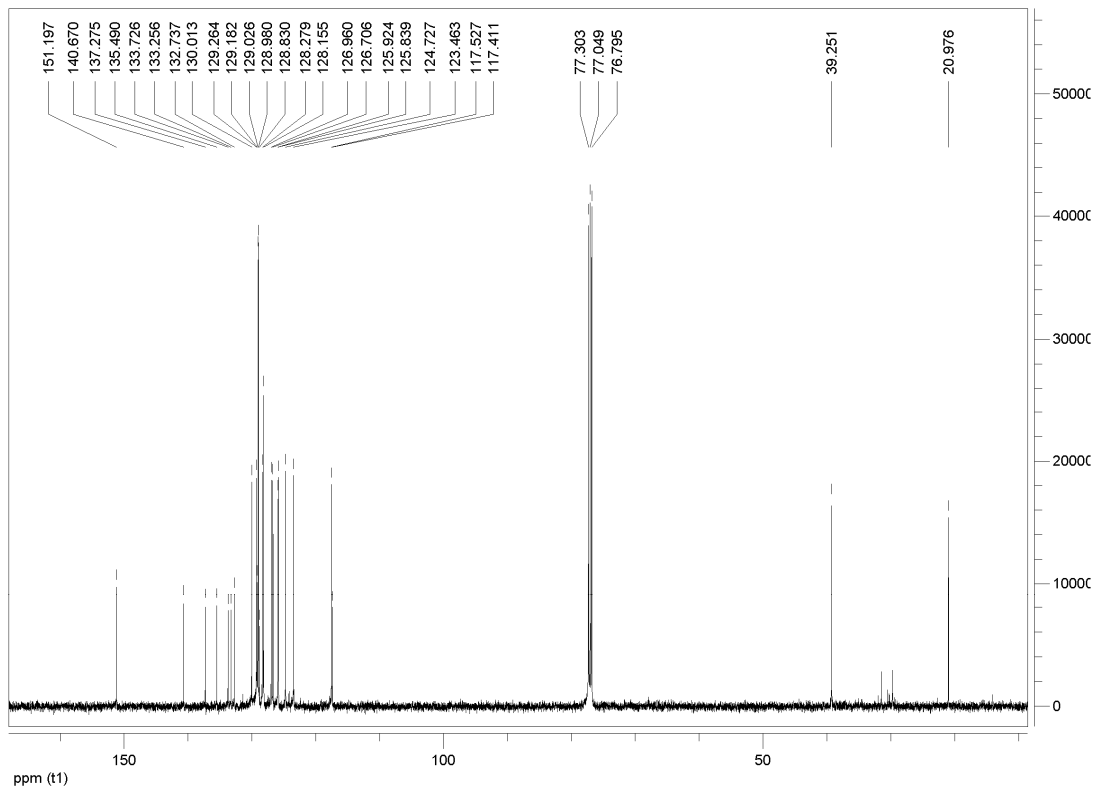

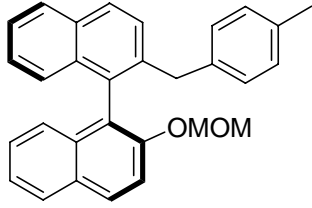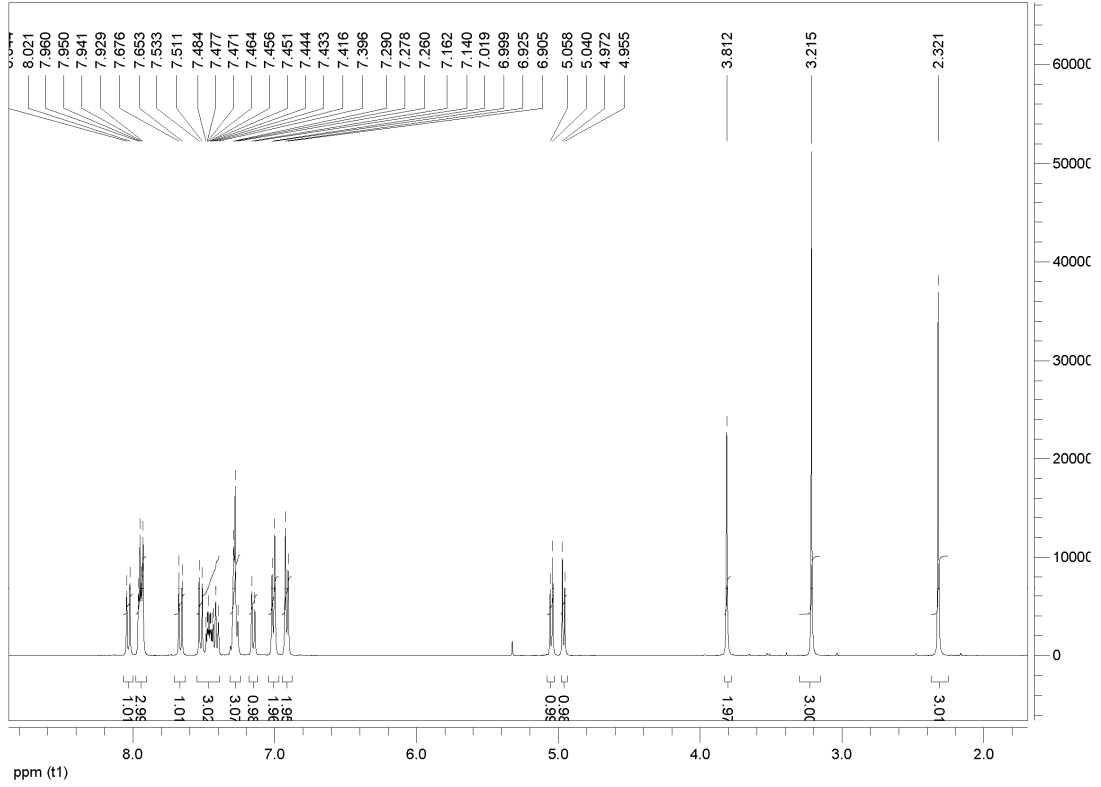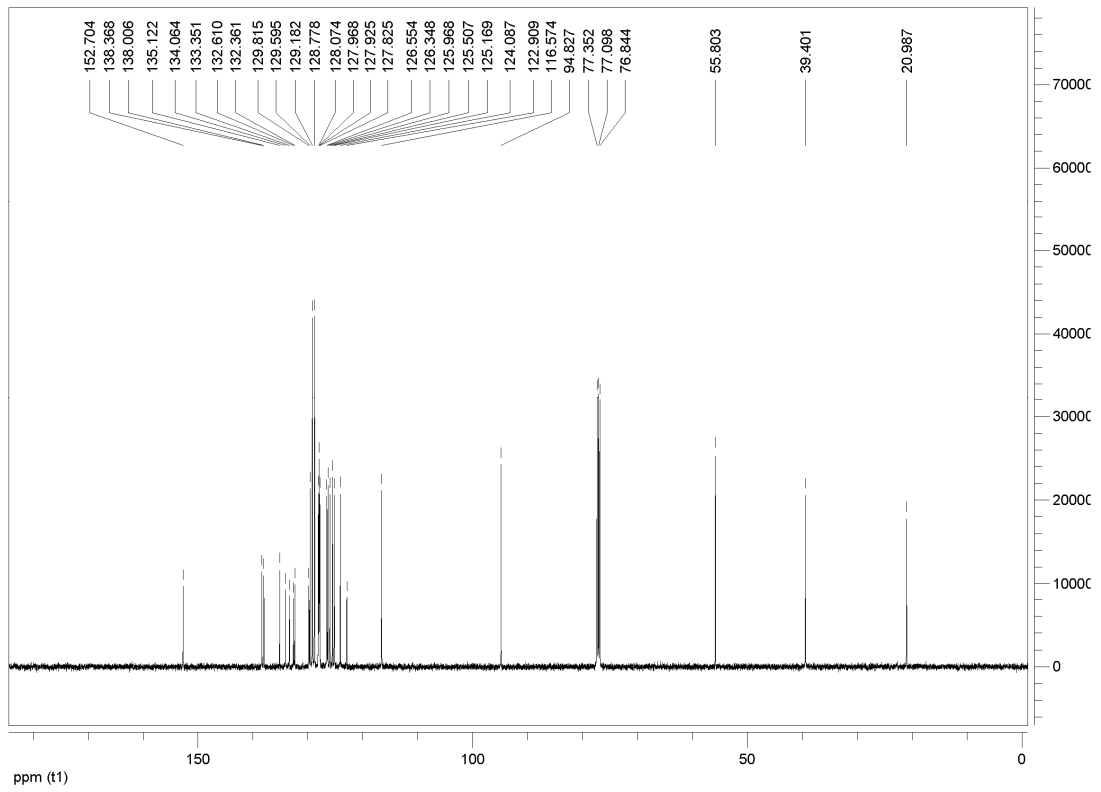

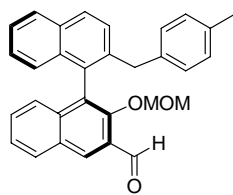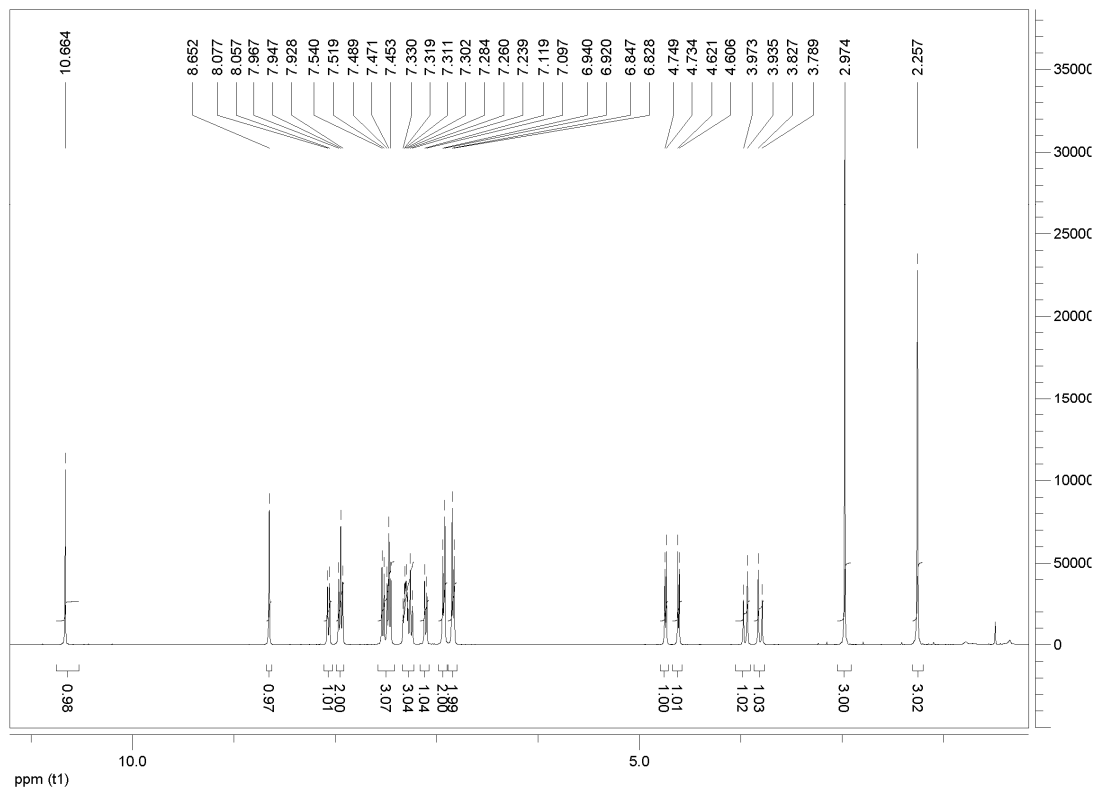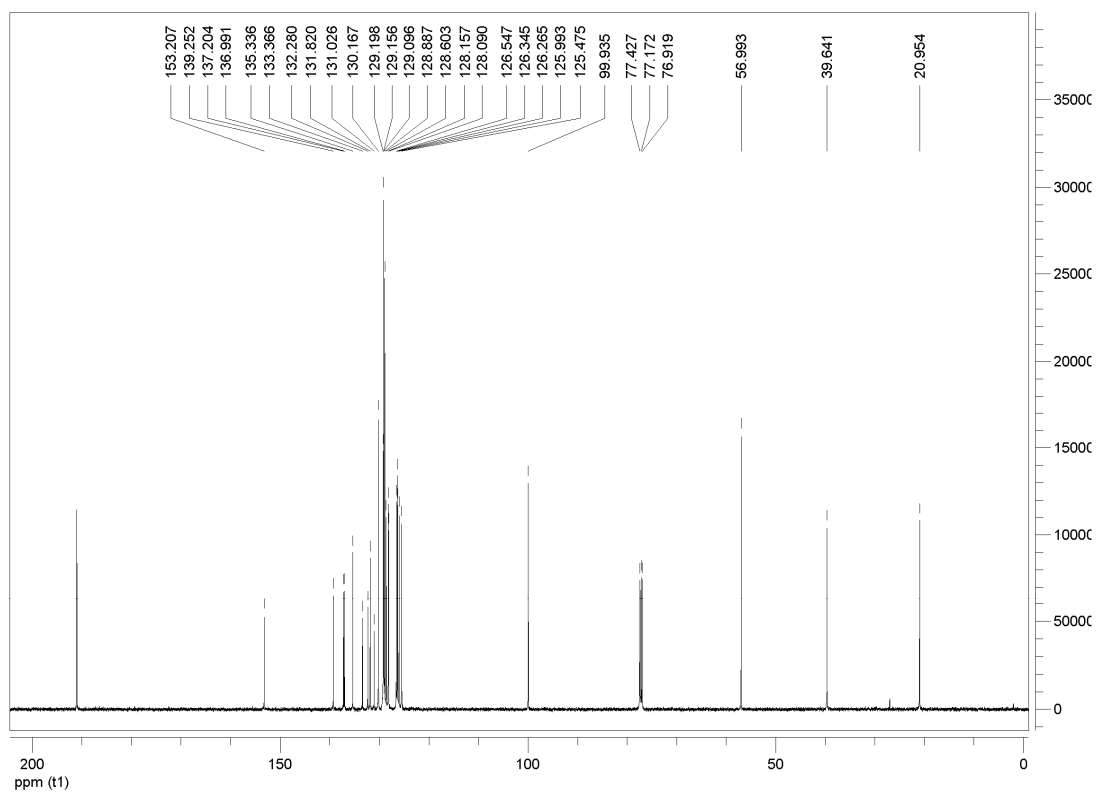

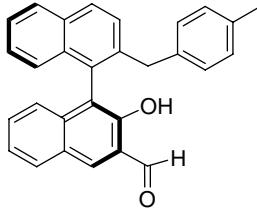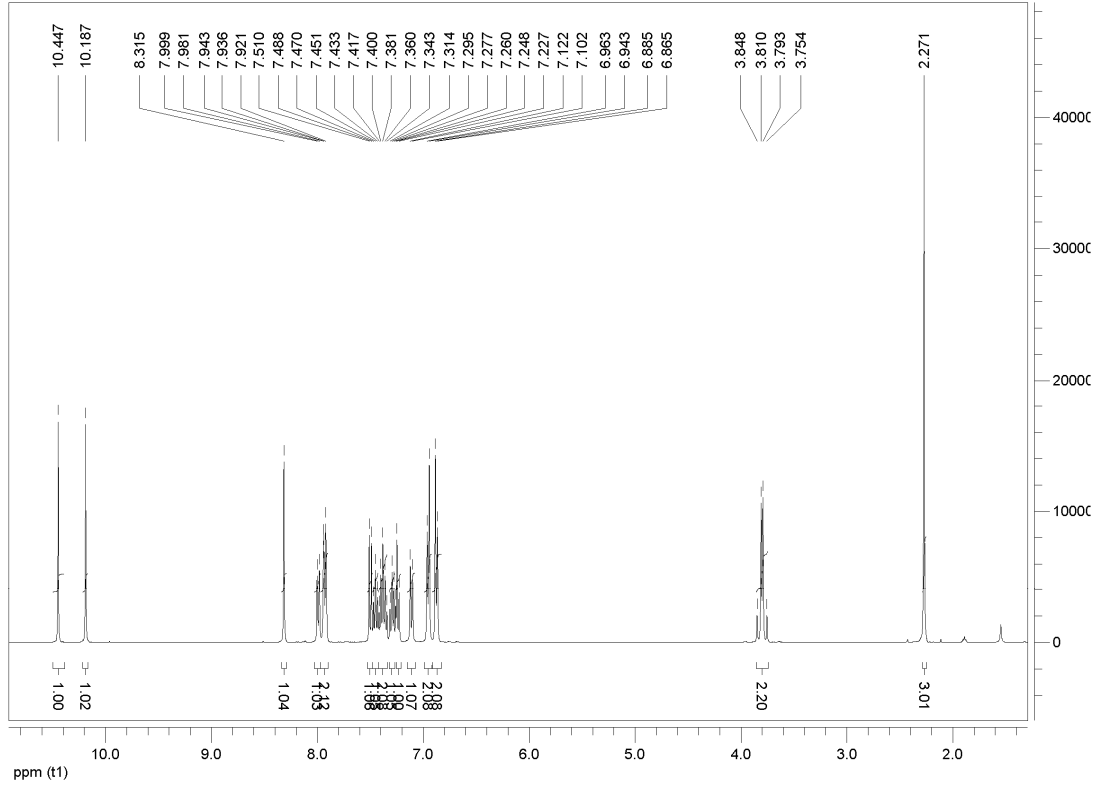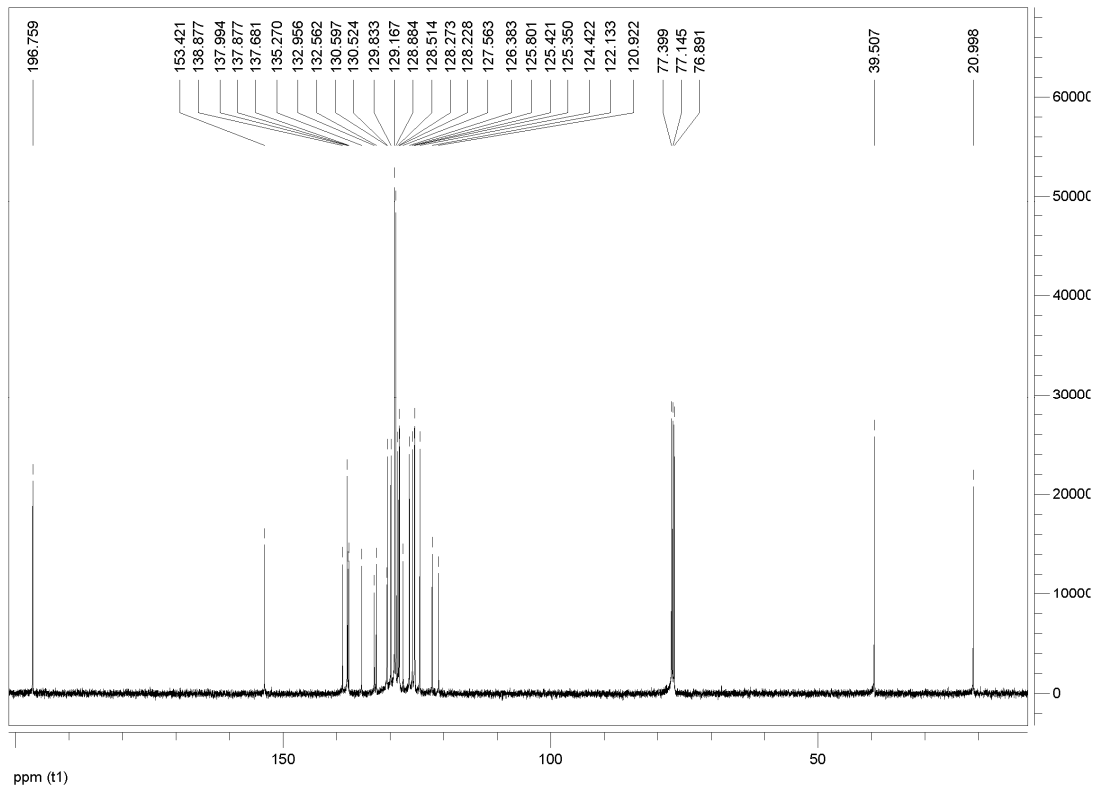

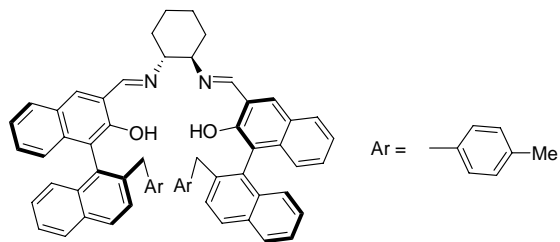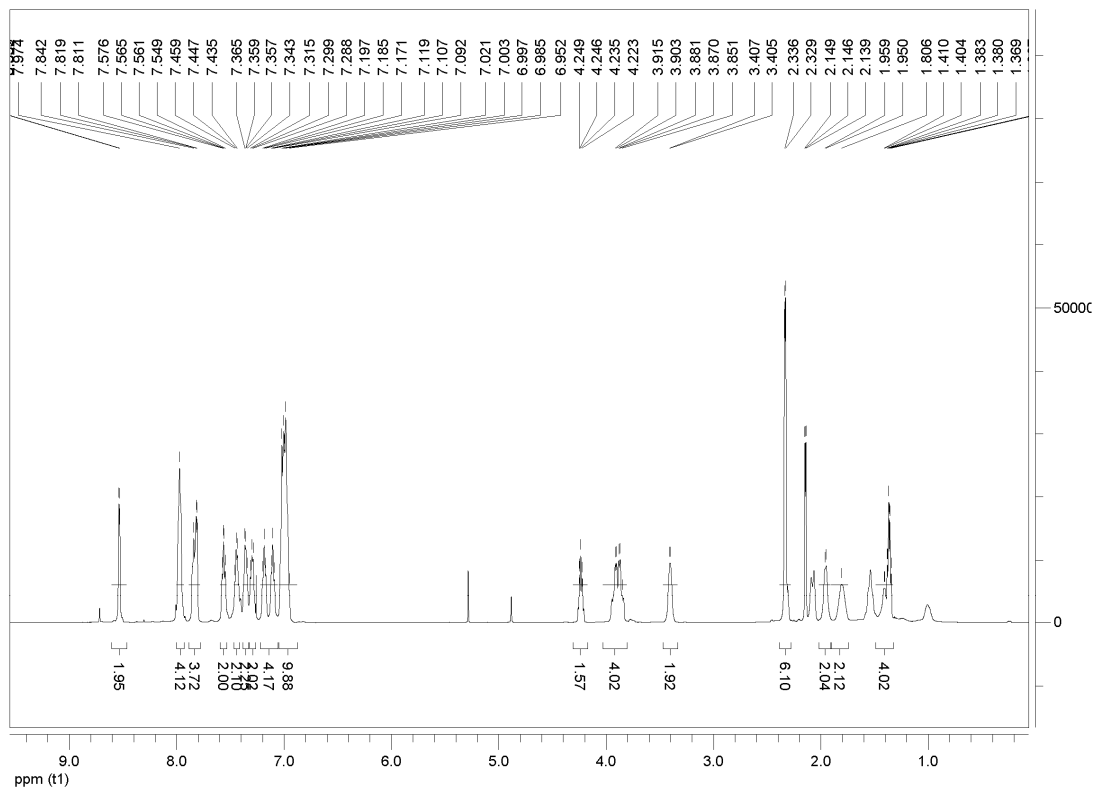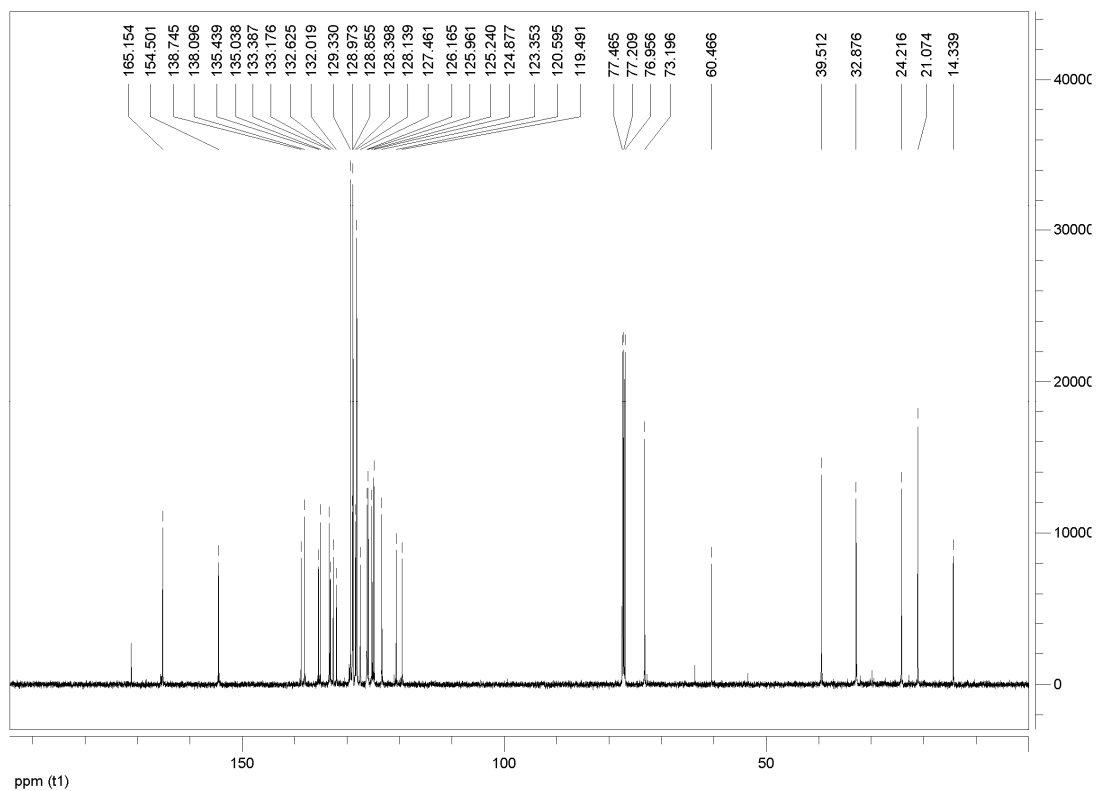

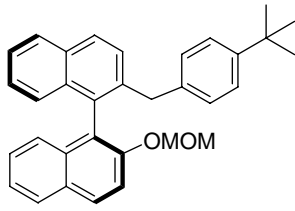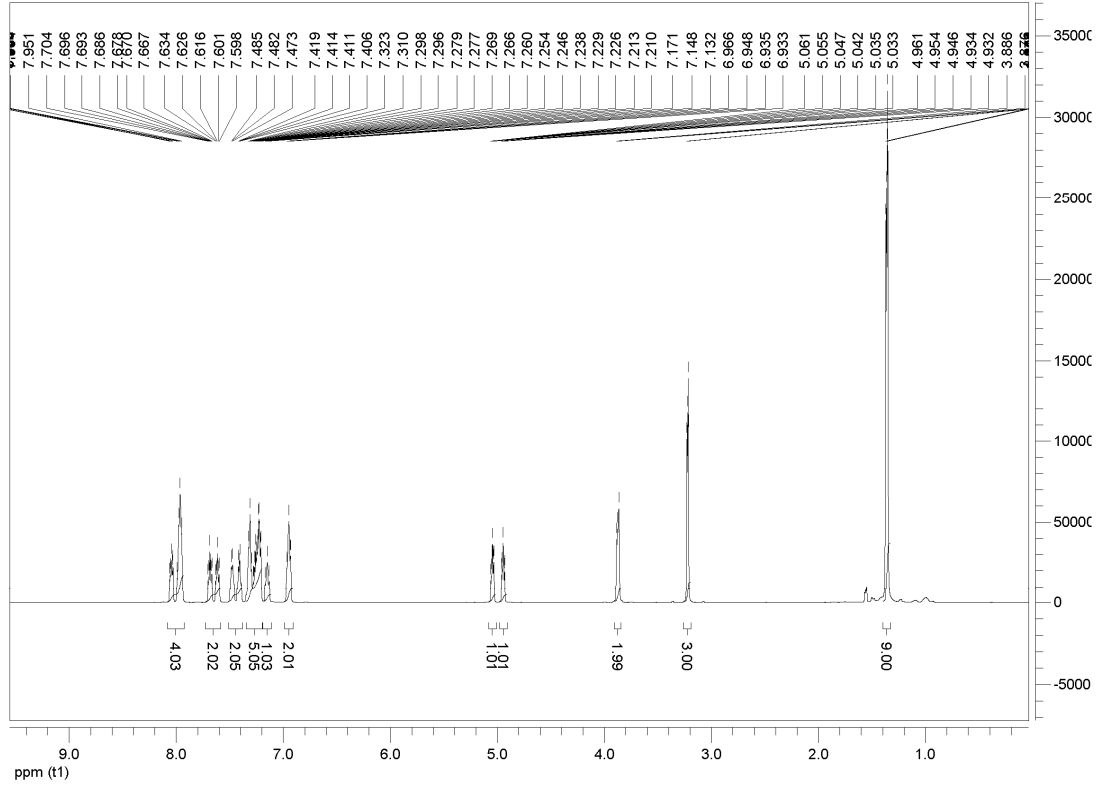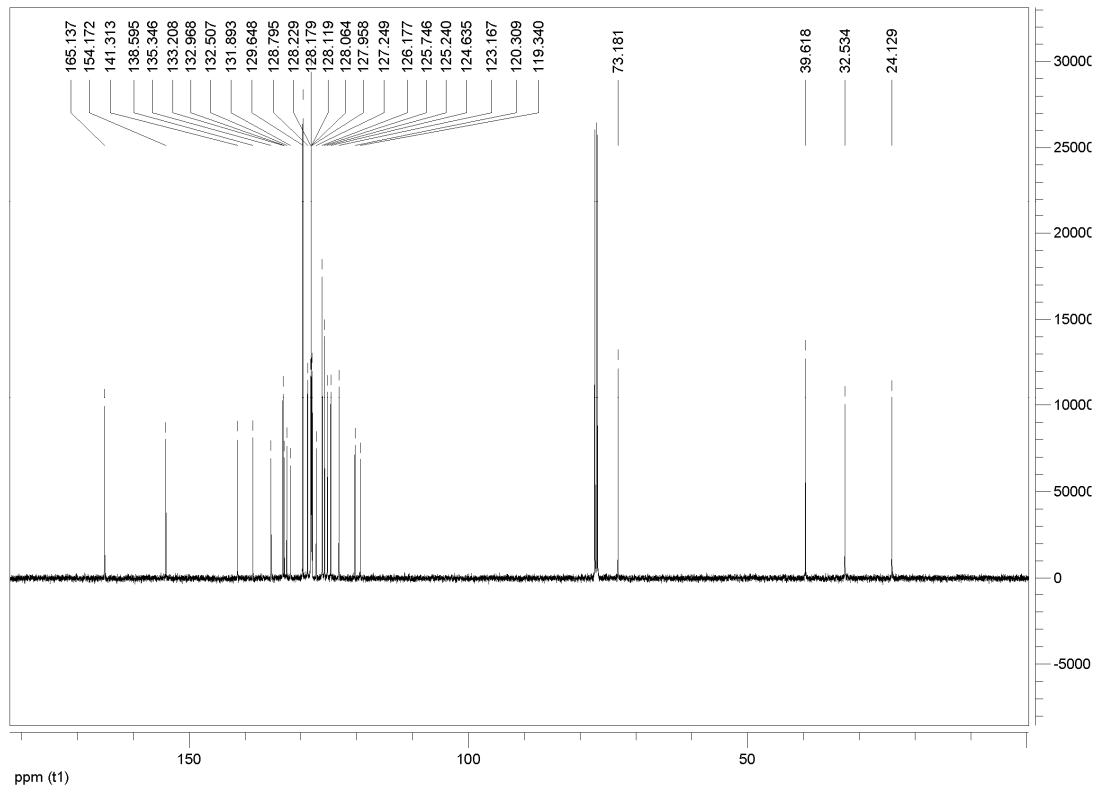

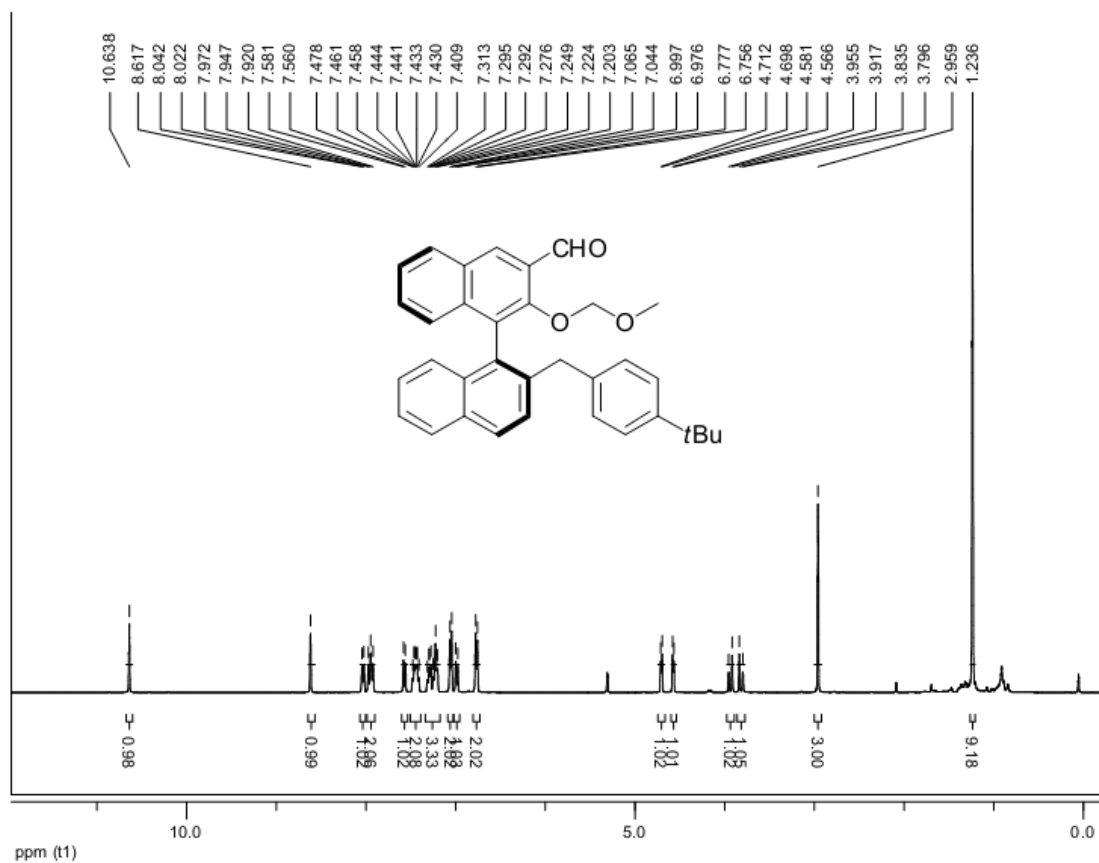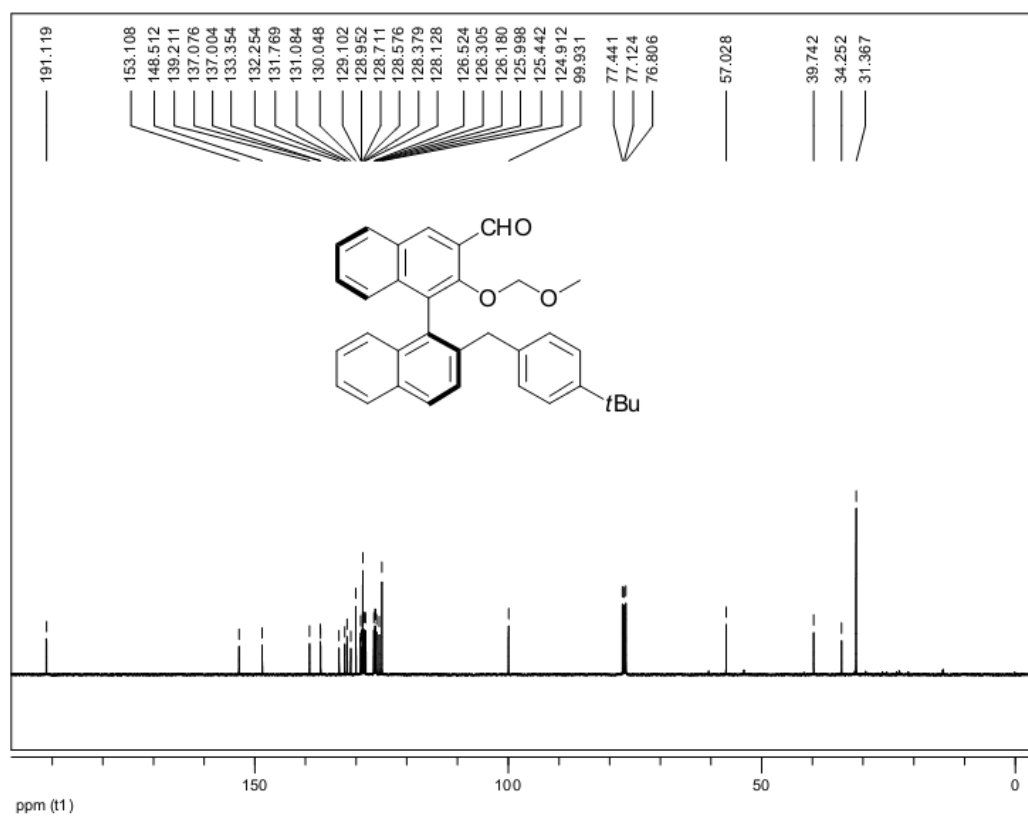



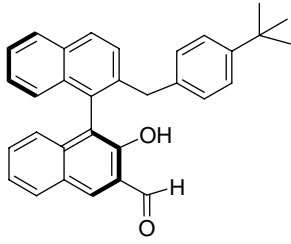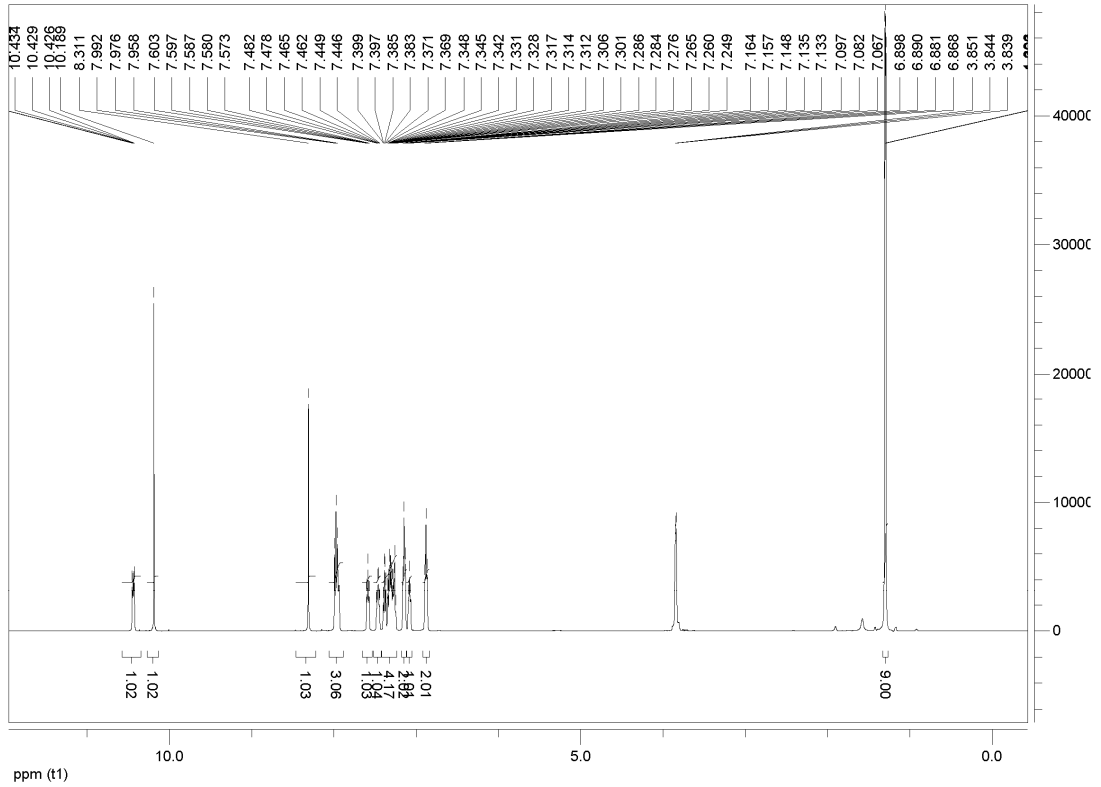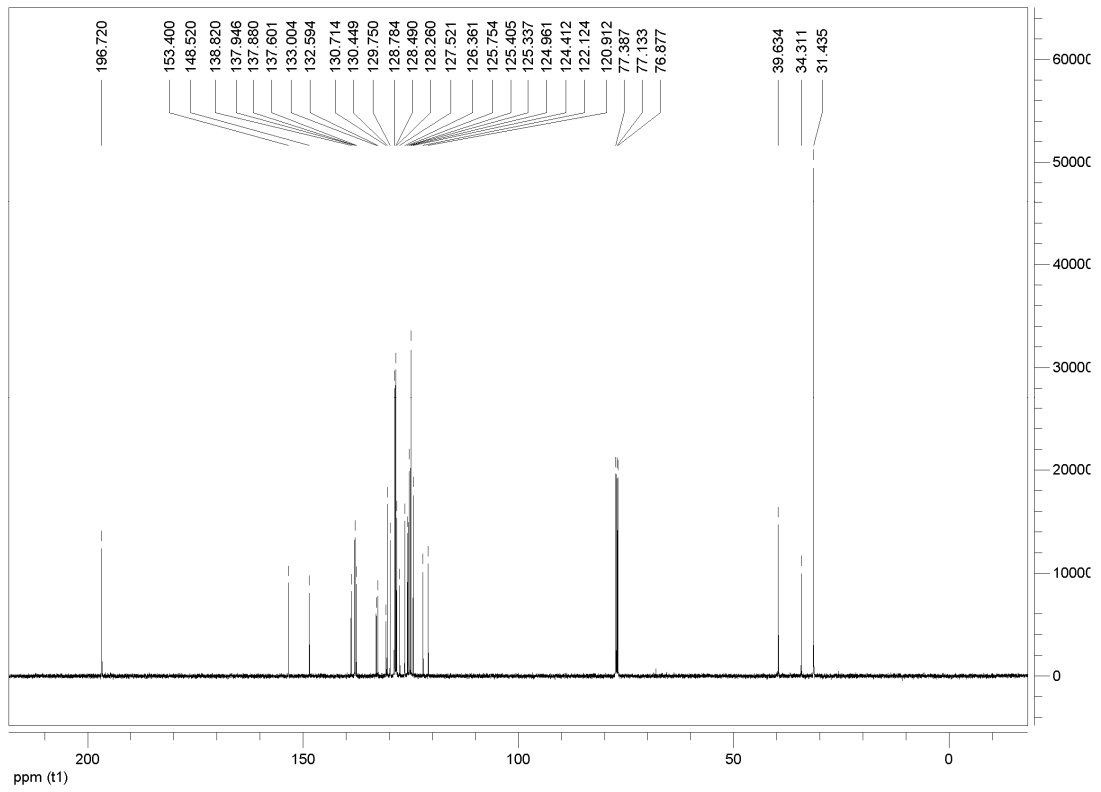



### Salan ligand 1:

### <sup>1</sup>H NMR

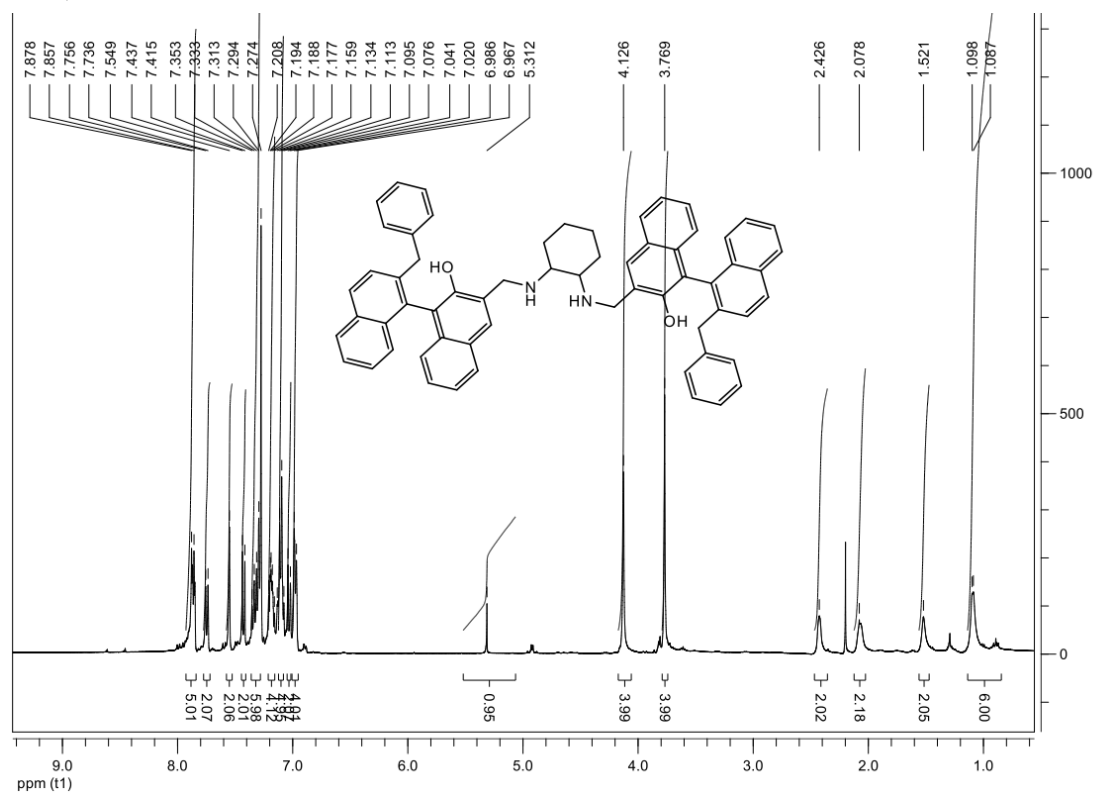

### <sup>13</sup>C NMR

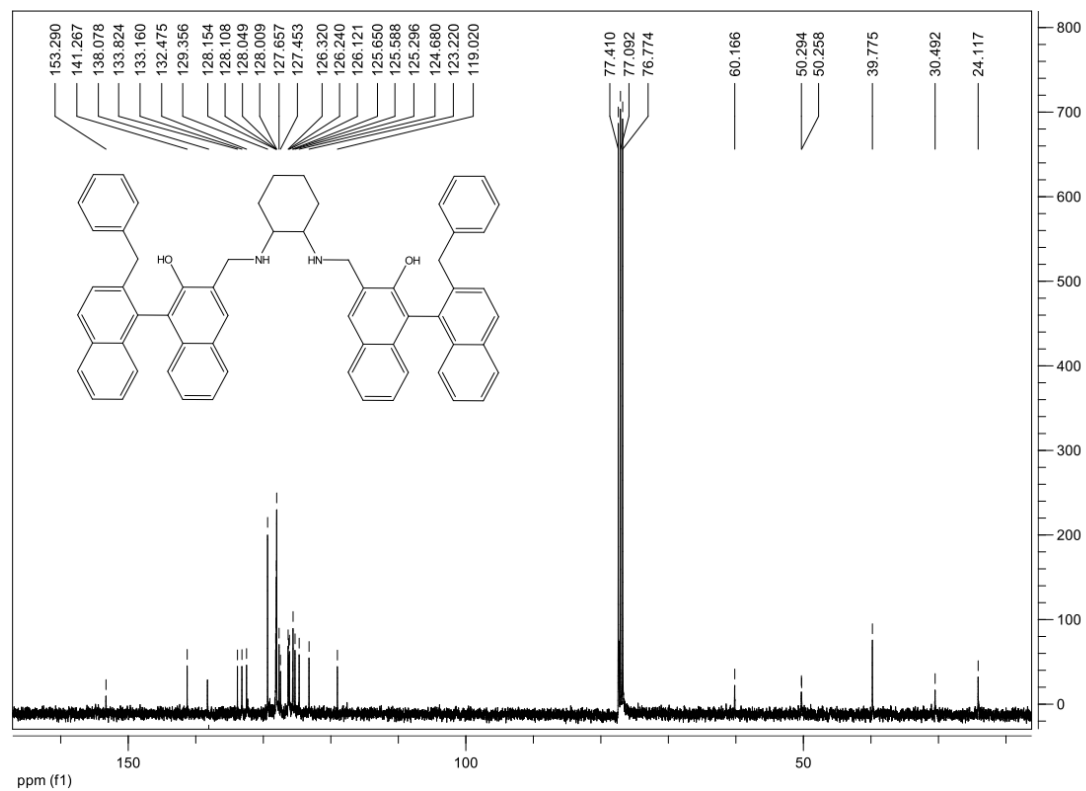

# <sup>1</sup>H NMR

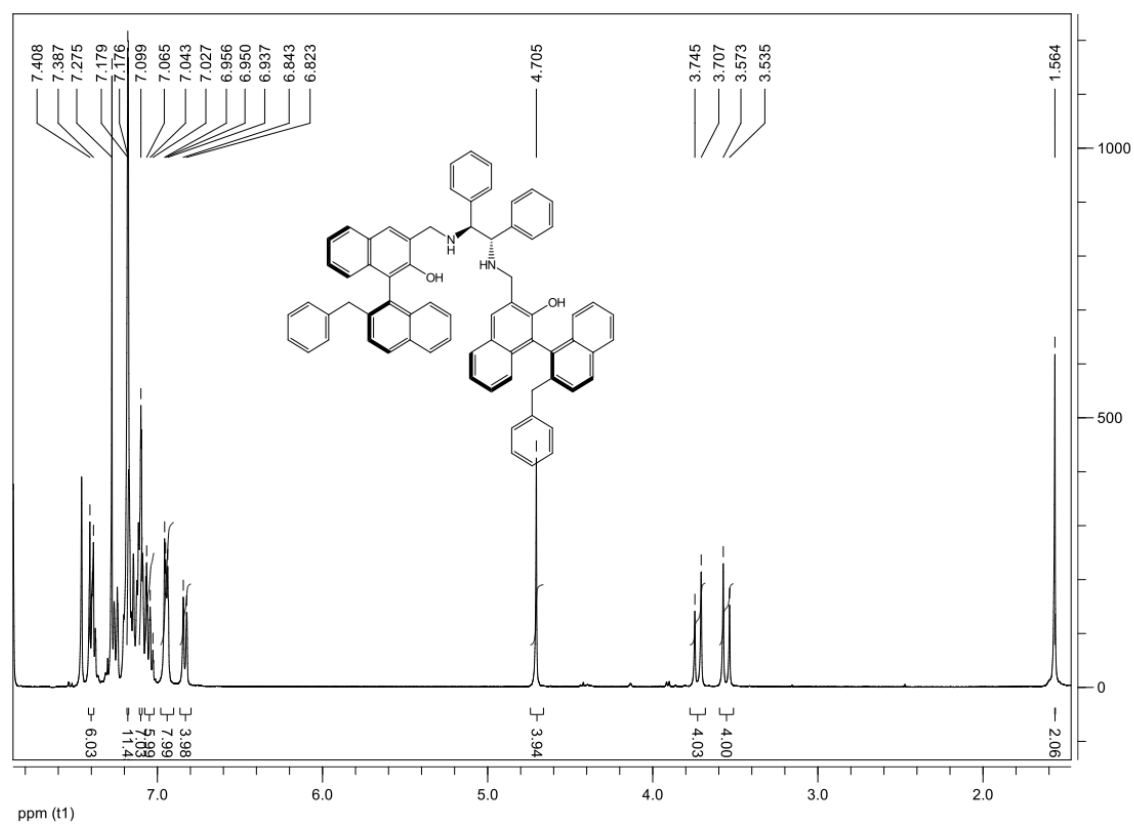

# <sup>13</sup>C NMR

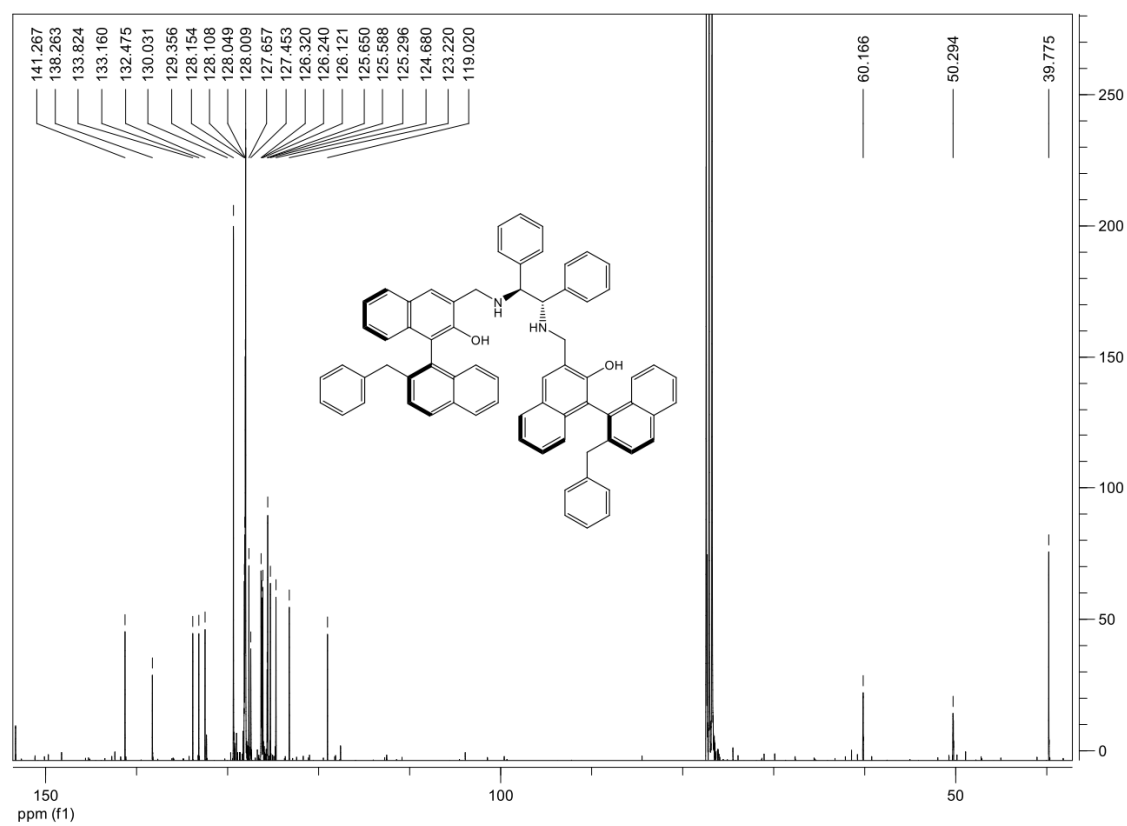

TM salan-3: <sup>1</sup>H NMR

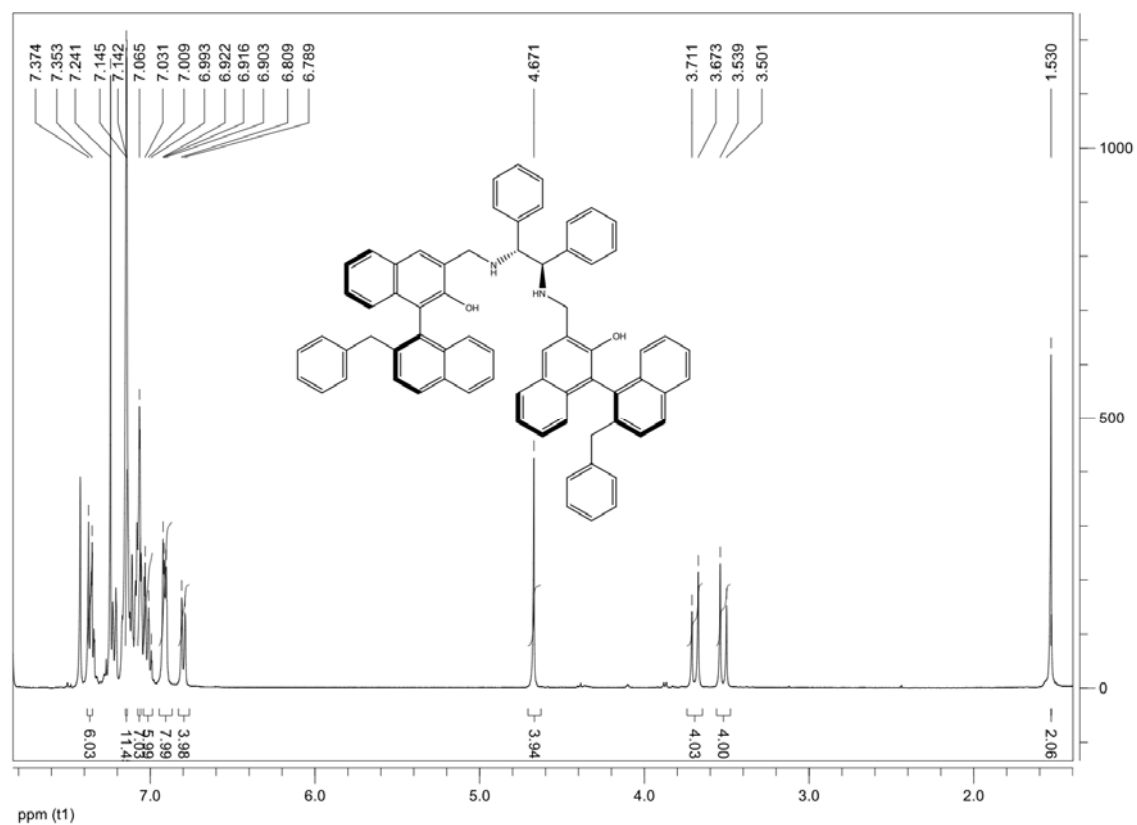

<sup>13</sup>C NMR

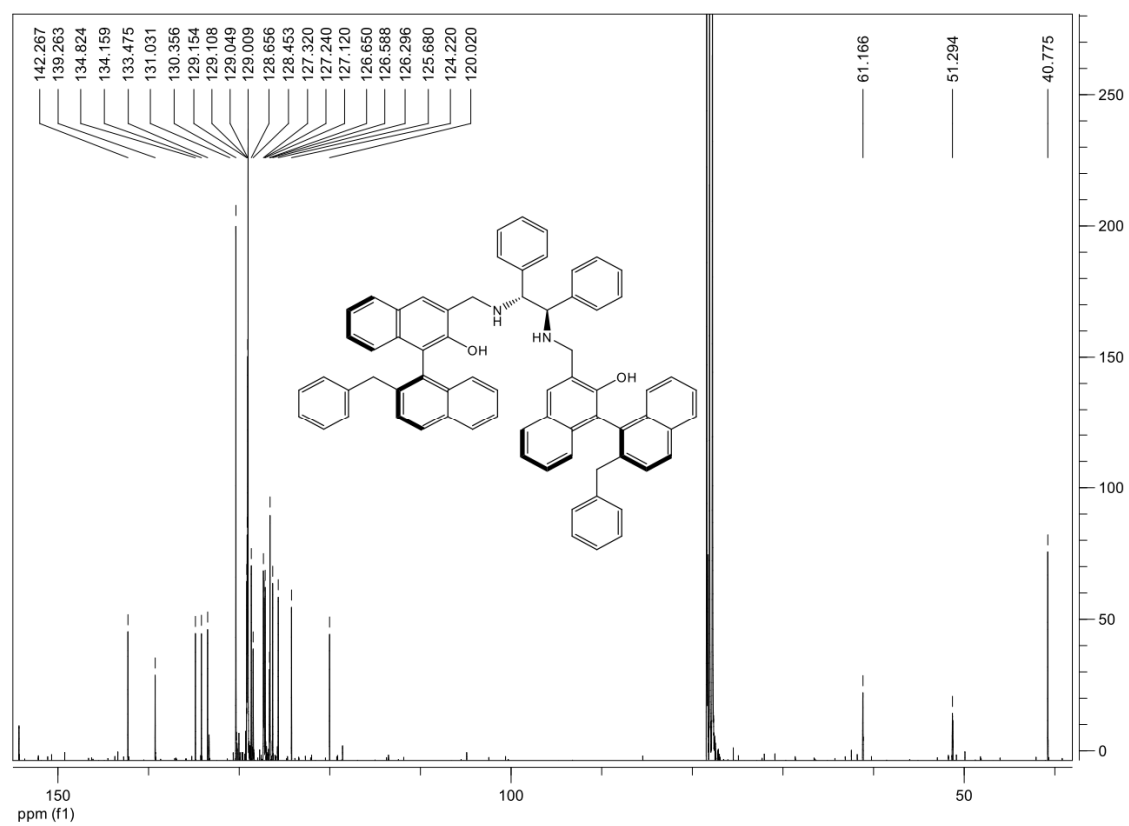

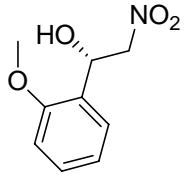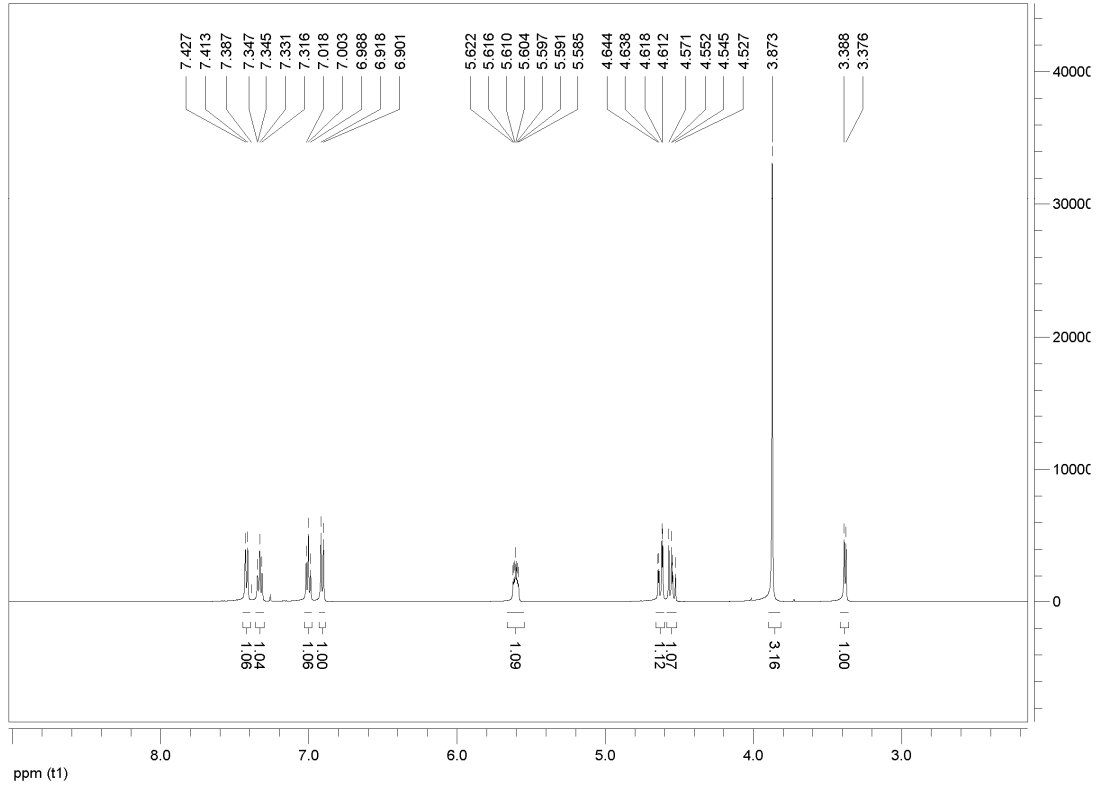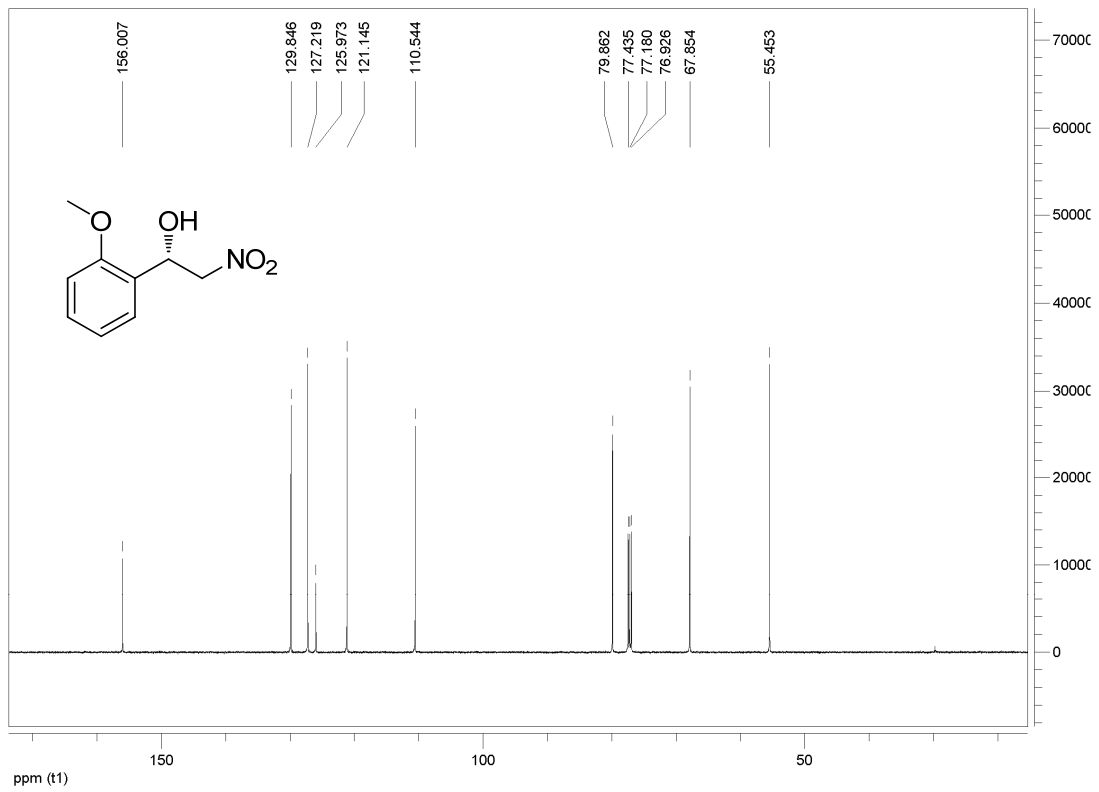

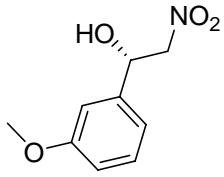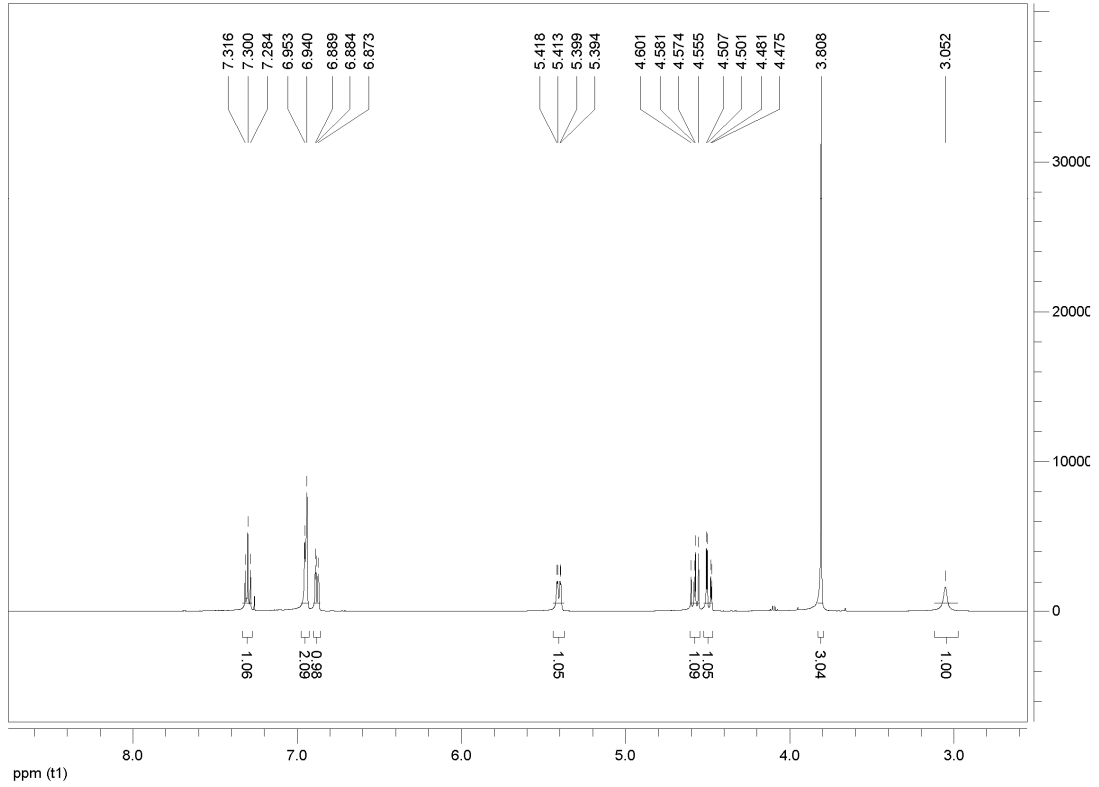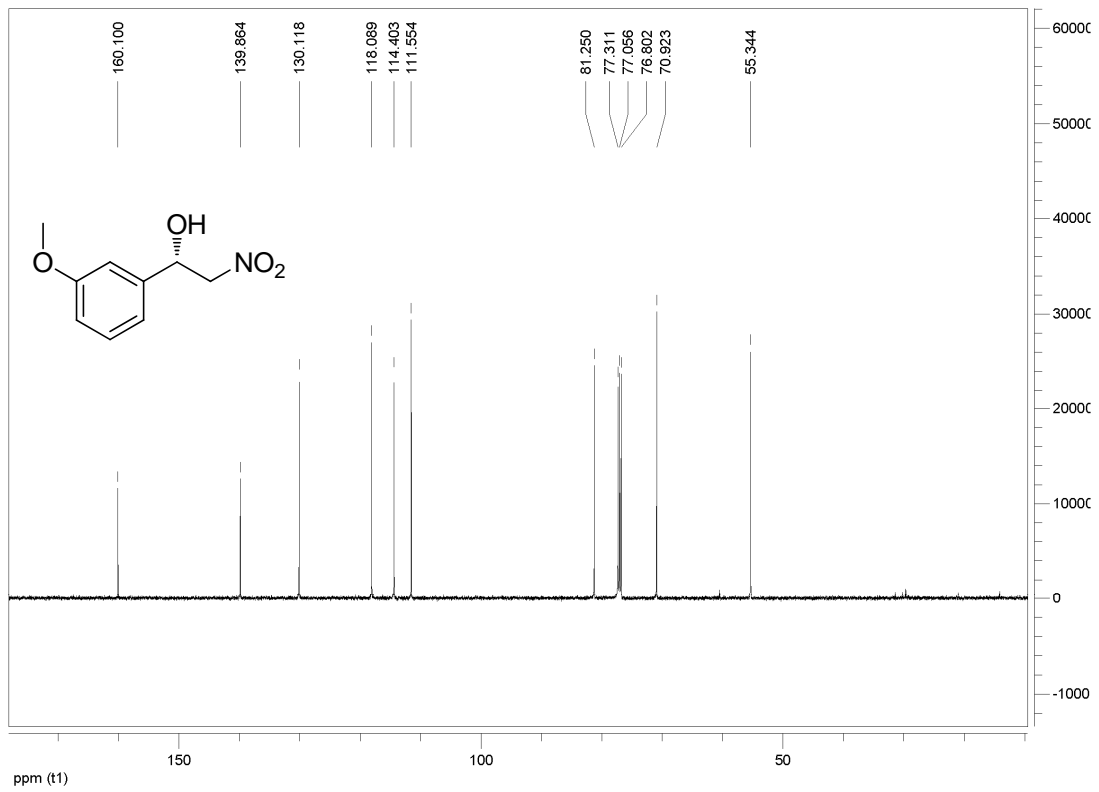

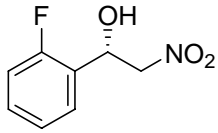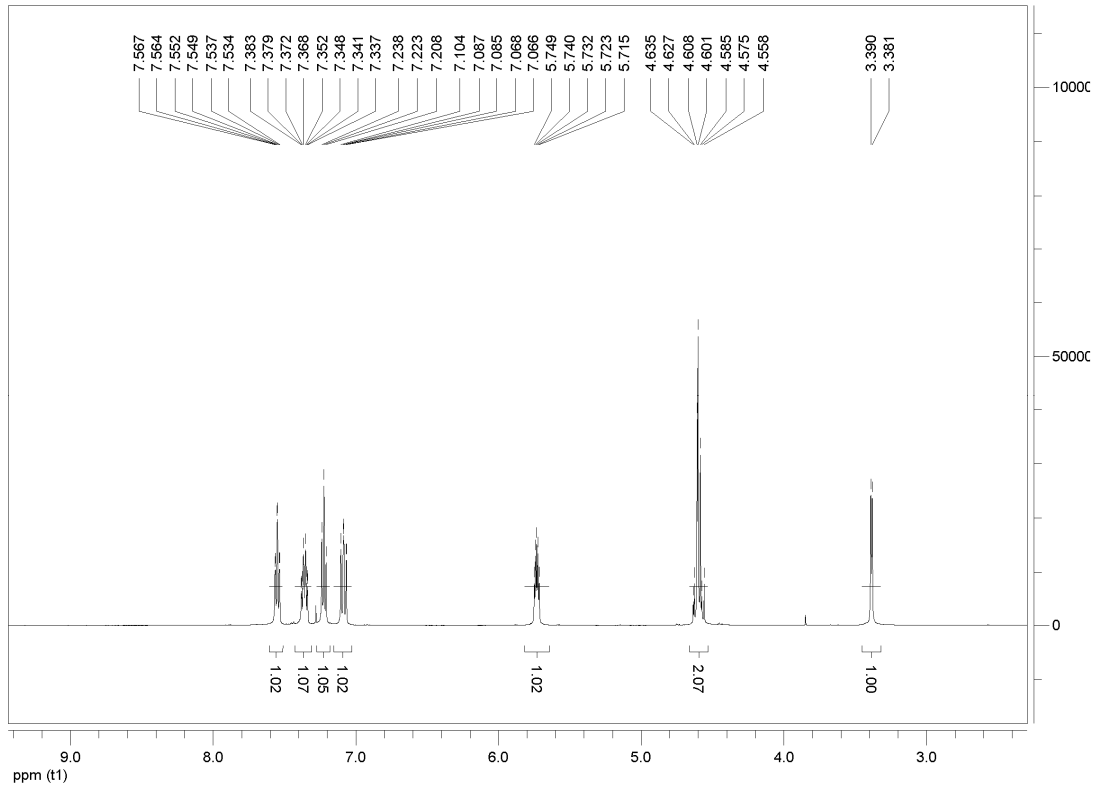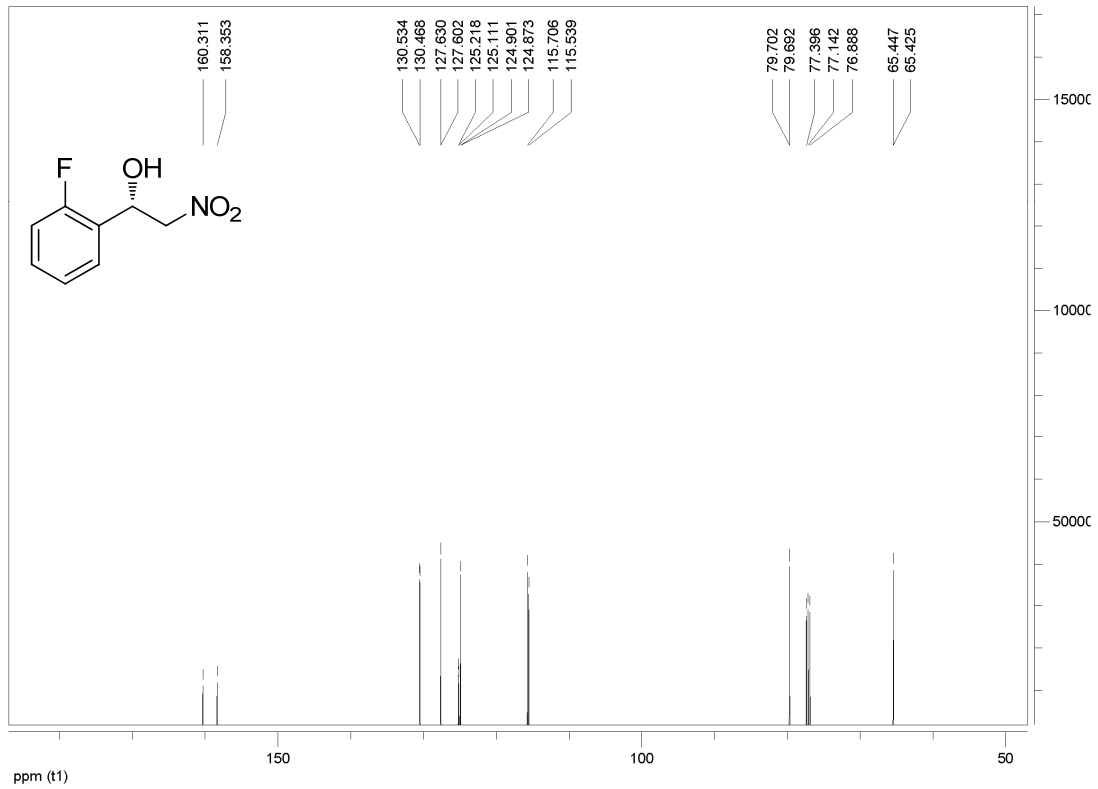



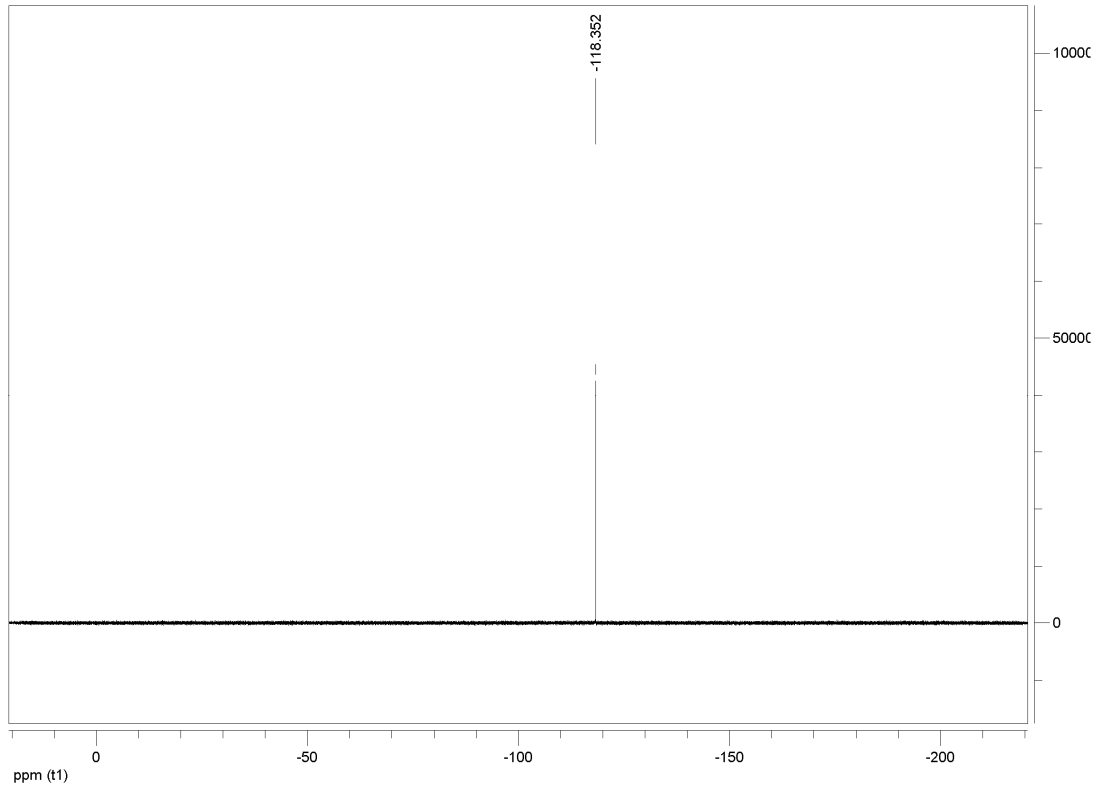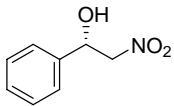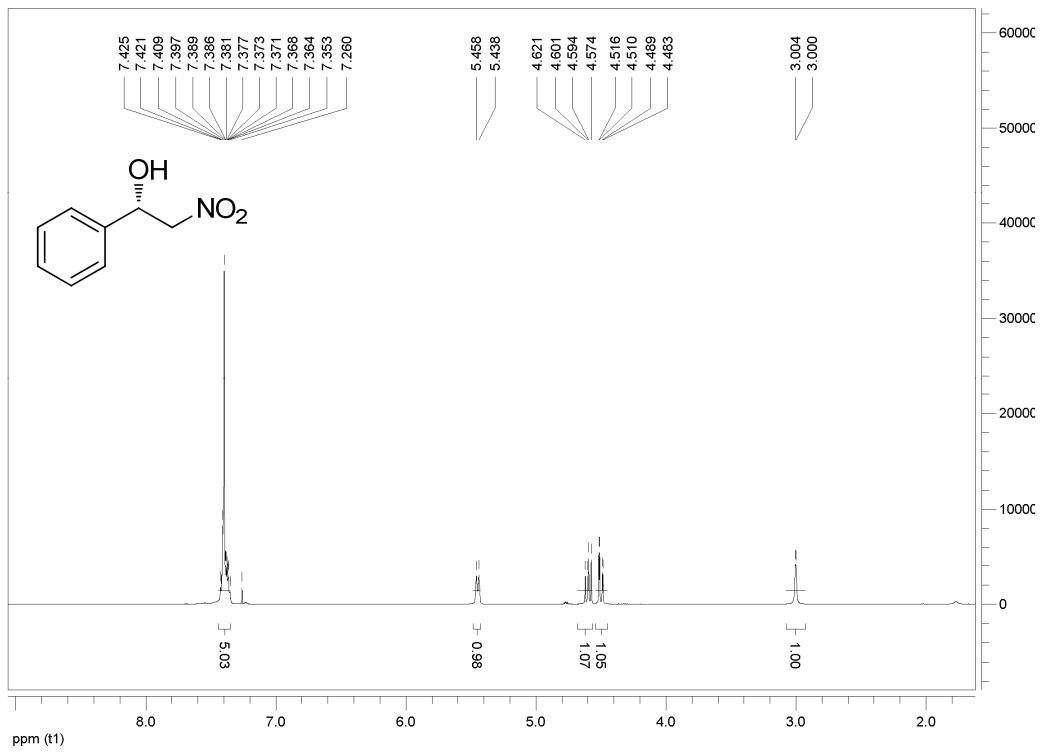

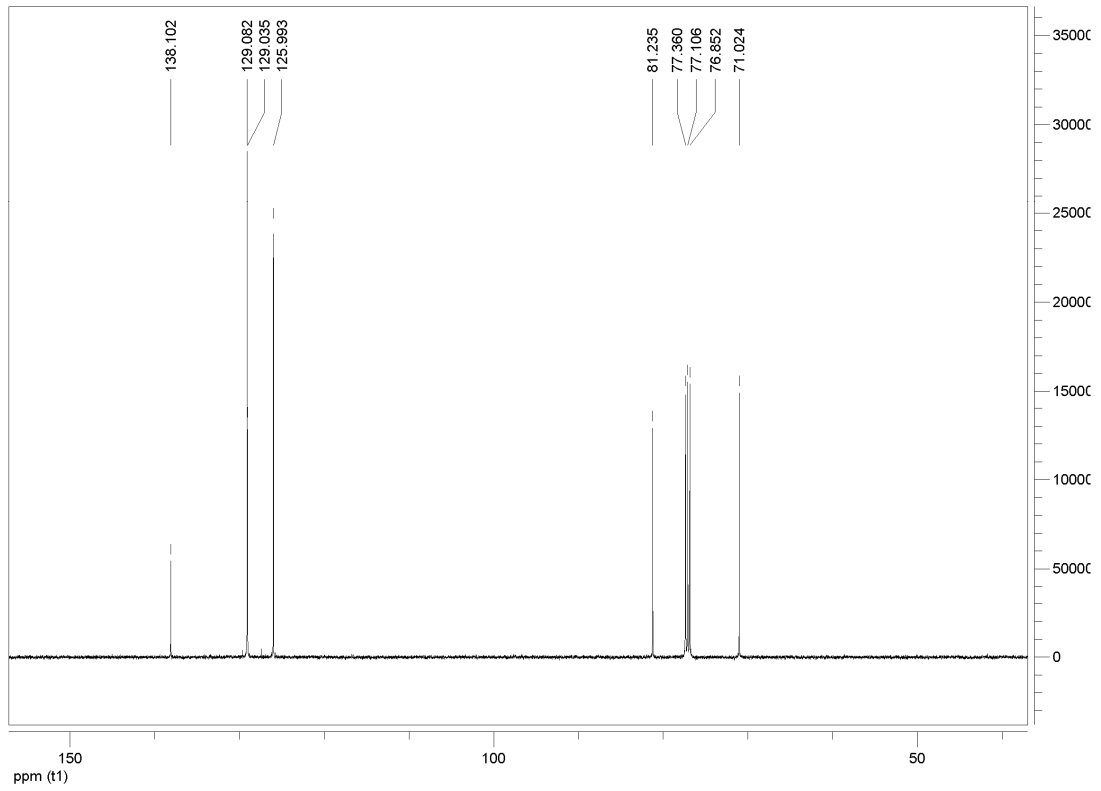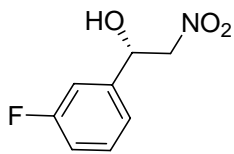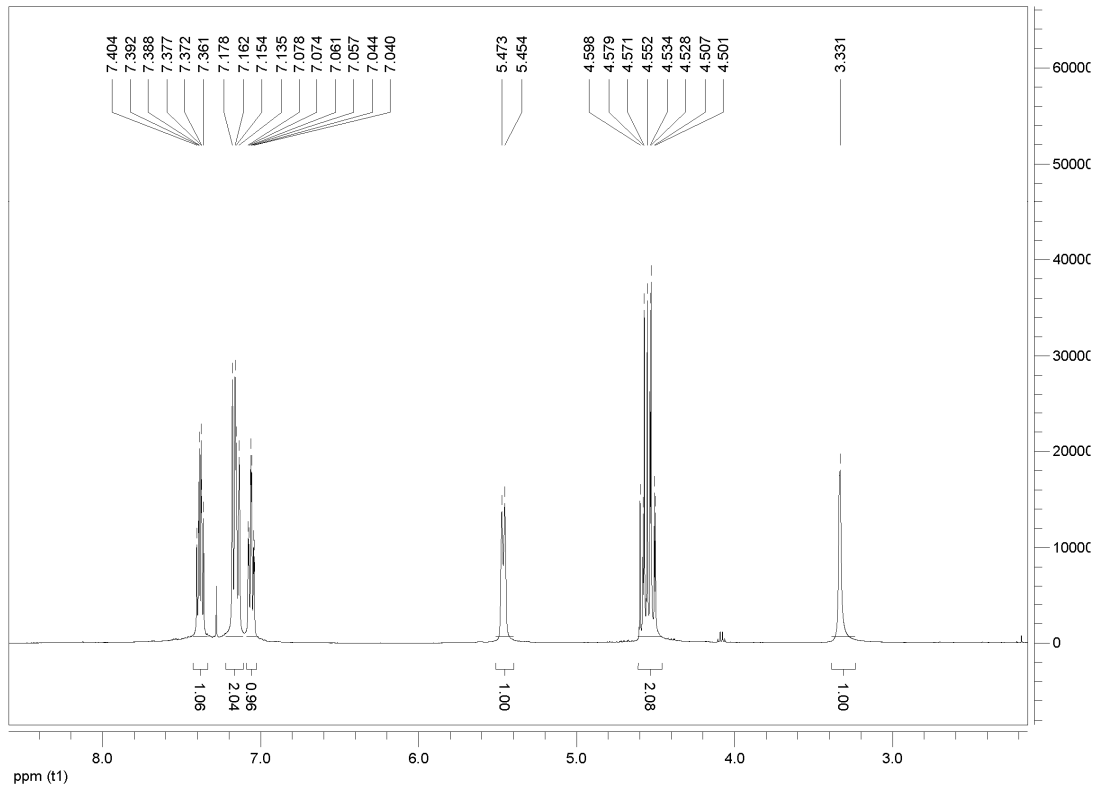

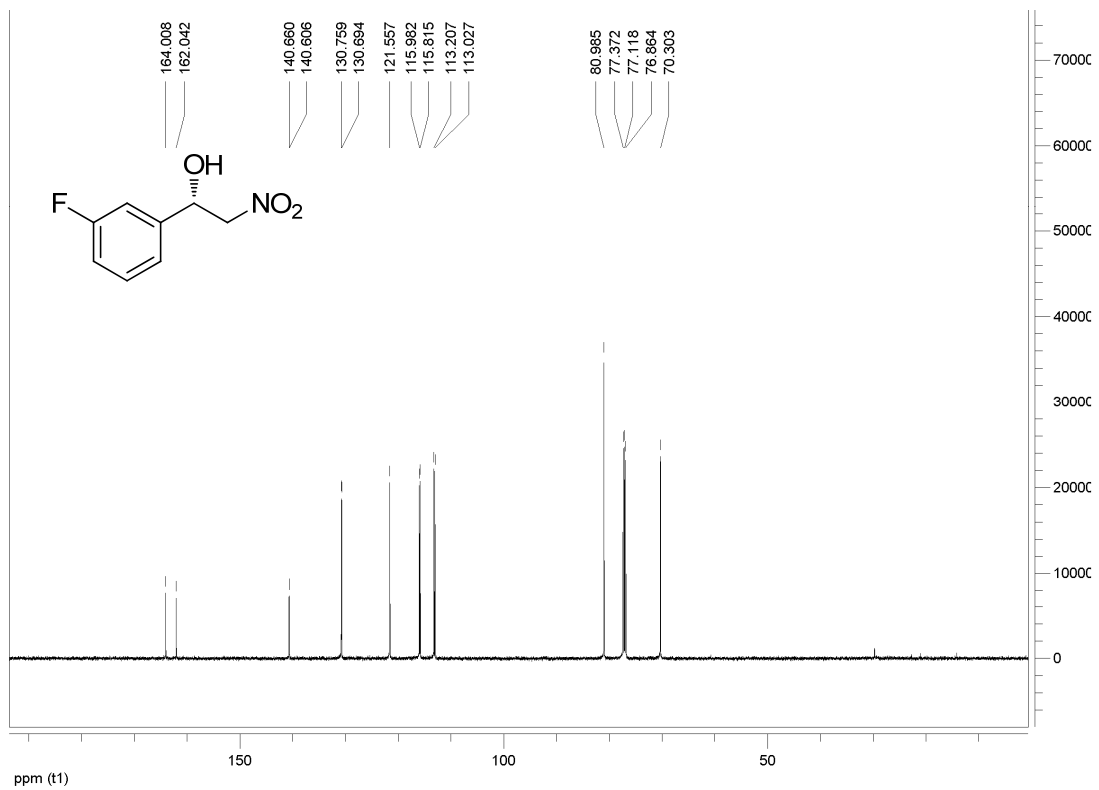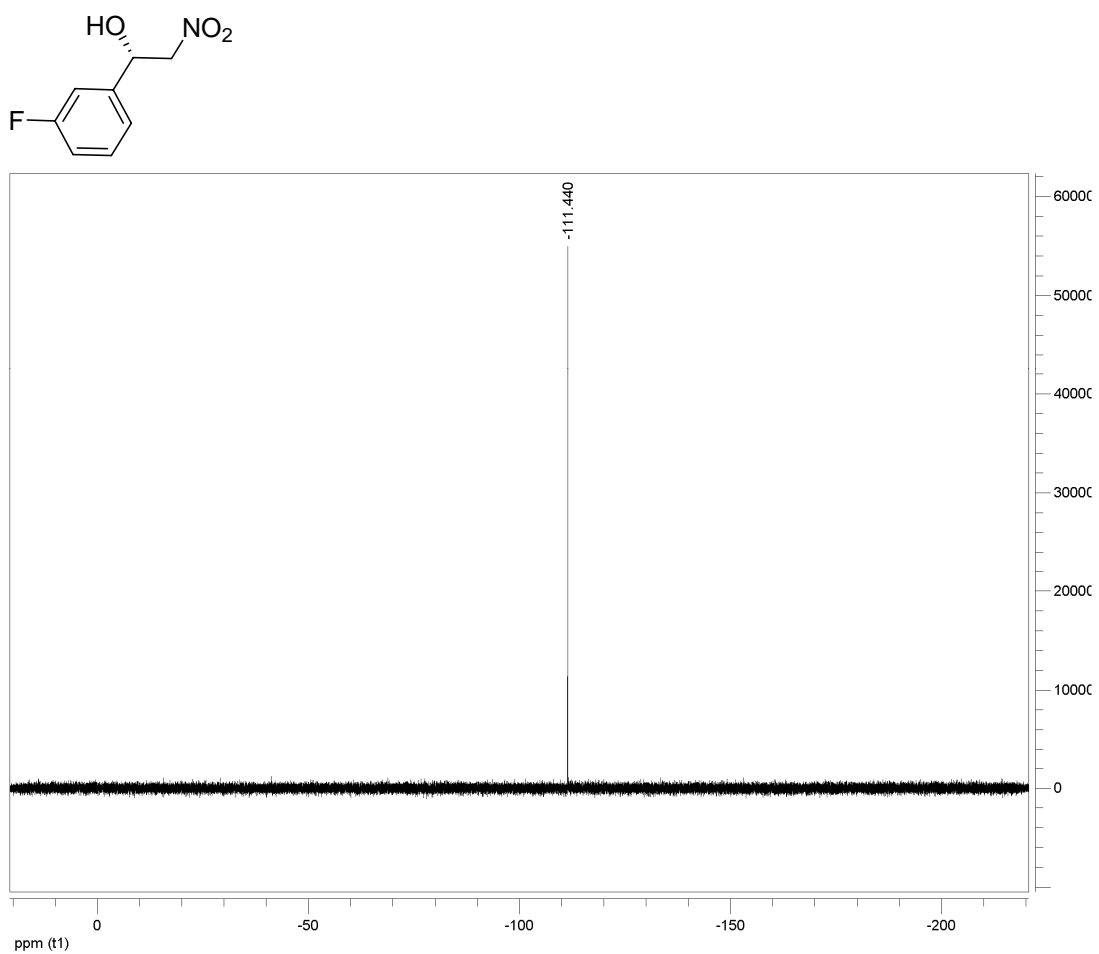

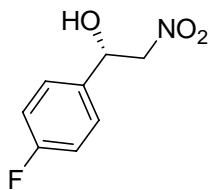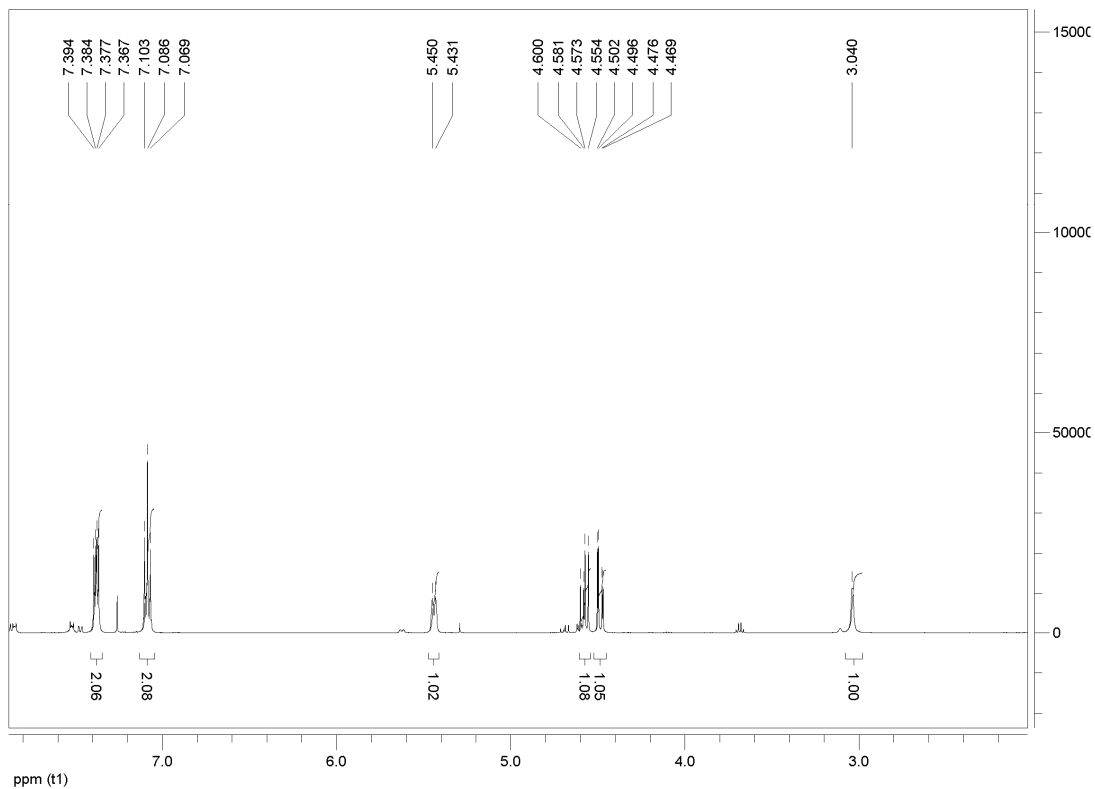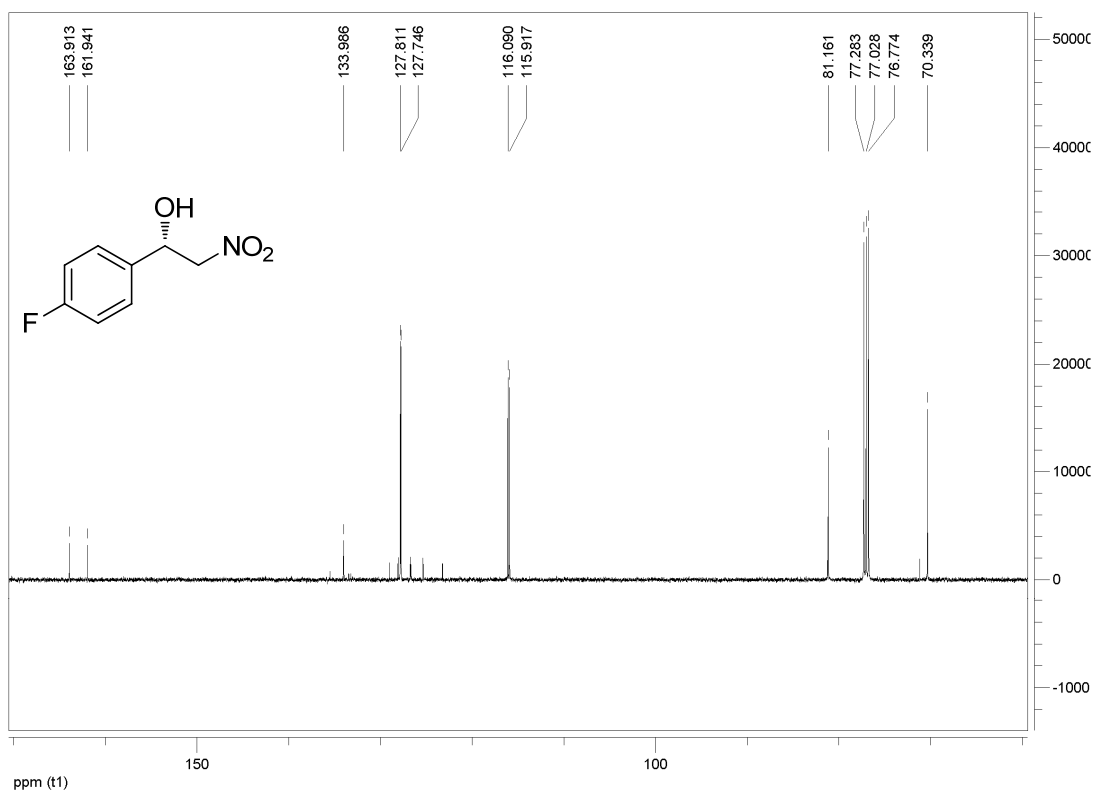

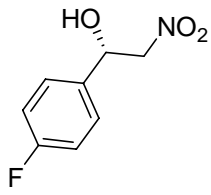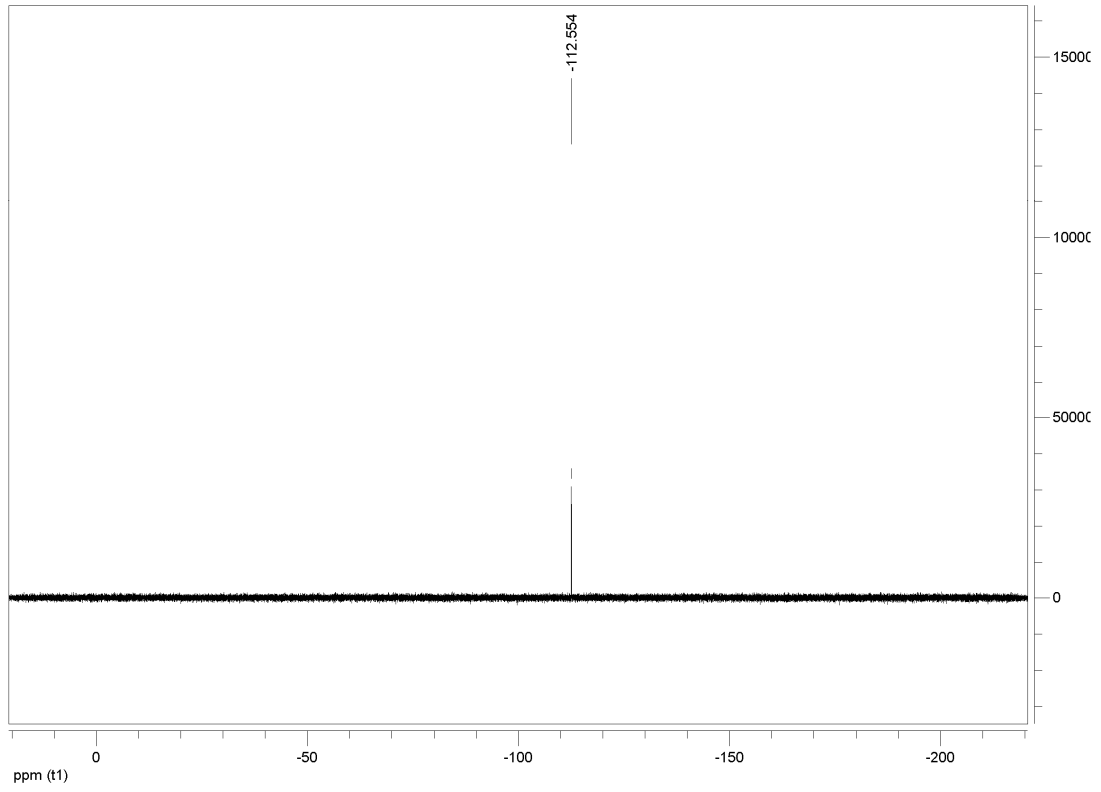

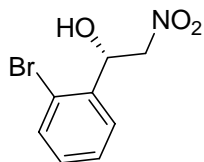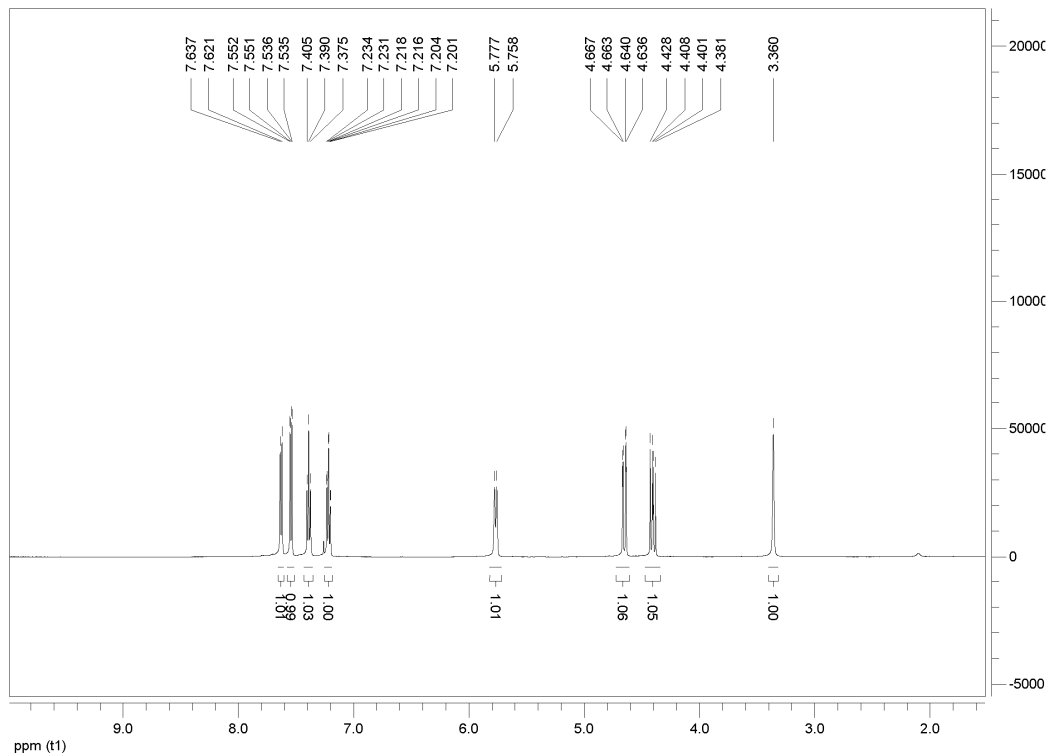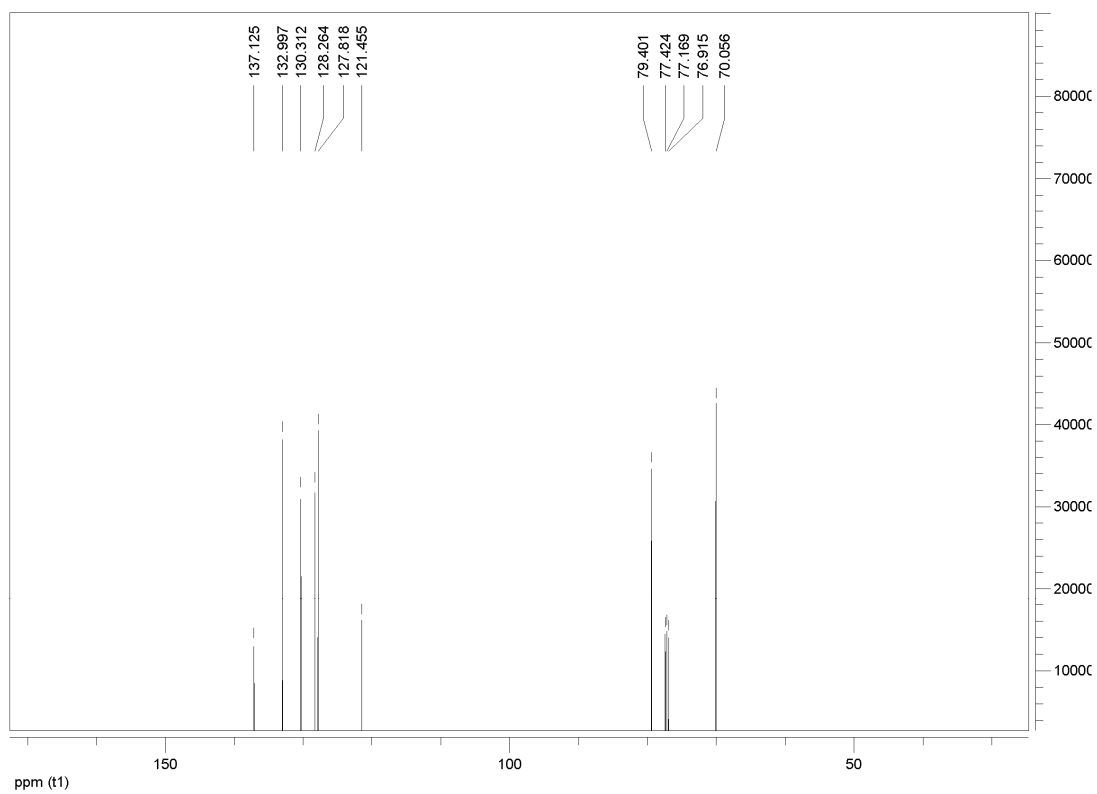

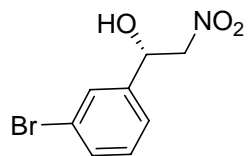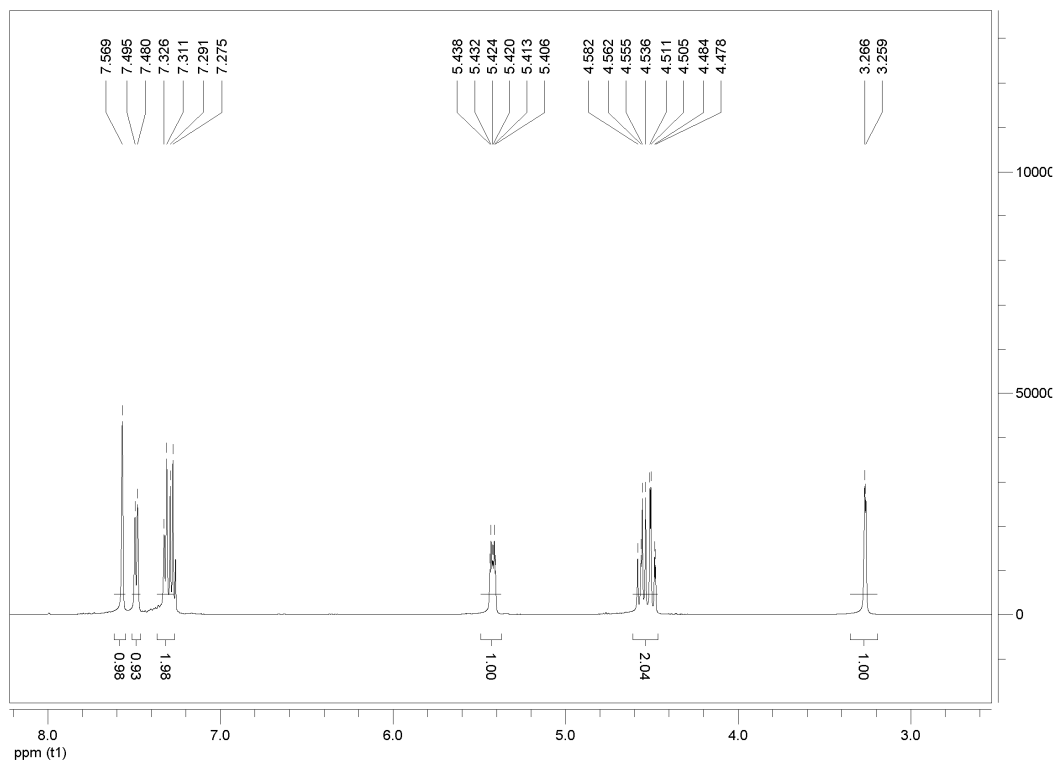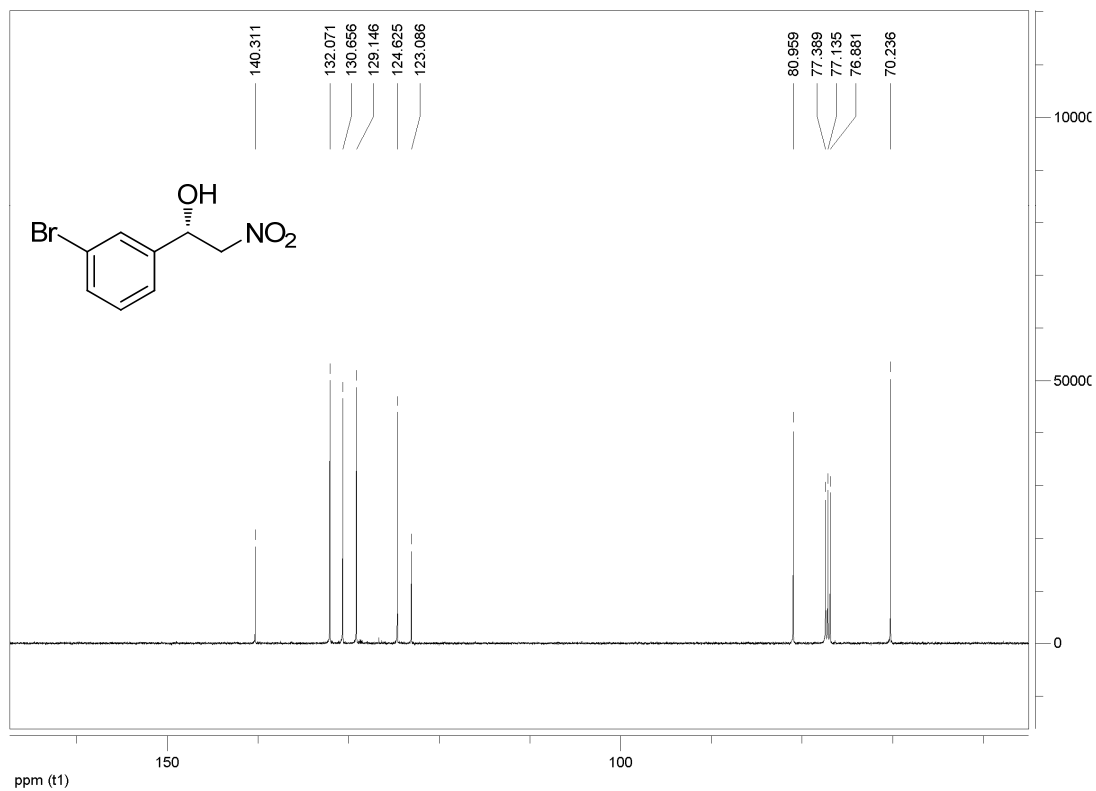

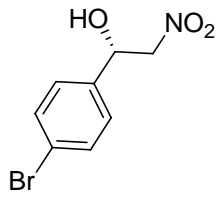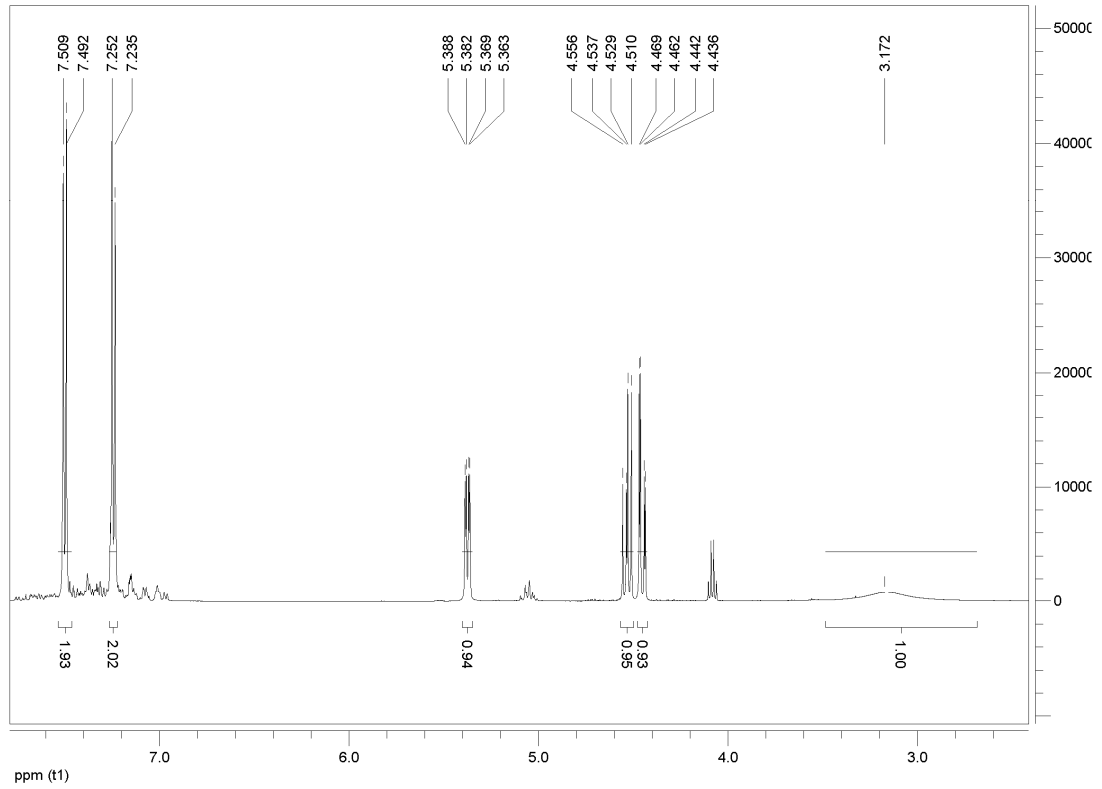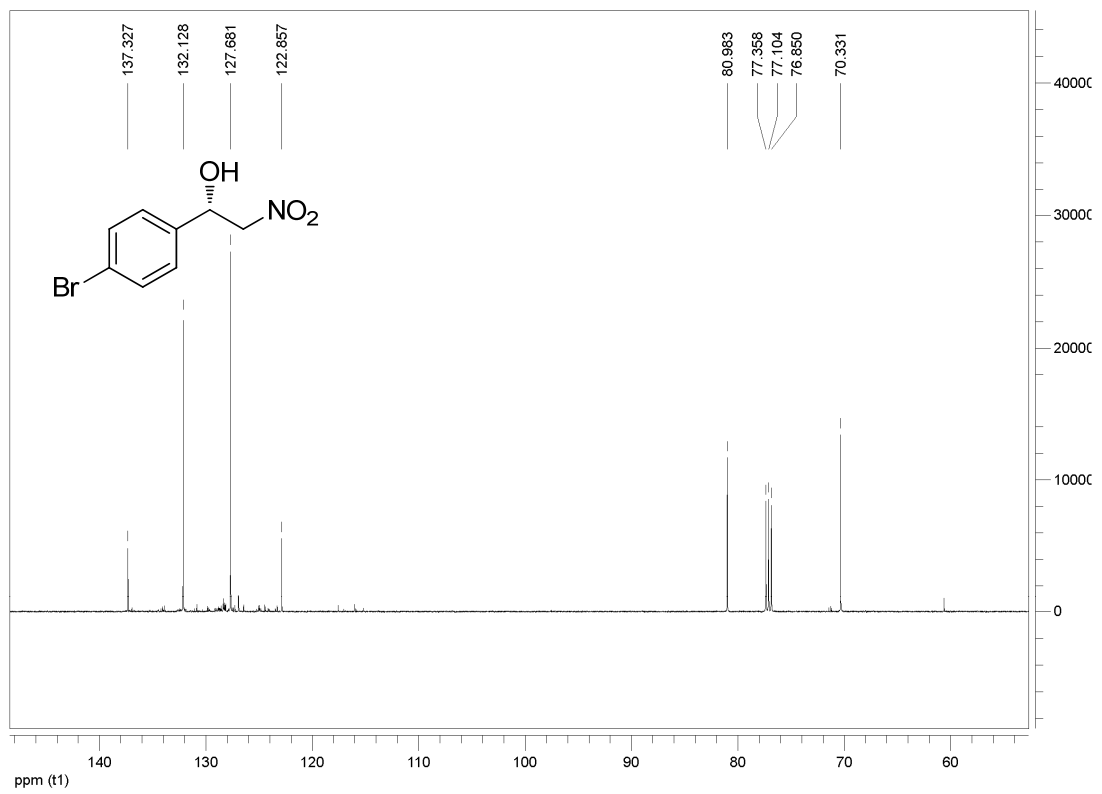



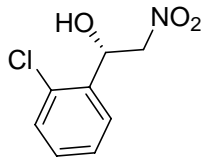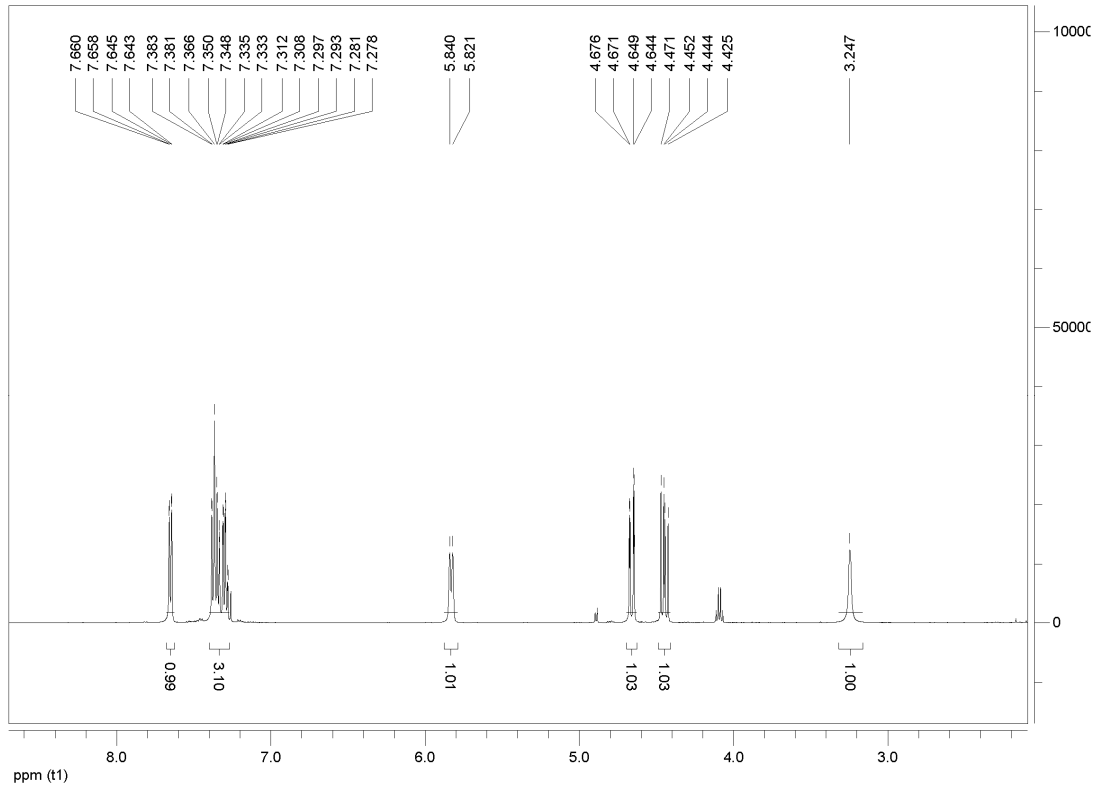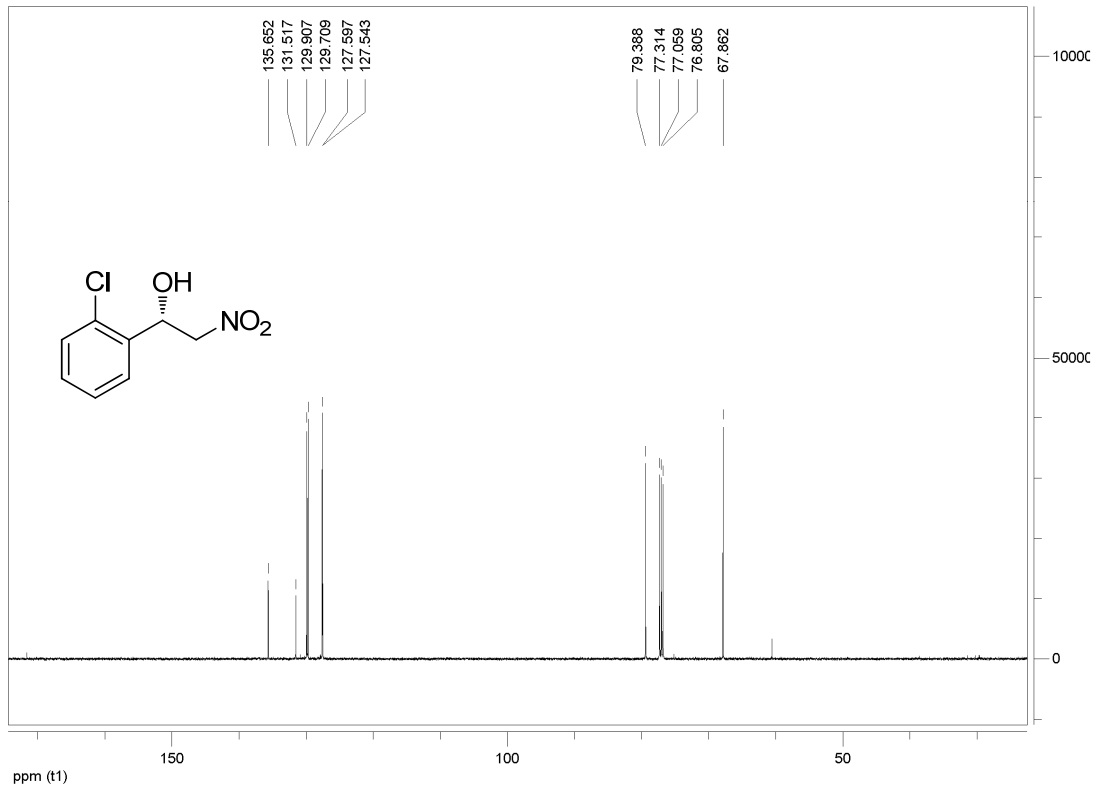

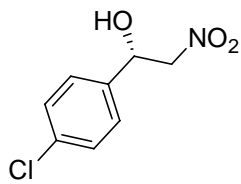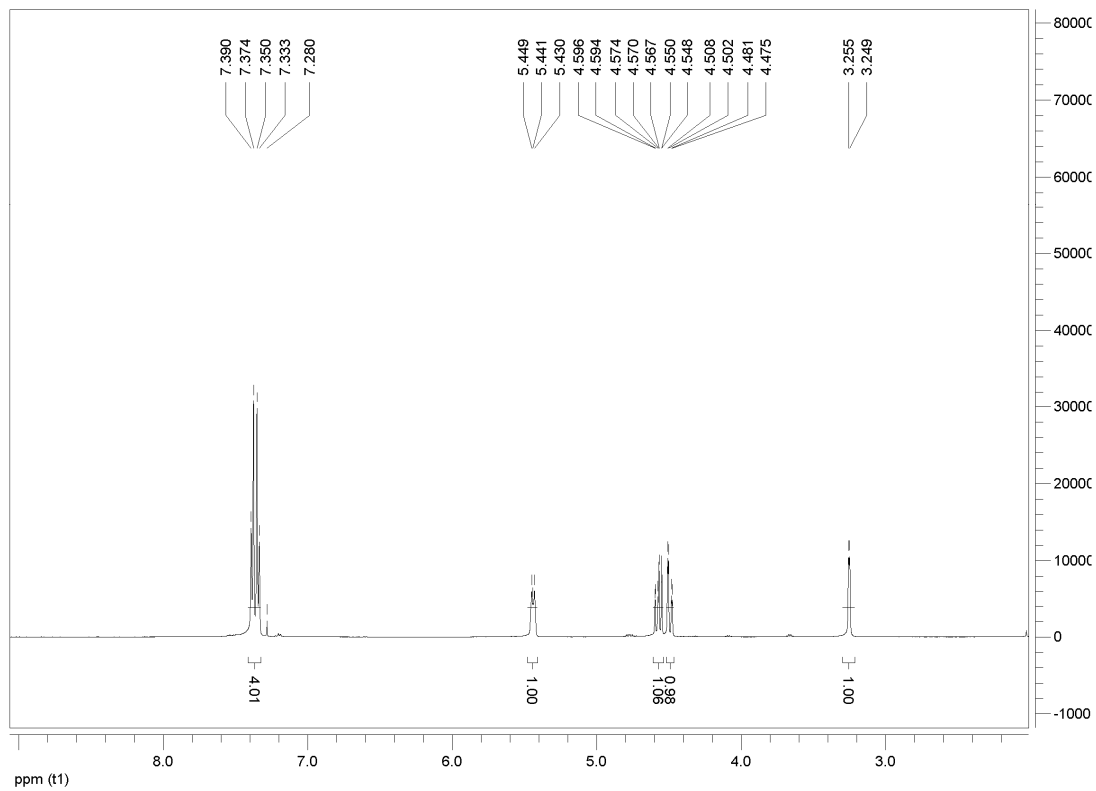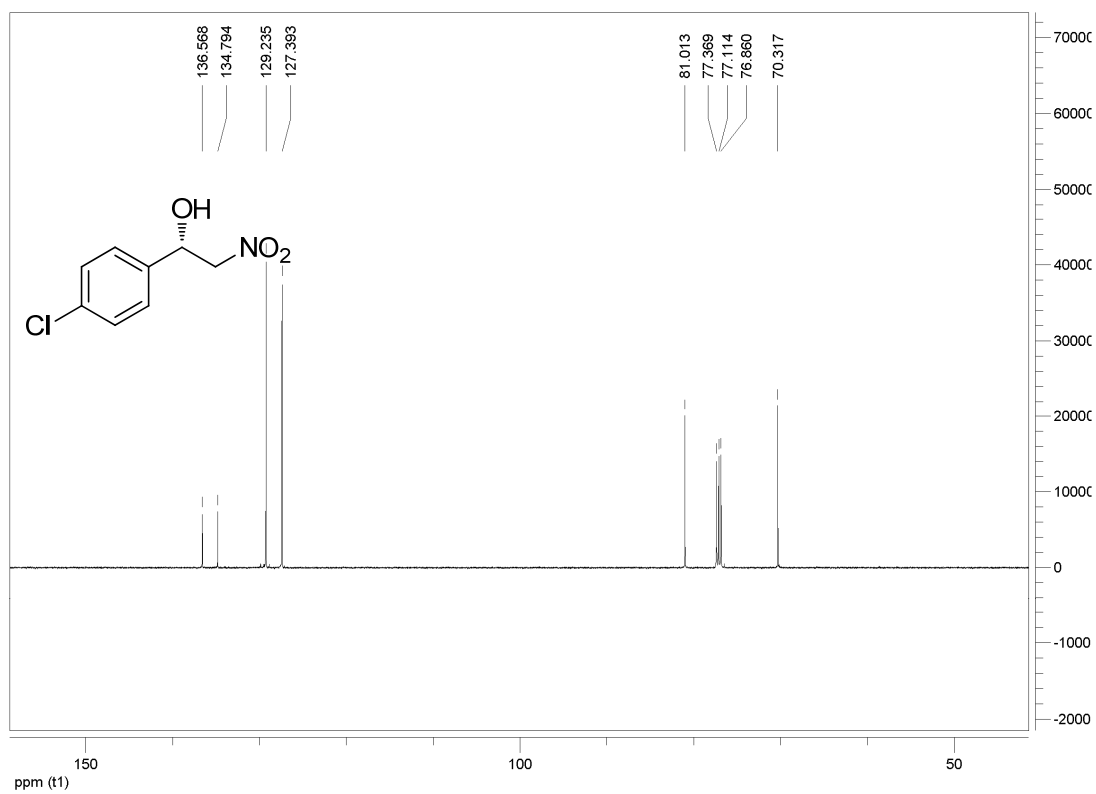

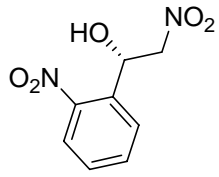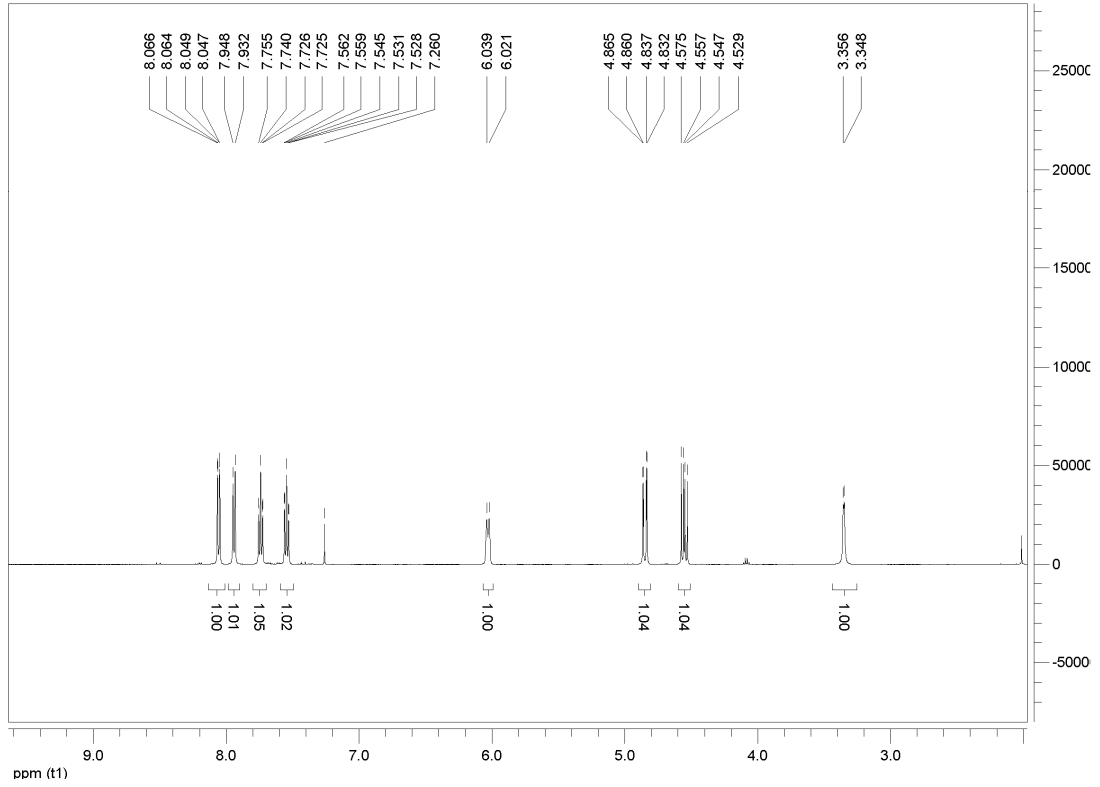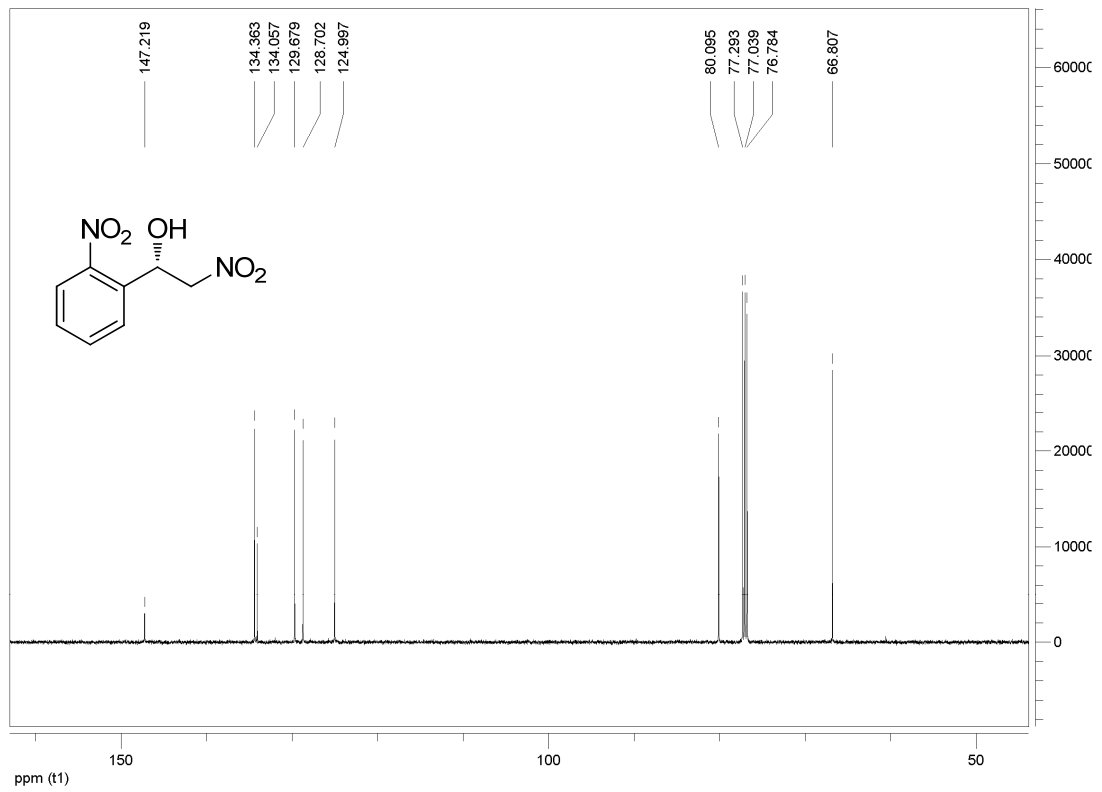

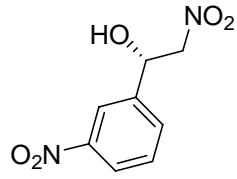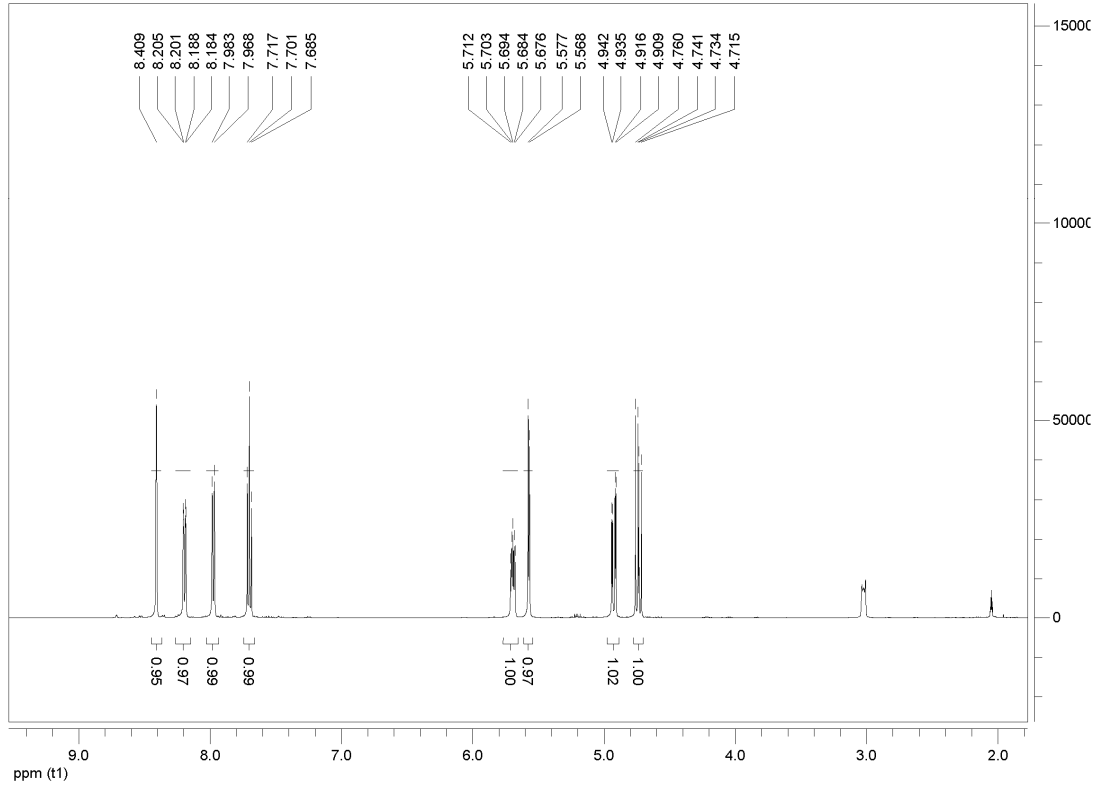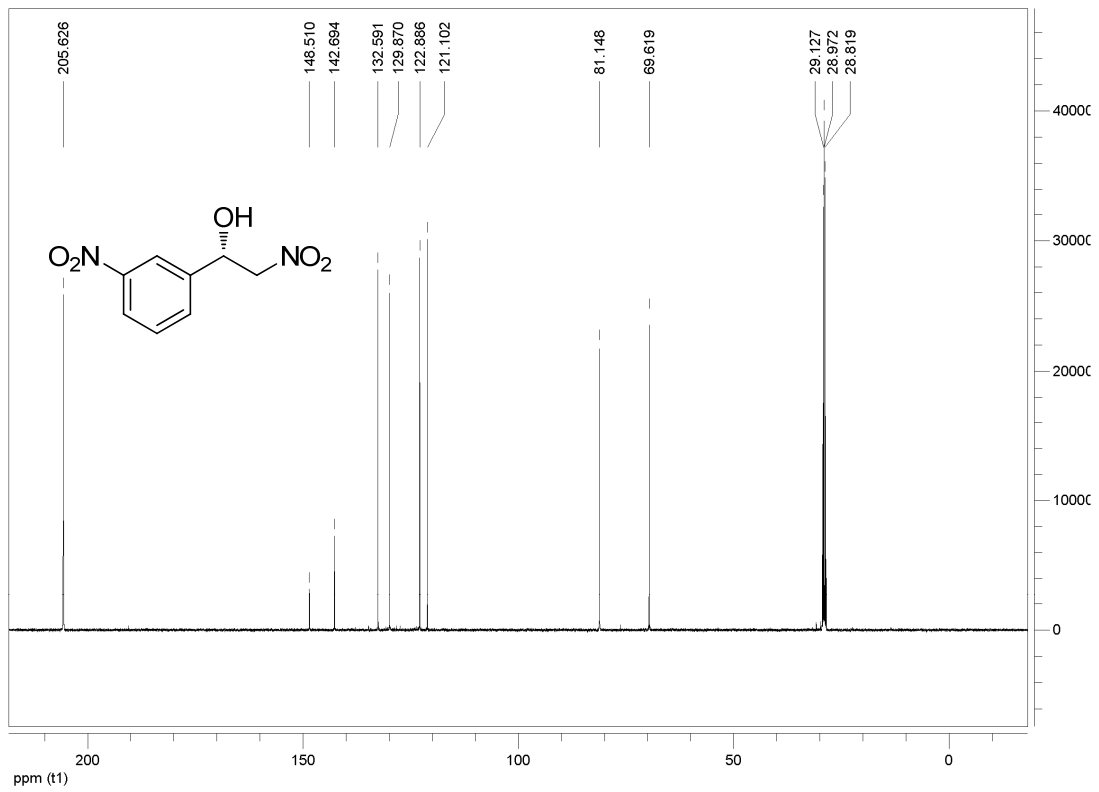

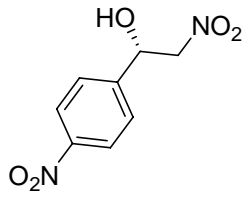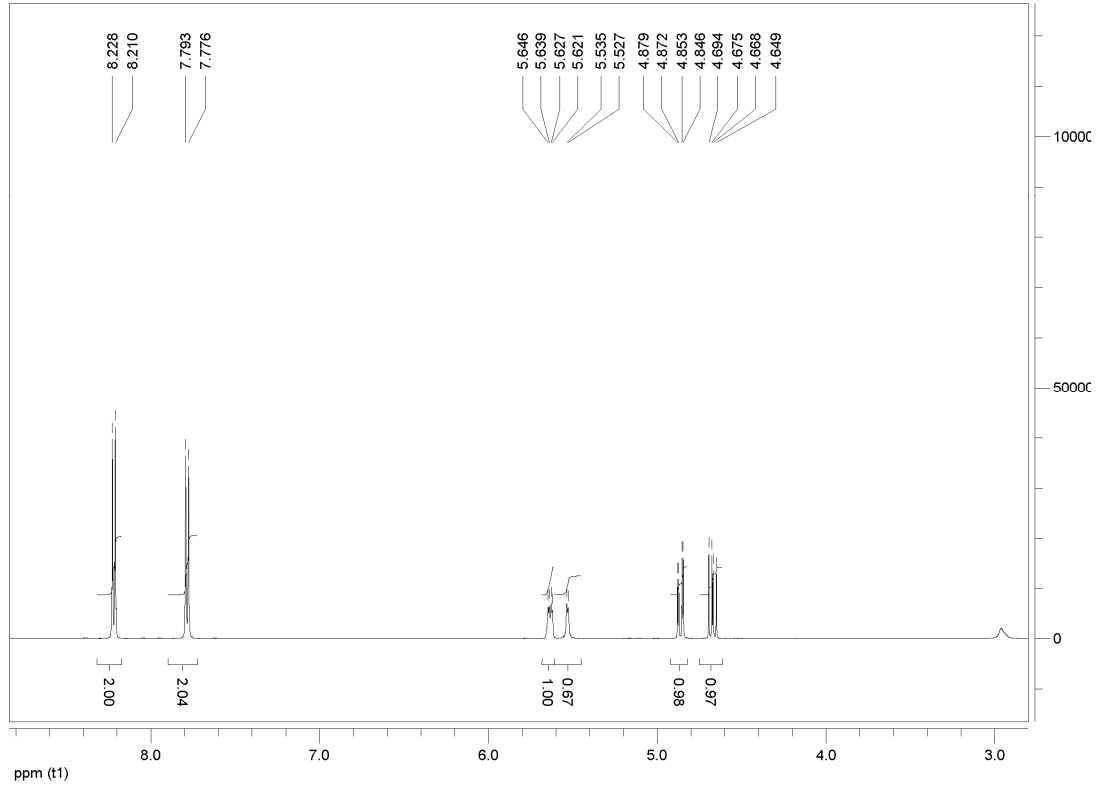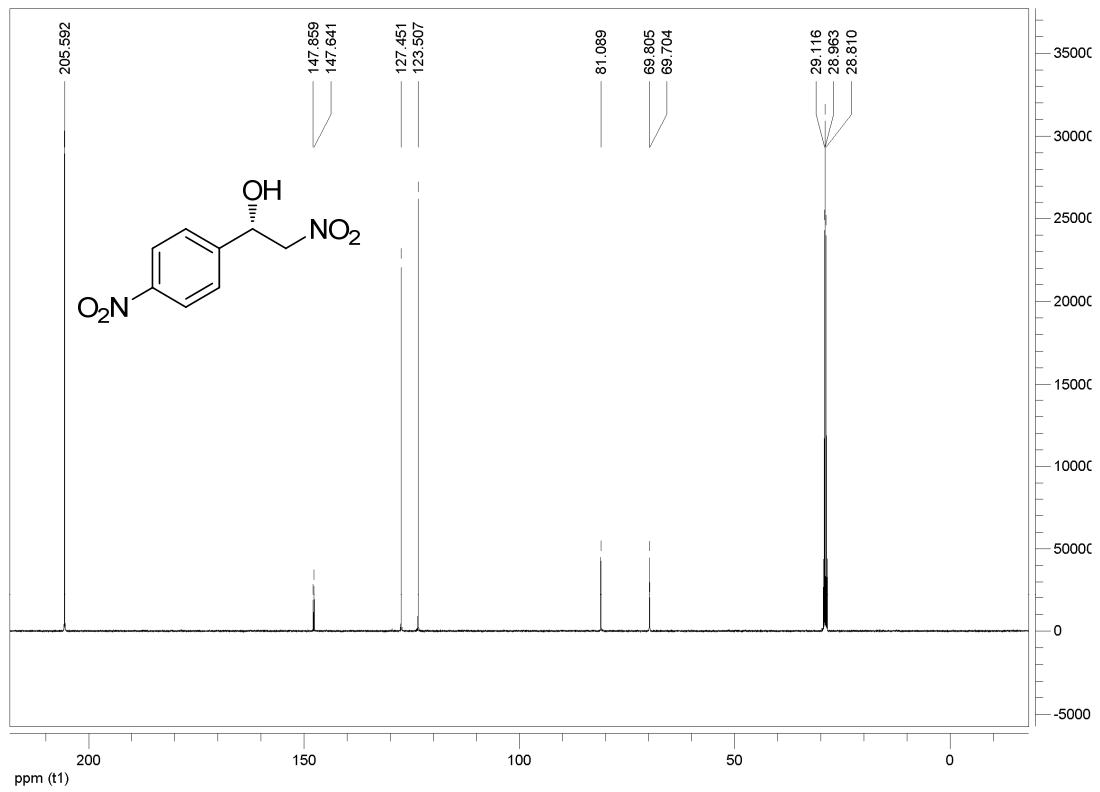

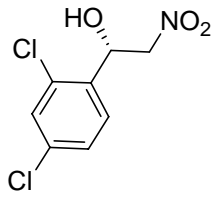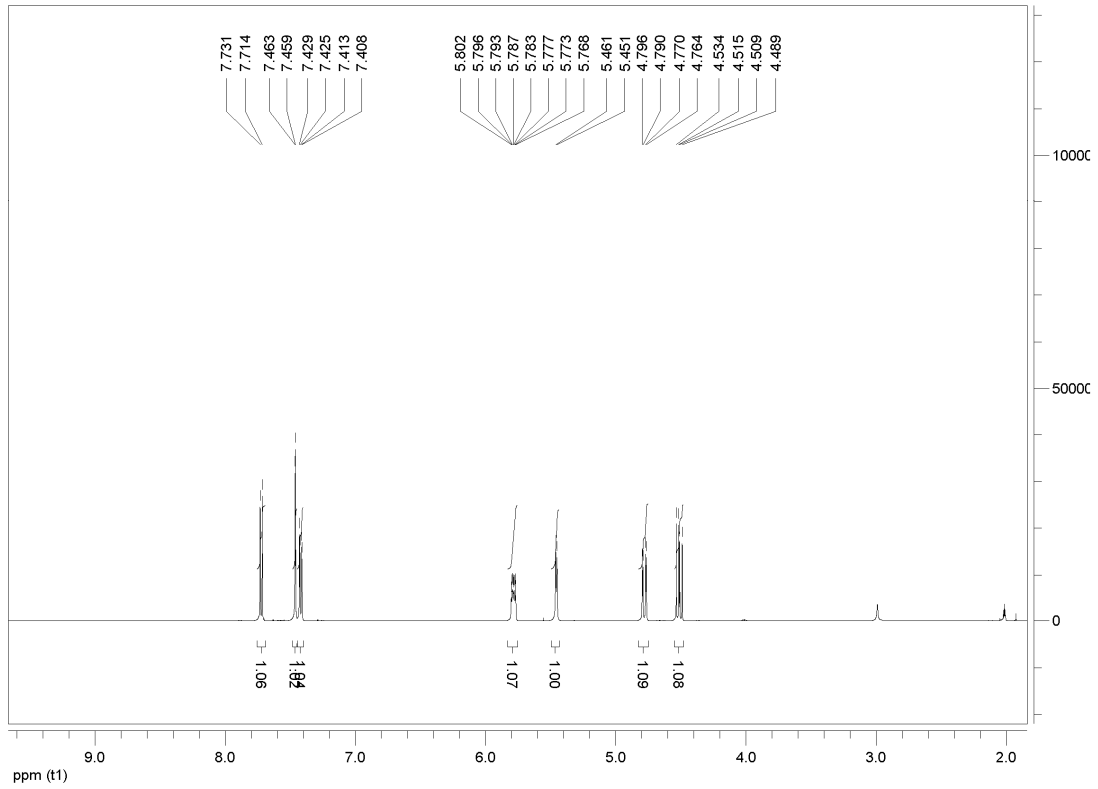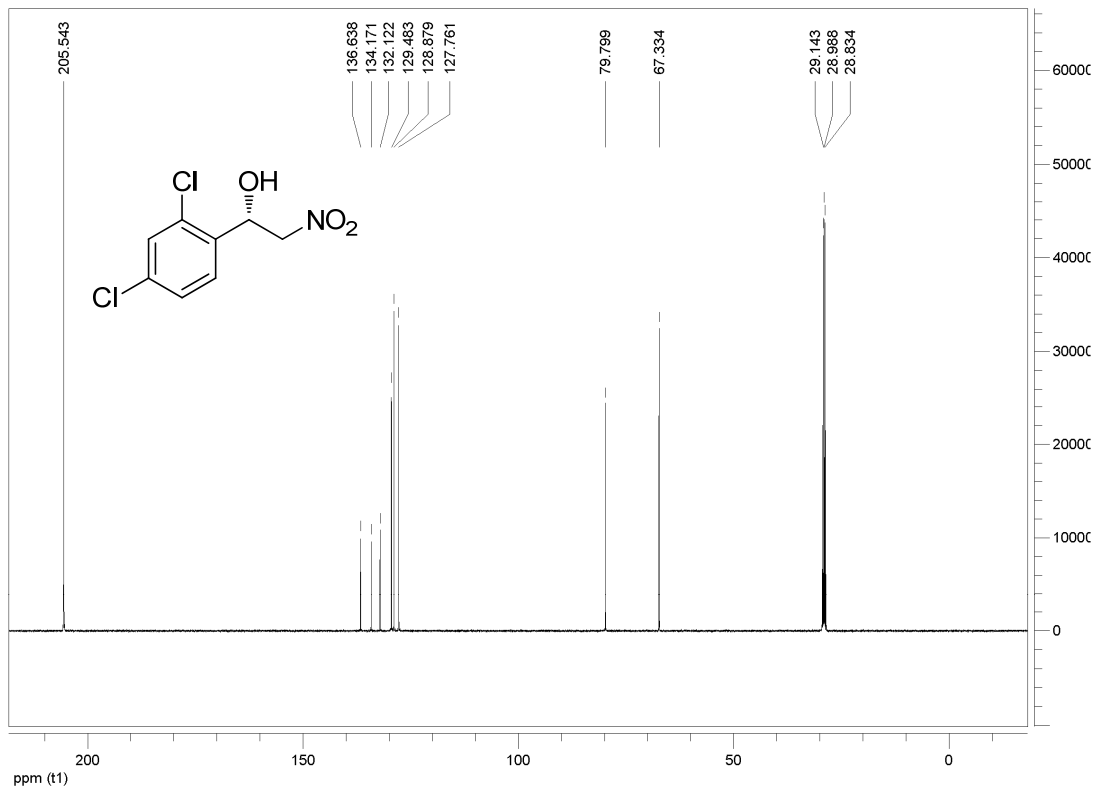

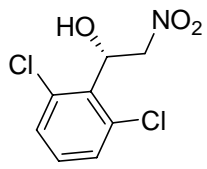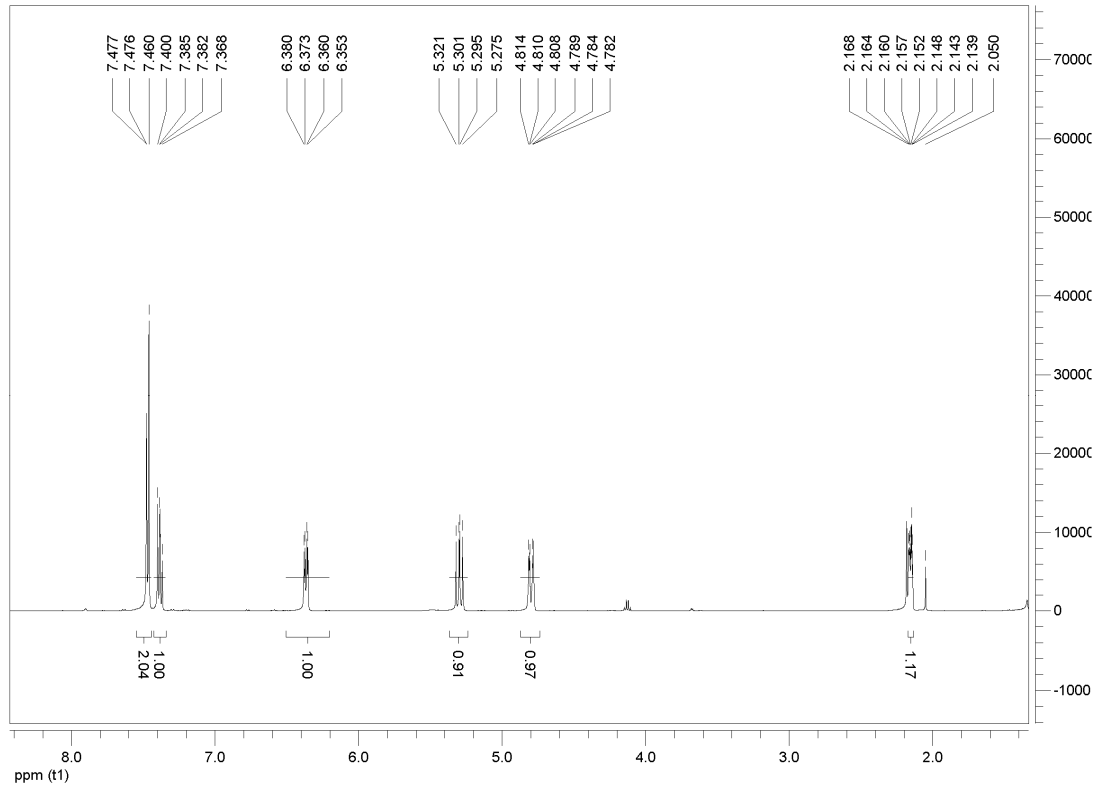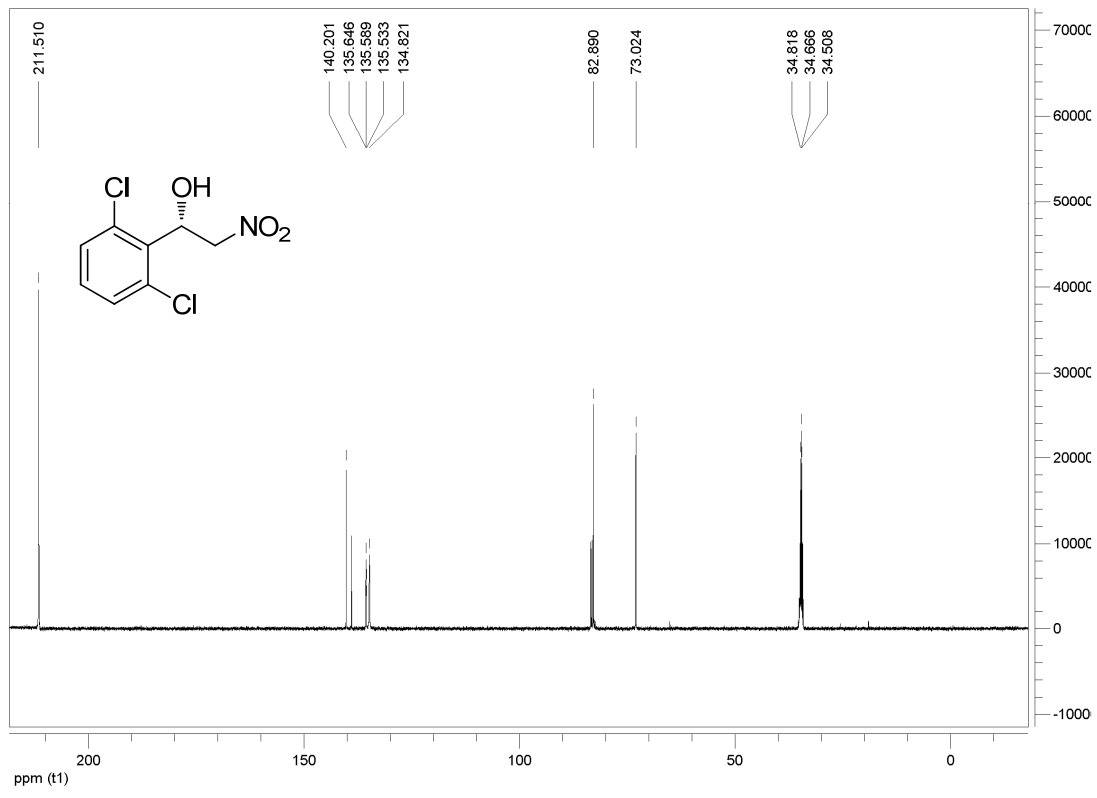

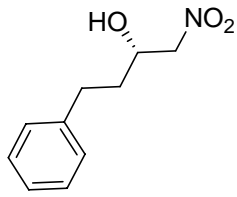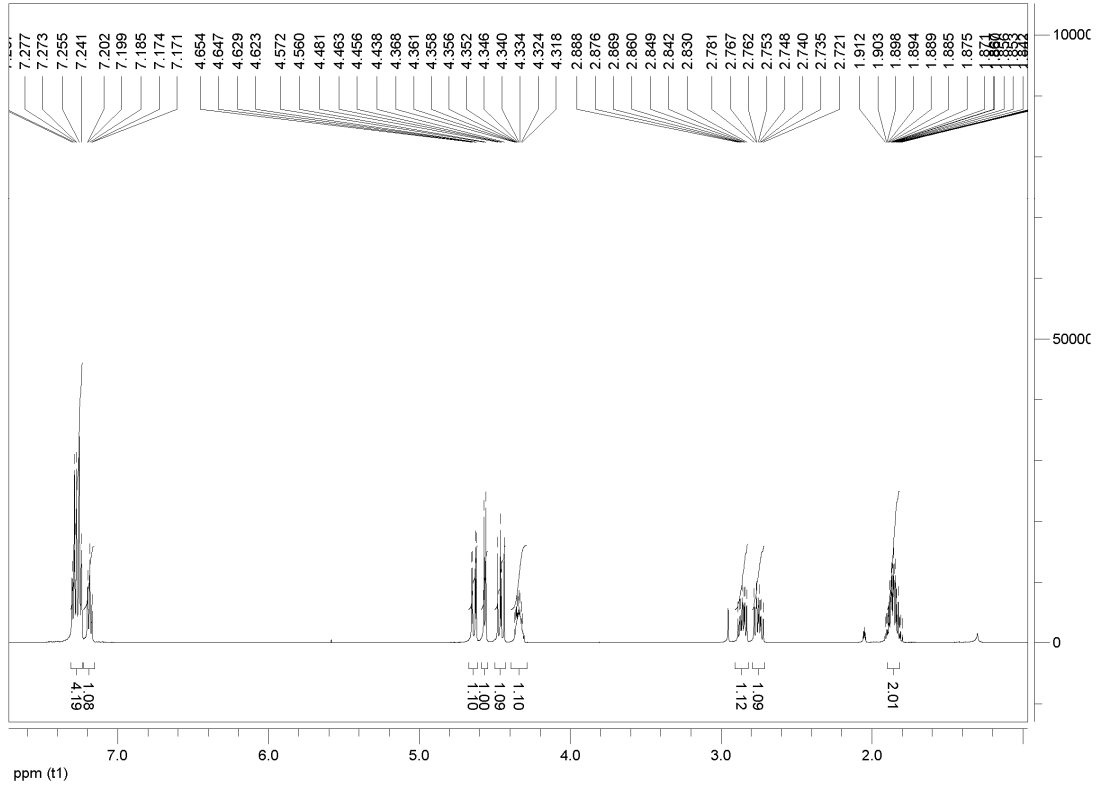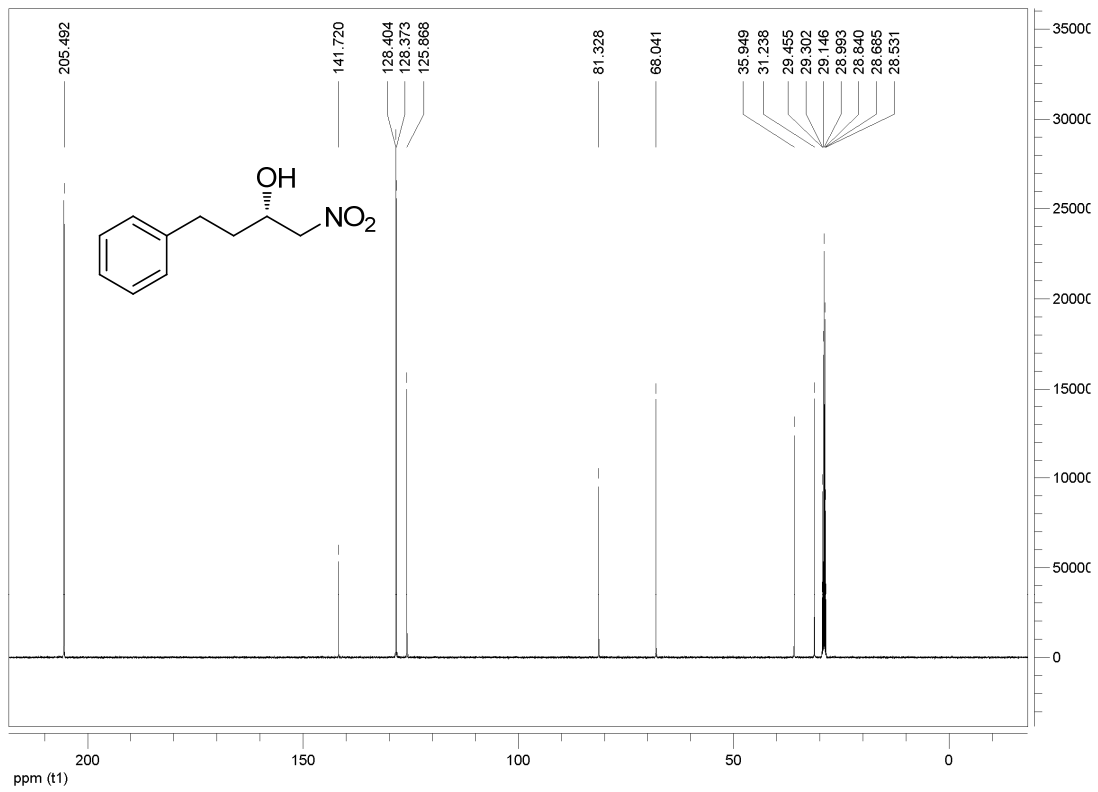



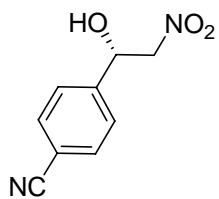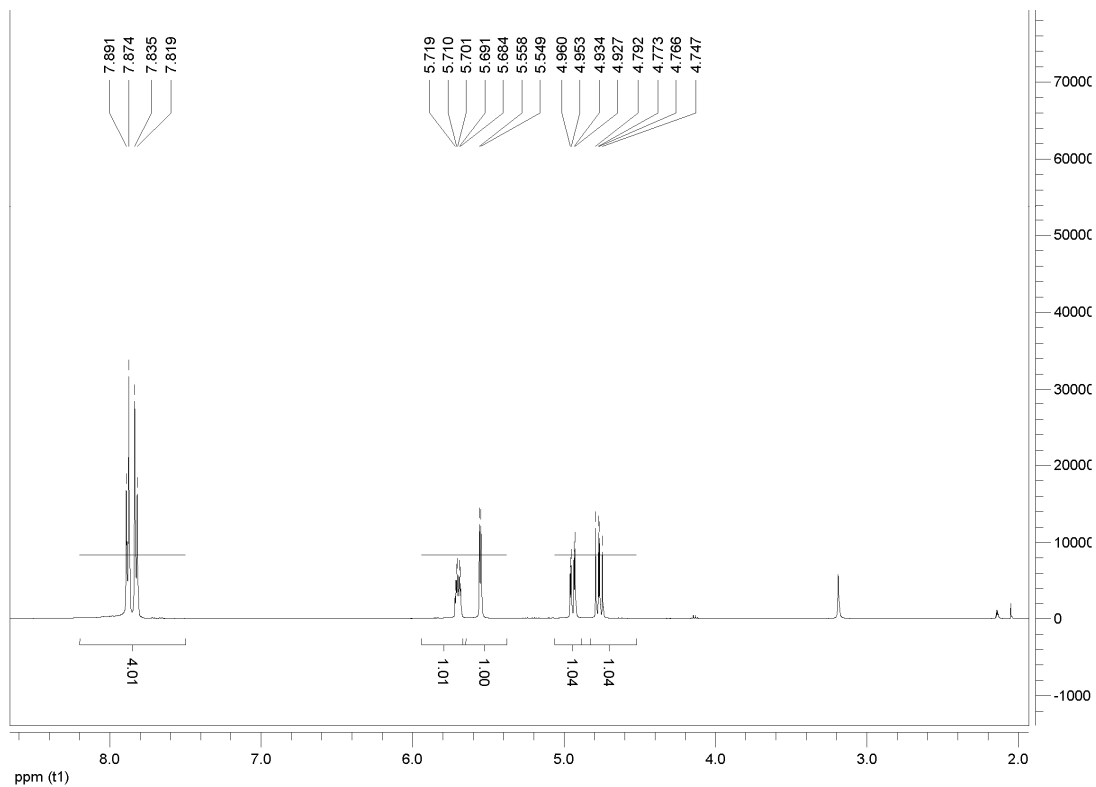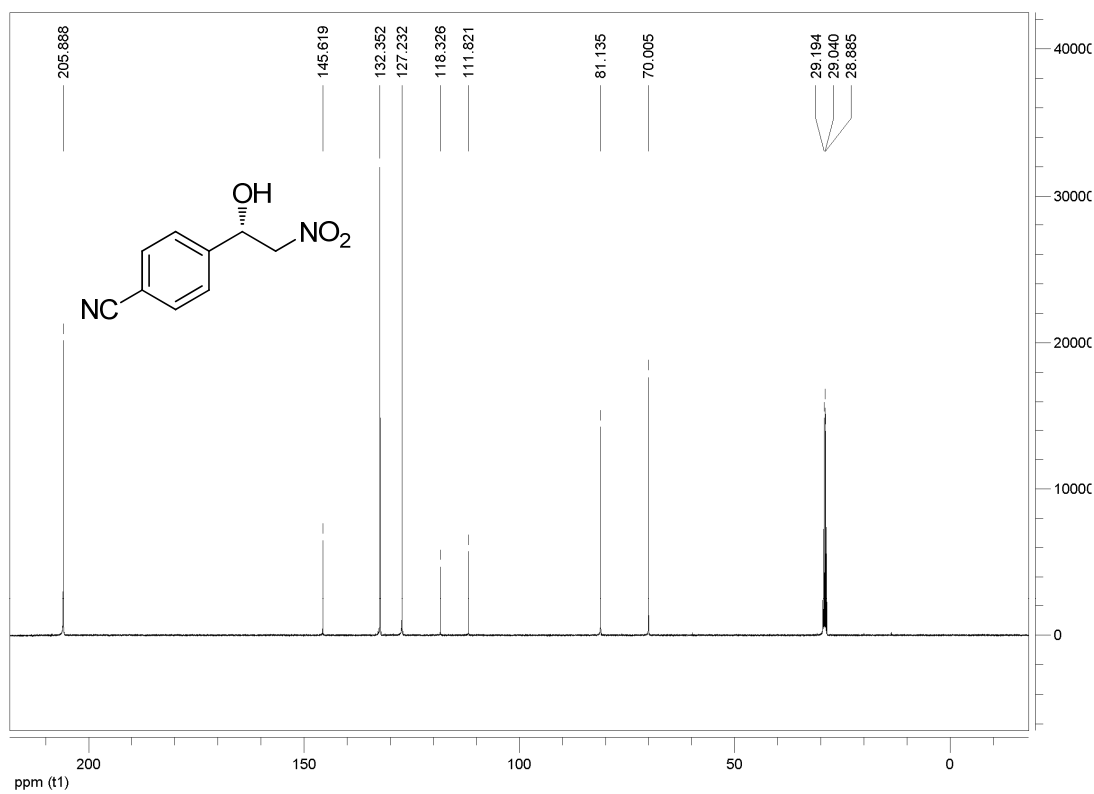

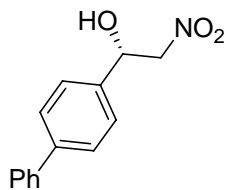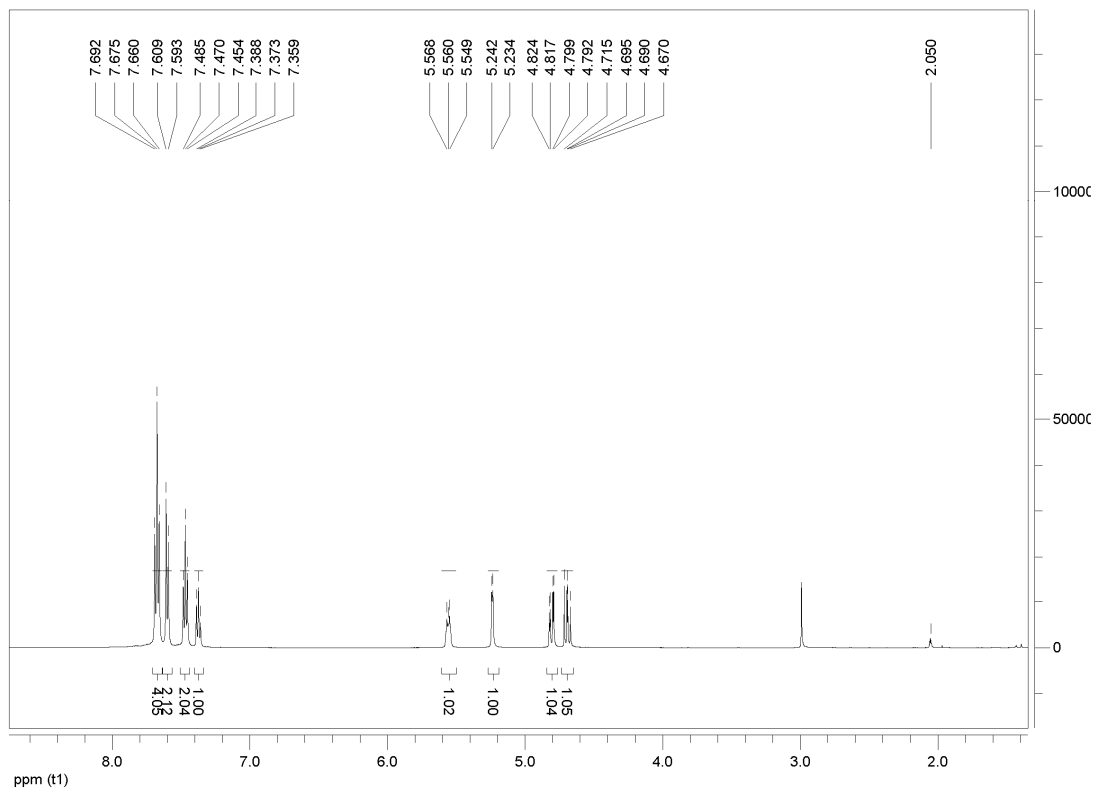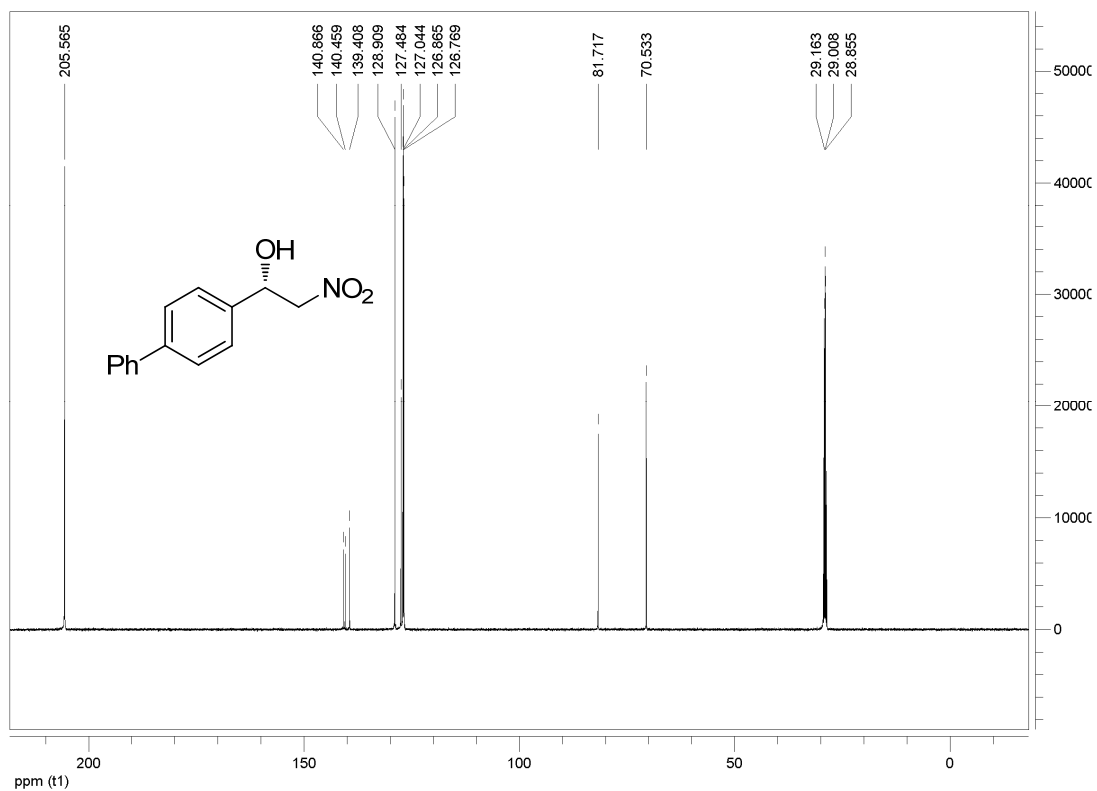

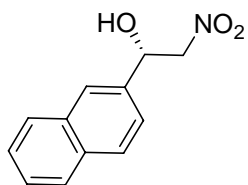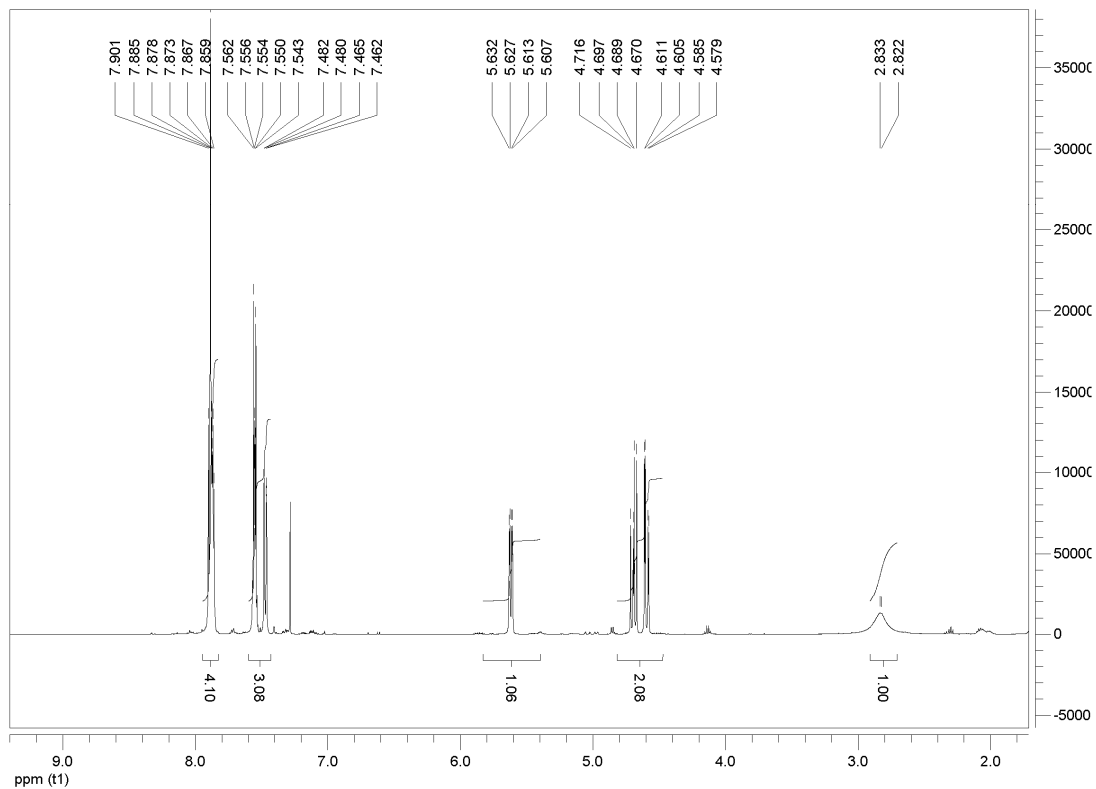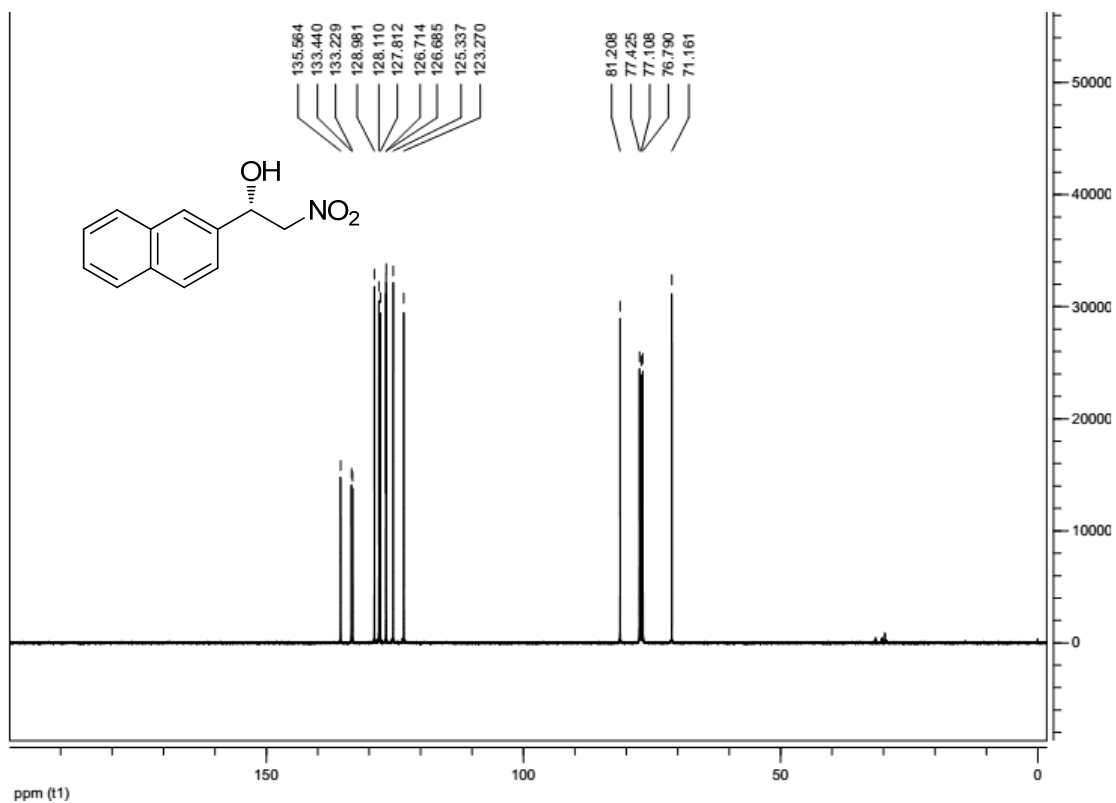

Supplement: c4ra06056c1.pdf [file c4ra06056c1.pdf]
